# Supplementary material
Source: publisher figshare collection journal article supplement (https://future-science-group.figshare.com/ndownloader/files/29039841)
Supplement: Supplementary file 1 [file 29039841]

## Sheet: S1
Table S1 Clinical information of all patients with pancreatic cancer
TCGA-PAAD					GSE57495
ID	Survival time(d)	Status	AJCC stage		ID	Survival time(d)	Status	AJCC stage
TCGA-HZ-A77P	330	ALIVE	Stage IIB		GSM1383778	406	DEAD	Stage IB
TCGA-IB-AAUR	338	ALIVE	Stage IIB		GSM1383779	1091	DEAD	Stage IIB
TCGA-3A-A9IV	1103	ALIVE	Stage IB		GSM1383780	186	DEAD	Stage IB
TCGA-2J-AABH	677	ALIVE	Stage IIA		GSM1383781	2395	ALIVE	Stage IIA
TCGA-F2-A44H	586	ALIVE	Stage IIA		GSM1383782	151	DEAD	Stage IB
TCGA-HZ-7924	840	ALIVE	Stage IIA		GSM1383783	619	DEAD	Stage IIA
TCGA-HZ-A49G	660	ALIVE	Stage IIB		GSM1383784	376	DEAD	Stage IIB
TCGA-FB-AAQ2	153	DEAD	Stage IIB		GSM1383785	1910	ALIVE	Stage IB
TCGA-2L-AAQE	684	DEAD	Stage IIB		GSM1383786	526	DEAD	Stage IIB
TCGA-IB-AAUM	8	ALIVE	Stage IIB		GSM1383787	850	DEAD	Stage IB
TCGA-HZ-A49I	308	DEAD	Stage IIB		GSM1383788	1357	ALIVE	Stage IIB
TCGA-FZ-5922	1101	DEAD	Stage IIA		GSM1383789	615	DEAD	Stage IIB
TCGA-FB-A4P6	363	ALIVE	Stage IIB		GSM1383790	477	DEAD	Stage IIB
TCGA-3A-A9IO	1942	ALIVE	unknown		GSM1383791	1132	DEAD	Stage IIB
TCGA-YB-A89D	350	ALIVE	Stage IIB		GSM1383792	278	DEAD	Stage IIB
TCGA-HZ-7925	614	DEAD	Stage IIB		GSM1383793	1736	ALIVE	Stage IIA
TCGA-IB-7654	476	DEAD	Stage IIB		GSM1383794	947	DEAD	Stage IIB
TCGA-XN-A8T5	720	ALIVE	Stage IB		GSM1383795	904	DEAD	Stage IIA
TCGA-3A-A9IS	998	ALIVE	Stage IB		GSM1383796	1623	ALIVE	Stage IB
TCGA-XD-AAUI	366	DEAD	Stage IIB		GSM1383797	235	DEAD	Stage IIB
TCGA-HV-A7OL	252	ALIVE	Stage IIA		GSM1383798	1134	ALIVE	Stage IIA
TCGA-HZ-8002	366	DEAD	Stage IIB		GSM1383799	1485	ALIVE	Stage IIA
TCGA-3A-A9IL	2741	ALIVE	Stage I		GSM1383800	872	DEAD	Stage IIA
TCGA-3A-A9J0	743	ALIVE	Stage IIB		GSM1383801	485	DEAD	Stage IIB
TCGA-OE-A75W	267	DEAD	Stage IIA		GSM1383802	88	DEAD	Stage IIA
TCGA-FZ-5924	480	DEAD	Stage IIA		GSM1383803	952	DEAD	Stage IB
TCGA-2J-AABF	691	DEAD	Stage IIB		GSM1383804	790	DEAD	Stage IIB
TCGA-FB-AAQ6	244	DEAD	Stage IA		GSM1383805	266	DEAD	Stage IIB
TCGA-PZ-A5RE	470	DEAD	Stage IIB		GSM1383806	318	DEAD	Stage IIB
TCGA-2J-AAB9	627	DEAD	Stage IIB		GSM1383807	645	DEAD	Stage IIB
TCGA-2L-AAQJ	394	DEAD	Stage III		GSM1383808	916	DEAD	Stage I
TCGA-HZ-A4BH	194	ALIVE	Stage IIB		GSM1383809	585	DEAD	Stage IIB
TCGA-FB-AAPU	381	DEAD	Stage IIA		GSM1383810	418	DEAD	Stage IIA
TCGA-Z5-AAPL	467	ALIVE	Stage IIA		GSM1383811	908	ALIVE	Stage IIA
TCGA-FB-AAPQ	1130	DEAD	Stage IIB		GSM1383812	1004	ALIVE	Stage IB
TCGA-HZ-A9TJ	603	ALIVE	Stage IV		GSM1383813	538	DEAD	Stage IB
TCGA-IB-7897	486	DEAD	Stage IIB		GSM1383814	860	ALIVE	Stage IIA
TCGA-3A-A9I5	1794	ALIVE	unknown		GSM1383815	135	DEAD	Stage IIB
TCGA-HZ-8315	299	DEAD	Stage IIA		GSM1383816	601	DEAD	Stage IIB
TCGA-FZ-5921	155	DEAD	Stage IIB		GSM1383817	813	ALIVE	Stage IIB
TCGA-FZ-5923	619	DEAD	Stage IV		GSM1383818	1107	ALIVE	Stage IIB
TCGA-HZ-A8P1	7	ALIVE	Stage IB		GSM1383819	990	DEAD	Stage IIB
TCGA-IB-A7M4	483	ALIVE	Stage IIB		GSM1383820	469	DEAD	Stage IIA
TCGA-IB-7647	666	DEAD	Stage IIB		GSM1383821	487	DEAD	Stage IIB
TCGA-FB-AAPZ	716	ALIVE	Stage IIB		GSM1383822	493	DEAD	Stage IIB
TCGA-RB-AA9M	286	ALIVE	Stage IIB		GSM1383823	265	DEAD	Stage IIA
TCGA-HZ-8638	151	DEAD	Stage IA		GSM1383824	1004	ALIVE	Stage IB
TCGA-LB-A8F3	379	ALIVE	Stage IIA		GSM1383825	365	DEAD	Stage IIB
TCGA-IB-A7LX	250	DEAD	Stage IIB		GSM1383826	657	ALIVE	Stage IIB
TCGA-IB-7888	1332	DEAD	Stage IIA		GSM1383827	345	ALIVE	Stage IB
TCGA-S4-A8RM	646	ALIVE	Stage IIB		GSM1383828	298	DEAD	Stage IIB
TCGA-FB-AAPS	228	ALIVE	Stage IIB		GSM1383829	875	ALIVE	Stage IIA
TCGA-IB-AAUO	239	DEAD	Stage IIB		GSM1383830	465	DEAD	Stage IIB
TCGA-3A-A9IB	224	DEAD	Stage IIB		GSM1383831	890	ALIVE	Stage IIA
TCGA-FB-AAPP	485	DEAD	Stage IIB		GSM1383832	727	ALIVE	Stage IIB
TCGA-F2-A7TX	95	DEAD	Stage IIB		GSM1383833	530	DEAD	Stage IIB
TCGA-Q3-AA2A	95	ALIVE	Stage IB		GSM1383834	769	ALIVE	Stage IB
TCGA-LB-A9Q5	313	DEAD	Stage IIB		GSM1383835	634	DEAD	Stage IIA
TCGA-XD-AAUH	395	ALIVE	Stage IIB		GSM1383836	681	ALIVE	Stage IIB
TCGA-IB-7649	467	DEAD	Stage IIB		GSM1383837	408	DEAD	Stage IIB
TCGA-IB-A5SO	365	DEAD	Stage IIB		GSM1383838	697	ALIVE	Stage IIA
TCGA-3A-A9IJ	1854	ALIVE	Stage IB		GSM1383839	224	DEAD	Stage IIB
TCGA-FB-A5VM	449	ALIVE	Stage IB		GSM1383840	113	DEAD	Stage IIB
TCGA-IB-8127	522	ALIVE	Stage IIB
TCGA-3E-AAAZ	2182	DEAD	Stage IIA
TCGA-2J-AABU	277	DEAD	Stage IIB
TCGA-HV-AA8V	920	ALIVE	Stage IIB
TCGA-IB-AAUU	245	ALIVE	Stage IIB
TCGA-IB-A5SS	460	DEAD	Stage IIB
TCGA-3A-A9IU	458	DEAD	Stage IIB
TCGA-3A-A9IN	2084	ALIVE	Stage IB
TCGA-FB-A7DR	353	DEAD	Stage IIA
TCGA-FB-AAQ0	473	DEAD	Stage IIA
TCGA-3A-A9IR	1542	ALIVE	Stage IB
TCGA-IB-7891	648	ALIVE	Stage IIB
TCGA-2J-AABI	969	ALIVE	Stage IIA
TCGA-IB-AAUS	225	ALIVE	Stage IIB
TCGA-FB-AAPY	1059	DEAD	Stage IIB
TCGA-F2-A44G	233	DEAD	Stage IIB
TCGA-HV-A5A3	128	DEAD	Stage IIA
TCGA-US-A774	695	DEAD	Stage IIB
TCGA-IB-A5SP	482	ALIVE	Stage IIA
TCGA-US-A77E	430	DEAD	Stage IIB
TCGA-FZ-5919	741	DEAD	Stage IIB
TCGA-S4-A8RP	702	DEAD	Stage IIB
TCGA-M8-A5N4	584	ALIVE	Stage IIA
TCGA-HZ-8001	706	ALIVE	Stage III
TCGA-3A-A9I7	1323	ALIVE	Stage IIB
TCGA-F2-A8YN	517	ALIVE	Stage IIA
TCGA-IB-7645	1502	DEAD	Stage IIB
TCGA-IB-7890	598	DEAD	Stage IB
TCGA-US-A776	844	ALIVE	Stage IIA
TCGA-FB-A4P5	179	DEAD	Stage IIB
TCGA-HZ-7926	518	DEAD	Stage IIB
TCGA-IB-A6UF	666	ALIVE	Stage IIB
TCGA-HZ-7918	969	ALIVE	Stage IIB
TCGA-3A-A9IH	1021	ALIVE	Stage IA
TCGA-FB-A78T	375	DEAD	Stage IIB
TCGA-2L-AAQA	143	DEAD	Stage IIB
TCGA-2J-AABE	676	ALIVE	Stage IIA
TCGA-2L-AAQI	103	DEAD	Stage IIB
TCGA-IB-7651	603	DEAD	Stage IIB
TCGA-3A-A9IX	1037	ALIVE	Stage IA
TCGA-F2-7273	360	ALIVE	Stage IIB
TCGA-2J-AAB8	80	ALIVE	Stage IIB
TCGA-HZ-8636	545	DEAD	Stage IV
TCGA-YH-A8SY	388	ALIVE	unknown
TCGA-F2-6880	295	ALIVE	Stage IIB
TCGA-2J-AABO	440	ALIVE	Stage IIB
TCGA-IB-A6UG	41	DEAD	Stage IIB
TCGA-2J-AABP	355	ALIVE	Stage IIB
TCGA-US-A779	511	DEAD	Stage IIB
TCGA-HZ-7920	236	DEAD	Stage IB
TCGA-FZ-5926	541	DEAD	Stage III
TCGA-FB-A545	385	ALIVE	Stage IIB
TCGA-LB-A7SX	393	DEAD	Stage IIB
TCGA-HV-A5A5	289	ALIVE	Stage IIB
TCGA-HZ-8003	596	DEAD	Stage IIB
TCGA-IB-AAUQ	183	DEAD	Stage IIB
TCGA-FB-AAQ1	123	DEAD	Stage IIB
TCGA-HZ-8317	378	DEAD	Stage IIB
TCGA-2J-AABA	607	DEAD	Stage IIB
TCGA-2J-AABV	652	DEAD	Stage IIB
TCGA-2L-AAQM	1383	ALIVE	Stage IIB
TCGA-H6-8124	392	ALIVE	Stage IIB
TCGA-XD-AAUG	420	ALIVE	Stage IV
TCGA-IB-7887	110	DEAD	Stage IIB
TCGA-IB-7652	724	ALIVE	Stage IIB
TCGA-IB-A5SQ	219	DEAD	Stage IB
TCGA-F2-7276	216	DEAD	Stage IIB
TCGA-HZ-A4BK	657	ALIVE	Stage IIB
TCGA-3A-A9IZ	308	DEAD	Stage IIB
TCGA-IB-7886	123	DEAD	Stage IIB
TCGA-IB-AAUV	404	ALIVE	Stage IIB
TCGA-2J-AAB4	729	ALIVE	Stage IIB
TCGA-US-A77J	568	DEAD	Stage IIB
TCGA-Q3-A5QY	416	ALIVE	Stage IIB
TCGA-IB-7646	145	DEAD	Stage IIB
TCGA-HZ-A77O	160	DEAD	Stage IIB
TCGA-2J-AABK	484	ALIVE	Stage IIB
TCGA-HV-A5A4	232	ALIVE	Stage IIA
TCGA-2J-AAB6	293	DEAD	Stage IIA
TCGA-2J-AABT	319	ALIVE	Stage IIB
TCGA-HZ-A77Q	33	ALIVE	Stage IIB
TCGA-IB-7893	117	DEAD	Stage IIA
TCGA-3E-AAAY	2285	ALIVE	Stage IIB
TCGA-HZ-7922	4	ALIVE	Stage IIB
TCGA-RB-A7B8	466	DEAD	Stage IIB
TCGA-HZ-7289	661	DEAD	Stage IIB
TCGA-YY-A8LH	2016	ALIVE	Stage IIB
TCGA-HZ-7923	314	ALIVE	Stage IIA
TCGA-H8-A6C1	671	ALIVE	Stage IIA
TCGA-US-A77G	12	DEAD	Stage IIB
TCGA-3A-A9IC	738	DEAD	Stage IIB
TCGA-IB-A5ST	635	ALIVE	Stage IIB
TCGA-HZ-8637	517	DEAD	Stage IIB
TCGA-FZ-5920	61	DEAD	Stage IIB
TCGA-IB-AAUW	230	DEAD	Stage IIB
TCGA-3A-A9I9	634	DEAD	Stage IIA
TCGA-2J-AABR	438	ALIVE	Stage IIA
TCGA-H6-A45N	397	DEAD	Stage IIB
TCGA-FB-AAQ3	31	DEAD	Stage IIB
TCGA-HV-AA8X	532	DEAD	Stage IIB
TCGA-IB-8126	75	ALIVE	Stage III
TCGA-HV-A7OP	978	ALIVE	Stage IIB
TCGA-HZ-A8P0	0	ALIVE	Stage IIB
TCGA-F2-6879	334	DEAD	Stage IIB
TCGA-S4-A8RO	525	ALIVE	Stage IIB
TCGA-HZ-A49H	491	ALIVE	Stage IIB
TCGA-L1-A7W4	278	DEAD	Stage IIB
TCGA-RL-AAAS	9	ALIVE	Stage IB
TCGA-XN-A8T3	951	ALIVE	Stage IB
TCGA-IB-AAUN	144	DEAD	Stage IB
TCGA-HZ-8005	120	DEAD	Stage IIB
TCGA-XD-AAUL	405	ALIVE	Stage IIA
TCGA-IB-AAUP	431	ALIVE	Stage IIB
TCGA-HV-A5A6	2036	DEAD	Stage IIB
TCGA-HZ-8519	454	ALIVE	Stage IA
TCGA-IB-7885	977	ALIVE	Stage IIB
TCGA-2L-AAQL	292	DEAD	Stage IIB
TCGA-IB-AAUT	287	ALIVE	Stage IIB
TCGA-IB-7644	394	DEAD	Stage IV
TCGA-IB-7889	481	DEAD	Stage IIB
TCGA-2J-AAB1	66	DEAD	Stage IIB
TCGA-HZ-7919	593	DEAD	Stage IIB

## Sheet: S2
Table S2 CIBERSORT algorithm result
ID	B cells naive	B cells memory	Plasma cells	T cells CD8	T cells CD4 naive	T cells CD4 memory resting	T cells CD4 memory activated	T cells follicular helper	T cells regulatory (Tregs)	T cells gamma delta	NK cells resting	NK cells activated	Monocytes	Macrophages M0	Macrophages M1	Macrophages M2	Dendritic cells resting	Dendritic cells activated	Mast cells resting	Mast cells activated	Eosinophils	Neutrophils
TCGA_TCGA-XN-A8T3	0.0493884	0	0.00805309	0.278663	0	0.0471201	0.00934158	0.00659827	0.00114832	0	0	0.00552135	0.0356562	0.0879738	0.105491	0.28287	0.0498865	0	0.0322885	0	0	0
TCGA_TCGA-HZ-7918	0.0489254	0	0.00850753	0.100016	0	0.25493	0.0163856	0.0167537	0.00128618	0.0445836	0	0.00662618	0	0.0510067	0.125	0.177552	0.0531028	0	0.0763082	0	0	0.0190155
TCGA_TCGA-F2-7276	0.105586	0	0.00430811	0.0765177	0	0.17118	0.00344782	0.00325414	0	0.0413492	0	0	0.0173706	0.269978	0.0812745	0.178507	0.000879557	0	0.01784	0	0	0.0285082
TCGA_TCGA-IB-7893	0.0144004	0	0.00208664	0.0122995	0	0.189419	0.006496	0	0	0	0.00960208	0.00588299	0.00503658	0.333058	0.00922258	0.301821	0	0.0400074	0.0663396	0	0.00212339	0.00220481
TCGA_TCGA-2L-AAQE	0.174369	0	0	0.0157223	0	0.120518	0.000206486	0.0619003	0.0627956	0.0266768	0	0	0	0.297854	0.0256958	0.152002	0	0.0229604	0.0393	0	0	0
TCGA_TCGA-HZ-8003	0.0837052	0	0.00541388	0.00851534	0	0.219363	0	0	0	0	0	0.0329296	0.0147241	0.185058	0.105801	0.197443	0.00363228	0	0.113467	0	0.0136858	0.0162625
TCGA_TCGA-YH-A8SY	0	0.0243491	0	0.0288948	0	0.109212	0	0.0353908	0.0327648	0	0	0.0389127	0.00603988	0.340597	0.00799793	0.235543	0	0.0876505	0.025329	0	0.0152997	0.0120188
TCGA_TCGA-M8-A5N4	0	0.00018262	0.00134272	0.0418472	0	0.108264	0	0	0.0157982	0	0	0.0628508	0.0201137	0.279867	0.0964242	0.19732	0	0.0312856	0.0664855	0	0.00428286	0.0739365
TCGA_TCGA-2J-AABT	0.0218584	0	0.000398187	0.0493694	0	0.180158	0.00561484	0	0.0172583	0	0.00323764	0	0.0546256	0.162177	0.0321225	0.374373	0.0261507	0.0241521	0.0441352	0	0	0.00436935
TCGA_TCGA-IB-AAUU	0.0162677	0	0.00437842	0.0555615	0	0.181701	0	0	0.06299	0	0	0.0272969	0.14335	0.102829	0	0.203558	0.0558749	0.0820782	0.0610707	0	0	0.00304352
TCGA_TCGA-IB-A5ST	0.278031	0	0.00770273	0.0755491	0	0.104265	0.0181623	0	0.068128	0	0	0.010368	0	0.197174	0.0166505	0.180212	0	0.00606546	0.00955219	0	0	0.0281396
TCGA_TCGA-3A-A9IU	0.0933084	0	0.008748	0.00827615	0	0.0611816	0.000458379	0.0625868	0.0417164	0.0109676	0	0	0	0.566699	0.0458608	0.0558212	0	0.000781516	0.0435938	0	0	0
TCGA_TCGA-2J-AAB1	0.0429265	0	0.0026248	0.0933785	0	0.272904	0	0	0.0135565	0	0	0.0445095	0.0537471	0.0324464	0.195858	0.168352	0.0256534	0	0.0500274	0	0.00401582	0
TCGA_TCGA-IB-A6UG	0.172324	0	0	0.101419	0	0.126905	0.000557235	0.0819921	0.0771208	0	0	0.0302104	0.0264491	0.0903472	0.0398778	0.0883297	0.0214925	0.00946322	0.127554	0	0.00093931	0.00501859
TCGA_TCGA-3A-A9J0	0.0932179	0	0.0120692	0	0	0.0906288	0	0.040831	0.0177709	0.0323678	0	0.0494831	0	0.420754	0.0262672	0.199645	0	0	0	0.0161595	0	0.000805571
TCGA_TCGA-IB-AAUQ	0.103757	0	0.0246249	0.0226426	0	0.151598	0	0	0.0511439	0	0.0192149	0.0167966	0	0.368921	0.0128932	0.158602	0	0	0.0698057	0	0	0
TCGA_TCGA-Q3-AA2A	0.0119416	0.00842439	0	0.0150872	0	0.127765	0	0	0.0090215	0	0.00652476	0.0403217	0.00217364	0.413788	0.0244177	0.227183	0.0329688	0	0.0627417	0	0.0176413	0
TCGA_TCGA-FB-AAQ2	0.165261	0	0	0.0405653	0	0.138068	0	0.0381617	0.0352413	0	0	0.0204744	0.00102768	0.25038	0.0207011	0.184174	0.00217924	0.0503954	0.0316251	0	0.0217461	0
TCGA_TCGA-IB-7649	0.0427606	0	0.00620716	0.0309731	0	0.196101	0.00843425	0	0.0264698	0.0232795	0	0.0489477	0.154201	0.0504144	0.0233826	0.149951	0.0797121	0.00638878	0.14999	0	0	0.0027876
TCGA_TCGA-F2-A8YN	0.0177883	0	0	0.0422769	0	0.13748	0	0	0.0212064	0	0	0.0324389	0.052098	0.274129	0.00230311	0.241533	0.0836627	0.018413	0.0474712	0	0	0.0291999
TCGA_TCGA-HZ-A49I	0.070558	0	0.00792991	0.0135202	0	0.0526572	0.000500678	0.00954643	0.0392233	0	0.0220952	0	0.345313	0.338228	0.00604176	0.0765597	0	0.0120583	0	0.00576873	0	0
TCGA_TCGA-HV-A5A4	0.0327349	0	0.00979478	0.0101565	0	0.143163	0	0.000327398	0.0427432	0.00393082	0	0.0429014	0	0.344761	0.0705041	0.222917	0	0	0.0669188	0	0	0.00914651
TCGA_TCGA-HZ-8636	0.0172306	0	0.00262589	0.00396283	0	0.169734	0.00937406	0.0026013	0.0186029	0.034789	0	0	0.0811593	0.140984	0.0261448	0.323263	0.0626303	0.0357185	0	0.0593047	0.000708335	0.0111661
TCGA_TCGA-FB-A4P5	0.185012	0	0.0306061	0.274469	0	0.15204	0.0122812	0.0298226	0.0166846	0.0174835	0	0	0.00647934	0.0191464	0.0449294	0.164681	0.0298735	0.0164915	0	0	0	0
TCGA_TCGA-2L-AAQA	0.0217467	0	0.00637662	0	0	0.198866	0	0	0.0525672	0.0169453	0.00454765	0	0	0.413286	0.0211778	0.180706	0.0177406	0.019002	0	0.0470373	0	0
TCGA_TCGA-HZ-A4BH	0.0800122	0	0	0.0291396	0	0.0985507	0.00603703	0.0441504	0.0470369	0.0207358	0	0.014196	0	0.215487	0.144195	0.216123	0.0148831	0	0.0440022	0	0.0254514	0
TCGA_TCGA-2J-AABR	0.0454798	0	0.00205585	0.192531	0	0.247701	0.00802692	0	0.0208069	0	0	0.0315979	0.0497165	0.0624932	0.0740328	0.162713	0.0396156	0	0.0325567	0	0.0164235	0.0142493
TCGA_TCGA-IB-A5SP	0.00468455	0	0.00388096	0.0152473	0	0.218607	0	0	0.00744245	0	0.0303302	0.0296562	0	0.203937	0.0328691	0.293413	0.0961228	0.0133993	0.0504104	0	0	0
TCGA_TCGA-IB-AAUN	0.189018	0	0.116148	0.0919435	0	0.0458897	0.00790741	0.0166294	0.0182444	0	0.00170057	0.0268562	0.0180405	0.0119052	0.135144	0.176226	0.063668	0.0123537	0.0612561	0	0.00706916	0
TCGA_TCGA-HZ-A49G	0.069647	0	0.0061562	0.0103476	0	0.0414217	0	0.0050262	0.0397247	0.0231959	0.00772341	0	0.0684736	0.451132	0.0280274	0.203814	0.00855779	0	0.0367518	0	0	0
TCGA_TCGA-S4-A8RP	0.0322877	0	0.00282007	0.105578	0	0.131992	0.015779	0.00856526	0.00287631	0	0.0251855	0	0.0568384	0.0793564	0.152103	0.251993	0.0799643	0	0.0480502	0	0	0.00661029
TCGA_TCGA-HZ-A49H	0.105878	0	0.0133173	0.0578418	0	0.271052	0.0523048	0	0	0.096044	0	0	0.00575871	0	0.0564227	0.191557	0.0547942	0.0310101	0.0291826	0.0116193	0	0.0232179
TCGA_TCGA-IB-AAUP	0.312491	0.0542094	0	0.0812224	0	0.162857	0.0101008	0.0285459	0.0196774	0.0241806	0	0	0	0.141181	0.0250401	0.114705	0	0.00711972	0.0186703	0	0	0
TCGA_TCGA-IB-7652	0.00256371	0	0.000164518	0.0172121	0	0.0906514	0	0.00895167	0.0299688	0	0.0307305	0	0.186626	0.163581	0.0115079	0.326369	0.0285097	0.00187237	0.101292	0	0	0
TCGA_TCGA-HZ-A77Q	0.219289	0	0.00230104	0.0158544	0	0.173429	0.00557562	0	0.0350754	0	0	0.0131976	0.0442438	0.134587	0.00923231	0.144629	0.0317983	0.0439819	0.0506387	0	0.0350723	0.0410953
TCGA_TCGA-FB-A545	0.0904557	0	0.00837195	0	0	0.11333	0	0.00901935	0.0581062	0	0	0.0385644	0	0.541487	0.018002	0.0706206	0	0	0.052043	0	0	0
TCGA_TCGA-LB-A9Q5	0.000646197	0.00315552	0.00123629	0.0529961	0	0.0767365	0	0.0288171	0.0421697	0	0	0.0532527	0.055626	0.161685	0.0109648	0.287994	0.0525956	0.0253807	0.0366611	0	0.0060498	0.104033
TCGA_TCGA-HZ-A8P0	0.0935579	0	0.00680043	0.0713328	0	0.1769	0	0.0189799	0.0925484	0	0.0211969	0	6.18325e-05	0.311994	0.024494	0.119385	0	0	0	0.0356266	0	0.0271223
TCGA_TCGA-S4-A8RO	0.0258204	0	0.00529435	0.0348231	0	0.101992	0.00345835	0	0.0117665	0.00892514	0	0.0153511	0.00822375	0.2446	0.0280171	0.400103	0	0.06016	0.0514659	0	0	0
TCGA_TCGA-3A-A9IC	0.113208	0	0.0264568	0.0691155	0	0.145258	0	0.00987315	0.00547242	0	0	0.0389341	0	0.162474	0.00764591	0.281281	0.0433412	0.0131447	0.0511084	0	0	0.0326866
TCGA_TCGA-HZ-8519	0.0359688	0	0.00534219	0.165839	0	0.207848	0	0	0	0.0316988	0	0.00551017	0.000509865	0.142068	0.0921521	0.22209	0.0073466	0	0.0791881	0	0	0.00443879
TCGA_TCGA-HV-AA8V	0.0891041	0	0.00779883	0.0347316	0	0.153426	0	0	0.0326928	0	0	0.0336579	0.00119313	0.283268	0	0.187225	0.0202768	0.0275144	0.115066	0	0	0.0140466
TCGA_TCGA-Q3-A5QY	0.225599	0.0441155	0	0.146119	0.0515586	0.11918	0.0681316	0	0.105094	0.000274776	0	0.00137189	0.0182541	0.0562841	0.0163343	0.116607	0.000993283	0.0212172	0	0	0.00864994	0.00021552
TCGA_TCGA-HZ-A9TJ	0.0650092	0	0.00638581	0.0952116	0	0.156806	0	0.0230085	0.0880434	0	0	0.0413716	0.023071	0.22028	0.0382068	0.222295	0	0.00175149	0.0103839	0	0.00817533	0
TCGA_TCGA-FB-AAPS	0.118232	0	0	0.110776	0	0.154273	0	0.0268149	0.0562454	0	0	0.0380235	0.000937048	0.185624	0.0386075	0.205639	0.015282	0.00304315	0.0426558	0	0	0.00384608
TCGA_TCGA-IB-AAUS	0.0774484	0	0.00695786	0.0223707	0	0.159442	0.000682977	0	0.0237116	0	0.00288503	0.0283725	0.0181608	0.141582	0.00897301	0.335682	0.0326731	0.0292191	0.0580758	0	0.0218224	0.0319401
TCGA_TCGA-FB-AAQ1	0	0.0217447	0	0.0678462	0	0.134215	0	0	0.0275428	0	0	0.0460727	0.0679539	0.217732	0.0177287	0.270986	0.0620277	0.0179041	0.0482469	0	0	0
TCGA_TCGA-IB-7888	0.161169	0	0.0408242	0.0910144	0	0.173022	0.0311287	0	0.00936881	0.00559889	0	0	0.11186	0	0.0337775	0.203797	0.033729	0.00332683	0.0354118	0	0	0.0659719
TCGA_TCGA-F2-7273	0.0576554	0	0.00629488	0.0541335	0	0.281847	0.00976167	0	0	0.00152748	0.00399928	0	0.0705094	0.0046493	0.0455873	0.315806	0.0278482	0.0159381	0.078755	0	0.00722123	0.0184657
TCGA_TCGA-2L-AAQI	0.0313885	0	0.00819473	0	0	0.142517	0	0.0102158	0.0946634	0	0.0586321	0	0	0.391308	0.0348273	0.175595	0	0	0	0.0396726	0	0.0129855
TCGA_TCGA-XD-AAUG	0.126301	0	0.0182868	0	0	0.322368	0	0	0.0115457	0	0	0.0230992	0.0161244	0.0301936	0	0.218851	0.0162439	0.0420808	0.173607	0	0	0.00129913
TCGA_TCGA-IB-AAUT	0.0697609	0	0.00893833	0.158873	0	0.219905	0	0	0.0104719	0	0	0.0549534	0.0194555	0.0792133	0.0643543	0.129155	0.0810817	0	0.0973313	0	0	0.00650671
TCGA_TCGA-Z5-AAPL	0.289471	0.151082	0	0.182235	0.0094388	0.0341649	0.0866648	0.0251455	0.0255787	0.043691	0	0	0	0.0299919	0.0241704	0.0554993	0	0.0356803	0	0	0.00718623	0
TCGA_TCGA-HZ-A4BK	0.0163079	0	0	0.132249	0	0.109381	0	0	0.0475249	0	0	0.00867557	0.0579703	0.298759	0.0447648	0.155748	0.0443592	0	0.0829899	0	0	0.00127064
TCGA_TCGA-IB-7889	0.092077	0	0	0.159929	0	0.105461	0.0126082	0.0145141	0.0286945	0.0137439	0	0.0184192	0.0681299	0.172052	0.0421887	0.15985	0.0168474	0.0149764	0.0657874	0	0	0.0147213
TCGA_TCGA-IB-AAUR	0.341133	0	0	0.200022	0	0.0835251	0.0433634	0	0.0818178	0	0	0.00789653	0.0116356	0.087166	0.00559409	0.0635034	0	0.0444255	0.025561	0	0	0.00435649
TCGA_TCGA-IB-A7M4	0.0770187	0	0	0.214255	0	0.0309993	0	0.0403506	0.097661	0.0372651	0	0	0	0.252079	0.0802809	0.115417	0	0.0331481	0.0176396	0	0	0.00388574
TCGA_TCGA-3A-A9IH	0.0214191	0.0225061	0	0.0350269	0	0.126529	0	0.0397546	0.0505301	0	0.00197101	0	0.00655897	0.162129	0.0972334	0.260024	0.0937856	0.0504053	0	0	0.010556	0.0215716
TCGA_TCGA-HV-A5A6	0.0184503	0	0.00749547	0.0156877	0	0.153829	0	0	0.020727	0	0	0.0310109	0.000469947	0.508688	0.0205056	0.155793	0	0.0300962	0.0352935	0	0	0.00195347
TCGA_TCGA-HZ-8001	0.0971412	0	0.0669813	0.124739	0	0.0439885	0.0317104	0.0345788	0.0310605	0.0181315	0	0.0330989	0.0221444	0.0351254	0.0160421	0.255897	0.0270101	0.0103528	0.0607758	0	0.051389	0.0398333
TCGA_TCGA-3E-AAAZ	0.0551594	0	0.00318035	0.0929543	0	0.166639	0	0.0384329	0.0104378	0	0.0311135	0.00313886	0.0279683	0.136861	0	0.230906	0.032551	0.0186038	0.133282	0	0.0138798	0.00489197
TCGA_TCGA-IB-7885	0.0158845	0.0123031	0	0.0742514	0	0.174893	0	0.00226071	0.0401533	0	0	0.0681676	0	0.108334	0.0562041	0.221272	0.0788941	0.0054218	0.0620794	0	0	0.0798809
TCGA_TCGA-US-A779	0.0400015	0	0.0138314	0.0419256	0	0.201715	0	0	0.0108091	0	0	0.0619867	0	0.249087	0.0154328	0.294625	0.00505849	0.0110724	0.0544553	0	0	0
TCGA_TCGA-HZ-7925	0	0	0.00193942	0	0	0.133466	0	0.0262122	0.0696139	0	0.00031511	0.0138693	0	0.233518	0.00124045	0.312548	0.0063916	0.0563297	0.0220072	0	0.0567024	0.0658459
TCGA_TCGA-IB-7886	0.0173578	0	0.000991576	0.0607592	0	0.191014	0.0481043	0.00368099	0	0.000961687	0	0.00603162	0.0257175	0.129672	0.125803	0.295062	0.0169046	0.000721223	0.0590454	0	0	0.0181731
TCGA_TCGA-IB-8127	0.0368728	0	0.00432254	0.0927613	0	0.136768	0.0184435	0	0.0316685	0.0521843	0	0	0.0242124	0.158325	0.0543103	0.27142	0.048915	0.0120347	0.0404208	0	0.0137304	0.00361031
TCGA_TCGA-HZ-8637	0.0432801	0	0	0.04819	0	0.155579	0.0264677	0	0.0204175	0.00499018	0	0.0307688	0.00320271	0.151758	0.21453	0.17374	0.0355297	0	0.0715496	0	0	0.0199971
TCGA_TCGA-HZ-A77P	0.0288361	0	0	0.159257	0	0.0950071	0.00980438	0	0.0136262	0	0.00476927	0	0.0284646	0.0258198	0.0408556	0.42789	0.0839582	0.0109343	0.0707771	0	0	0
TCGA_TCGA-IB-7646	0.0173842	0	0.00191821	0.0517408	0	0.123655	0.0159812	0.015745	0.00103164	0	0.00601838	0.0113043	0	0.1019	0.106305	0.25143	0.00266552	0.119211	0.0666974	0	0.0179053	0.0891078
TCGA_TCGA-HV-A5A3	0	0.026948	0.00474	0	0	0.201829	0	0.00370052	0.0703318	0	0.0140107	0.0215078	0	0.17426	0.0344907	0.376572	0.0254332	0.0240432	0.0221331	0	0	0
TCGA_TCGA-HZ-8005	0.0127065	0	0.0119222	0.031414	0	0.162235	0.00555967	0	0.00199591	0	0.0241005	0.0642693	0.0124424	0.103235	0.171341	0.27886	0.00125758	0	0.0977747	0	0.00725725	0.0136297
TCGA_TCGA-2J-AAB9	0.0517729	0	0.00809083	0.0142883	0	0.247707	0	0	0.0281108	0	0	0.0336933	0.0206259	0.0848075	0.042075	0.211233	0.0784764	0.0236623	0.149096	0	0	0.00636058
TCGA_TCGA-XN-A8T5	0.276071	0	0	0.256503	0	0.112365	0	0.0133175	0.0520622	0	0	0.0609978	0.0562091	0.0155338	0.00379202	0.0829963	0	0.0269355	0.0432158	0	0	0
TCGA_TCGA-L1-A7W4	0.0263713	0	0.00578767	0.0253519	0	0.13638	0	0.0764125	0.0400942	0	0	0.0412522	0	0.3529	0.0162011	0.160437	0	0.0706493	0.0364932	0	0.00199075	0.00967875
TCGA_TCGA-IB-AAUV	0.0925779	0	0	0.211705	0	0.155463	0.00588188	0	0.000697744	0.0503103	0	0.0150454	0.0423251	0.0432905	0.0243529	0.243362	0.0945066	0	0.0074188	0	0.00578772	0.00727558
TCGA_TCGA-FB-AAQ3	0	0.0116605	0	0.134345	0	0.047287	0.0209209	0	0.0173662	0	0	0.0320202	0.0116062	0.152894	0.0851698	0.268928	0.0506156	0.077917	0.0892703	0	0	0
TCGA_TCGA-RL-AAAS	0.140306	0	0	0.205306	0	0.10845	0	0.014181	0.034092	0.00418363	0	0.058308	0.0452769	0.0253055	0.0515592	0.0933743	0.125944	0	0.0937124	0	0	0
TCGA_TCGA-IB-7890	0.0651111	0	0.00955561	0	0	0.114344	0.00365067	0	0.0337427	0	0.0310851	0	0	0.388513	0.00400051	0.255396	0.0145471	0	0.0661978	0	0	0.0138565
TCGA_TCGA-XD-AAUI	0.218957	0	0	0.0790319	0	0.135021	0.015831	0.0108133	0.0653602	0	0	0	0.00163238	0.189661	0.0269044	0.201529	0.00776851	0.033095	0.0143949	0	0	0
TCGA_TCGA-2J-AABK	0.131583	0	0.0221805	0.14851	0	0.114474	0	0.0359662	0.00531456	0	0	0.0477204	0.00347806	0.133949	0.0760857	0.190142	0.0147997	0.00677451	0.0690217	0	0	0
TCGA_TCGA-IB-A5SS	0.0257044	0	0	0.0523511	0	0.0937988	0	0.00371884	0.0149261	0	0.00236385	0.010578	0	0.334392	0.0218636	0.33496	0	0.0254104	0.0423756	0	0	0.0375582
TCGA_TCGA-FB-AAPZ	0.0547611	0	0	0.106293	0	0.144186	0.0148197	0.00898664	0.035289	0.00215532	0	0.0250898	0.00700069	0.18992	0.0381075	0.240607	0.0554135	0.0236927	0.0405868	0	0.0013156	0.011776
TCGA_TCGA-2J-AABI	0.212346	0	0	0.0258534	0	0.0628929	0.036467	0.0100935	0.106584	0.0212261	0	0.035806	0	0.270377	0.0217239	0.144926	0	0.0328417	0	0.00612705	0	0.0127363
TCGA_TCGA-HZ-7920	0.153375	0	0	0.0728747	0	0.273772	0.0546558	0	0	0	0	0.0105268	0.0520527	0	0.0470147	0.193071	0.067768	0	0.0604015	0	0	0.0144882
TCGA_TCGA-HZ-7922	0.0592382	0	0	0.0776982	0	0.176745	0	0.0183228	0.0234411	0	0	0.036083	0.067096	0.0315062	0.0766353	0.170882	0.125842	0.019011	0.0771212	0	0.00665869	0.0337202
TCGA_TCGA-OE-A75W	0.0448408	0	0.0158429	0.174991	0	0.121776	0	0.0126058	0.0313433	0.0108194	0	0.0454656	0	0.169248	0.0878614	0.19101	0.0127653	0.0335338	0.0378898	0	0	0.0100069
TCGA_TCGA-2J-AABU	0.0945762	0	0	0.0261263	0	0.246127	0	0	0.0282958	0	0.0470528	0.0441403	0.0167358	0.122543	0.0202575	0.24254	0	0.0348371	0.0767677	0	0	0
TCGA_TCGA-RB-AA9M	0.0644161	0	0.00742028	0.125049	0	0.256484	0	0.0111868	0.00270785	0	0	0.0425733	0.0992229	0.0877821	0.0572757	0.155339	0.0648287	0.00457597	0.00611062	0	0.00893376	0.00609345
TCGA_TCGA-2J-AABH	0.0824719	0	0.0154725	0.0172591	0	0.15024	0	0.00390344	0.00849379	0	0	0.0361395	0.0601919	0.0856506	0.0538371	0.249499	0.156807	0	0.0582807	0	0	0.0217533
TCGA_TCGA-IB-7645	0.0378389	0	0	0.0776112	0	0.23026	0.0112743	0	0	0.0450412	0	0	0.0223884	0.142027	0.0475859	0.257203	0.030447	0.0178764	0.0502493	0	0	0.0301983
TCGA_TCGA-2J-AABA	0.245459	0	0.0187777	0.00265903	0	0.404056	0	0	0.00773206	0.00665384	0.0220086	0	0	0.0908436	0.00874442	0.105549	0.0110427	0.0383976	0.0380769	0	0	0
TCGA_TCGA-FB-AAPQ	0.0141642	0	0.0151434	0.0664492	0	0.069585	0.0013053	0.0441049	0.0406044	0	0.065042	0	0	0.450115	0.0350742	0.0239426	0	0	0	0.167809	0.00666121	0
TCGA_TCGA-2L-AAQL	0.00539851	0.000292145	0.00851696	0.0112439	0	0.221344	0	0.0117075	0.0224039	0.0382871	0	0.0504656	0.00098566	0.110433	0.0770583	0.321323	0.0169761	0	0.101804	0	0.00176117	0
TCGA_TCGA-H6-A45N	0.058451	0	0	0.0436559	0	0.14025	0	0	0.0188167	0.0232824	0	0.0181358	0.00259674	0.383538	0.0827115	0.171961	0.00833467	0	0.0454848	0	0.0027822	0
TCGA_TCGA-F2-A44H	0.015172	0	0.00165534	0	0	0.118017	0	0.00464302	0.0734567	0	0.00331097	0	0.00676649	0.457936	0.0252162	0.211062	0.0389065	0	0.000910786	0.0353458	0	0.00760202
TCGA_TCGA-IB-7644	0.0166216	0	0.00174598	0.0332816	0	0.331744	0	0	0.0268571	0.0122697	0	0.0508516	0.00570316	0.0314878	0.0212925	0.179581	0.161233	0.0296032	0.0613459	0	0	0.036381
TCGA_TCGA-3A-A9IB	0	0.010948	0	0.0126327	0	0.144879	0	0.0100851	0.00843307	0.0220199	0	0.0413409	0	0.207167	0.06138	0.364854	0.0160788	0.0136026	0.0669433	0	0	0.0196361
TCGA_TCGA-HZ-7919	0.0512792	0	0.0117921	0.0334234	0	0.225466	0	0.00399603	0.0160651	0	0	0.0525593	0.0191581	0.0140939	0.103866	0.26526	0.0332191	0.0020231	0.1678	0	0	0
TCGA_TCGA-IB-AAUM	0.119589	0	0.00769149	0.15562	0	0.103886	0.000161948	0.0200672	0.0158183	0	0.0142463	0	0.0108021	0.265085	0.0288493	0.227489	0	0	0.0306945	0	0	0
TCGA_TCGA-2J-AABV	0.124782	0	0.0184738	0.10223	0	0.196198	0	0.00956174	0.013978	0	0	0.0477863	0.08801	0	0.0184667	0.172749	0.0201354	0.0250771	0.154411	0	0	0.00814053
TCGA_TCGA-2L-AAQJ	0.192137	0	0	0.0475919	0	0.155119	0	0.0490735	0.0443388	0	0	0.0167876	0.00485196	0.244777	0.0532695	0.150435	0.0209529	0	0	0.0179603	0.00270522	0
TCGA_TCGA-3A-A9I9	0.0207342	0	0.00266121	0.121595	0	0.121914	0	0.00316321	0.0200616	0	0	0.0403987	0.0190223	0.118408	0.0449261	0.334081	0.074801	0	0.0484587	0	0	0.0297745
TCGA_TCGA-FB-AAPY	0.0688656	0.028188	0	0.123769	0	0.141127	0	0.0132606	0.0836135	0	0	0.0407124	0.00518374	0.0575997	0.0432215	0.217172	0.0977686	0.0282932	0.0343272	0	0	0.0168981
TCGA_TCGA-3E-AAAY	0.0448316	0	0.00538563	0.057032	0	0.235889	0.00154666	0	0.0291642	0	0	0.0324274	0.00614772	0.101255	0.0708773	0.287833	0.0596592	0	0.0104471	0.0066202	0	0.0508837
TCGA_TCGA-IB-7654	0.0842864	0	0	0.0438801	0	0.151426	0	0	0.0281163	0.011835	0	0.0265631	0.00203509	0.129059	0.0928803	0.252437	0.104146	0	0.0733357	0	0	0
TCGA_TCGA-FB-A78T	0	0	0.00144765	0.0580051	0	0.139292	0	0.00664169	0.0261341	0	0	0.0152905	0.124343	0.230676	0.057093	0.202542	0.0874458	0	0.0510894	0	0	0
TCGA_TCGA-2J-AAB8	0.0918088	0	0	0.0817202	0	0.101781	0	0.0349825	0.0202711	0.00794558	0	0.0284883	0	0.251662	0.0515966	0.219533	0.0386983	0.0364943	0.0331394	0	0	0.00187945
TCGA_TCGA-FB-A7DR	0.0776438	0	0.00643932	0.0355185	0	0.0771073	0.0204832	0.01238	0.00301694	0.00703795	0	0.0656112	0	0.11169	0.0647234	0.240868	0	0.129764	0.106863	0	0	0.0408533
TCGA_TCGA-2J-AABE	0.0305806	0	0.00203749	0.0123207	0	0.109664	0	0.00823586	0.0431093	0	0	0.0198806	0.1138	0.259968	0.00437537	0.270182	0.0559392	0.0207816	0.0273398	0	0.000521582	0.0212643
TCGA_TCGA-RB-A7B8	0.0118172	0.0211765	0	0.041363	0	0.206745	0	0.0139412	0.0157505	0	0	0.0954347	0	0.188015	0.0825082	0.220737	0.0595265	0	0.0429847	0	0	0
TCGA_TCGA-2J-AABO	0.0560776	0	0	0.0562004	0	0.275322	0	0	0.0207746	0.0170117	0	0.0343784	0.00379369	0.190536	0.0460598	0.185734	0.0167347	0.0198138	0.0775626	0	0	0
TCGA_TCGA-FB-A5VM	0.089414	0	0.00222427	0.0950335	0	0.0968657	0.00247565	0.036345	0.017296	0.0036217	0	0.00921654	0.0183621	0.26777	0.0280537	0.218571	0.0233247	0.0507175	0.0405352	0	0	0.000173816
TCGA_TCGA-HZ-8315	0.0366544	0	0.0036199	0.0701692	0	0.195174	0.0179737	0	0	0.00811028	0	0.0166417	0	0.0985682	0.180781	0.208137	0.0345217	0.0028311	0.0931198	0	0.0169994	0.0166996
TCGA_TCGA-3A-A9IX	0.119659	0	0	0.207333	0	0.129246	0	0	0.0532458	0.00423003	0	0.00977317	0.0974117	0	0	0.185142	0.0556343	0.0995499	0.0358209	0	0	0.00295461
TCGA_TCGA-XD-AAUH	0.21065	0.0364937	0	0.24602	0	0.17943	0.0137393	0	0.0169911	0	0	0.00356541	0.0248424	0.024581	0.0228207	0.1888	0.00726743	0.0133846	0.0114145	0	0	0
TCGA_TCGA-HZ-A77O	0.00595314	0	0.00382662	0.0382951	0	0.0735279	0	0.0322049	0.0274711	0	0	0.033302	0.013355	0.179343	0.0767271	0.339132	0.0954408	0.0121269	0.0570609	0	0	0.0122339
TCGA_TCGA-IB-A5SO	0.078484	0.0326724	0	0.029275	0	0.264121	0	0	0.0091974	0	0	0.0261962	0	0.295028	0.0228871	0.139151	0	0.0388201	0.0641687	0	0	0
TCGA_TCGA-F2-6879	0.00189991	0	0.00496848	0.0510529	0	0.225152	0	0.0148795	0	0.0214111	0	0.00246684	0.0385589	0.128399	0.0852428	0.226899	0.0665305	0.0459412	0.0717238	0	0.00729752	0.00757651
TCGA_TCGA-2J-AAB4	0	0	0.00383148	0.0744241	0	0.217542	0.00187738	0	0.0195708	0	0	0.0253891	0.0408484	0.0367266	0.120913	0.264556	0.120932	0.0248428	0.0485464	0	0	0
TCGA_TCGA-US-A774	0.106952	0	0.00396191	0.0613747	0	0.0913648	0	0	0.0096937	0.0174164	0	0.0700137	0	0.121235	0.0709051	0.26051	0.0729535	0	0.0917879	0	0	0.0218306
TCGA_TCGA-IB-8126	0.111108	0	0	0.197043	0	0.212504	0.0276265	0	0	0.130445	0	0	0.0305997	0	0.0532213	0.161516	0.00929987	0.0127455	0.0195592	0	0.0304713	0.00386142
TCGA_TCGA-IB-AAUO	0.00327463	0.00757046	0.00108203	0.0921542	0	0.156504	0	0.0160314	0.0834433	0	0	0.101637	0.0105159	0.0557084	0.06095	0.156379	0.0418585	0.123025	0.0792274	0	0	0.0106384
TCGA_TCGA-2J-AAB6	0	0.0206799	0	0.0322873	0	0.105803	0.000837908	0.00876677	0	0	0	0.00687657	0.0297182	0.169097	0.0945463	0.415471	0	0.00525332	0.0559869	0	0.0432142	0.0114614
TCGA_TCGA-2J-AABF	0.0366832	0	0.00247779	0.0688018	0	0.146424	0	0	0.0352924	0	0	0.0372606	0.0116238	0.0687437	0.130166	0.262036	0.0682206	0	0.0624077	0	0	0.0698629
TCGA_TCGA-HZ-8002	0.0344613	0	0.00101697	0.107912	0	0.231249	0	0	0	0.0176742	0	0.0262754	0.119343	0.0134661	0.0173299	0.297342	0.0390887	0.0266072	0.0564102	0	0	0.0118254
TCGA_TCGA-IB-7891	0.0780311	0	0.0642801	0.0913247	0	0.101511	0.0252852	0	0.0142885	0.0142984	0	0.0243544	0.00234033	0.102219	0.10024	0.2144	0.0765093	0	0.0751683	0	0	0.0157506
TCGA_TCGA-YB-A89D	0.00739614	0	0.0041707	0	0	0.27373	0	0	0.0141645	0	0.00405755	0.0225223	0.0242896	0.131885	0.00936232	0.291824	0.0554628	0.125091	0.00730697	0.0216365	0.00201106	0.00509046
TCGA_TCGA-IB-A5SQ	0.0446908	0	0	0.028812	0	0.120565	0.00890452	0.0231994	0.0229282	0	0	0	0.010987	0.306136	0.0568361	0.248385	0.0636444	0.0187714	0.0389644	0	0	0.00717518
TCGA_TCGA-US-A77J	0.373761	0	0.0269032	0.118748	0	0.0212492	0	0.0528979	0.0586465	0.0444955	0	0.0279526	0	0.0912771	0.0342183	0.102725	0.029414	0	0.0143138	0	0	0.00339757
TCGA_TCGA-PZ-A5RE	0.00654996	0.00972484	0	0.0208887	0	0.11401	0	0.000963281	0.0269433	0	0.00548934	0	0	0.332912	0.00950015	0.274602	0.10448	0.0265454	0.0378163	0	0.00772263	0.021852
TCGA_TCGA-HV-A7OL	0.192552	0	0.0253779	0.114129	0	0.0361482	0	0.08238	0.0657703	0	0	0.0645359	0	0.111899	0.0594041	0.115957	0.0160699	0.0123361	0.0735441	0	0	0.0298979
TCGA_TCGA-IB-7897	0.0549326	0	0.00807913	0.146744	0	0.259949	0.0255347	0	0	0.0681734	0	0	0.0600311	0	0.038061	0.237673	0.00131605	0.0374237	0.0292488	0	0.00625143	0.0265826
TCGA_TCGA-3A-A9I7	0.143035	0	0	0.128153	0	0.129151	0	0.0130602	0.0629656	0.00126372	0	0.0677333	0	0.102365	0.0657942	0.17316	0.0288948	0	0.0844237	0	0	0
TCGA_TCGA-F2-A7TX	0.0412191	0	0	0.208857	0	0.0729963	0.111757	0.018563	0	0	0.0132187	0.0289491	0.00161355	0.0220331	0.163514	0.221547	0.00782614	0.00753556	0.0799078	0	0	0.000462758
TCGA_TCGA-XD-AAUL	0.000378321	0	0.00213842	0.0468157	0	0.16163	0	0.0120481	0.0701455	0	0	0.0463668	0.00782295	0.15072	0.0155566	0.279472	0.0987069	0.0114701	0.0513658	0	0	0.0453622
GSE57495_GSM1383779	0.069851	0	0.0303408	0.215519	0	0.261092	0	0.00297089	0.0472083	0	0.0462927	0	0.0628258	0	0.0654292	0.158626	0.010718	0.00430017	0.0248262	0	0	0
GSE57495_GSM1383780	0.00579158	0	0	0	0	0.159165	0	0.0373747	0.0203894	0	0.0266233	0.00543319	0	0.563661	0	0.168623	0	0.00362443	0.00931389	0	0	0
GSE57495_GSM1383781	0.188094	0	0.00232638	0.129241	0	0.29809	0	0	0.00973157	0	0	0.0334944	0.0163806	0.0454853	0.0120771	0.132392	0.0447192	0.0183717	0.0356692	0	0	0.0339277
GSE57495_GSM1383782	0.0407811	0	0.000653627	0.0654445	0	0.170729	0	0	0.00708667	0	0.0145864	0	0.000581087	0.421475	0	0.220544	0	0.0248217	0.0307949	0	0	0.00250207
GSE57495_GSM1383783	0.0146261	0.026635	0	0.0493143	0	0.0470056	0	0.0216317	0.0412415	0	0	0.043281	0.0174608	0.438689	0.0421033	0.207219	0	0	0.0324854	0	0	0.018307
GSE57495_GSM1383784	0.00193662	0	0.00243185	0	0	0.0456139	0	0.0111614	0.0202317	0.0190435	0	0.0244194	0.0552201	0.326916	0.00235087	0.187023	0.0127566	0.00637336	0	0.0485233	0.0290238	0.206975
GSE57495_GSM1383785	0.0248289	0	0.00282521	0.0342658	0	0.213378	0	0.0219132	0.101566	0	0.0401466	0.0183424	0.00479144	0.270063	0.0111684	0.156317	0	0.04693	0.0376565	0	0	0.0158077
GSE57495_GSM1383786	0.26005	0	0.0929424	0.0579882	0	0.0954879	0.0287636	0.035128	0.0327676	0	0	0	0.0339759	0.049935	0.013896	0.168124	0.0193859	0.0767224	0.0348322	0	0	0
GSE57495_GSM1383787	0.029377	0	0.0096069	0.108519	0	0.139656	0	0.0260179	0.03283	0	0.0112435	0.0207615	0	0.055867	0.075458	0.375846	0.023629	0	0.0911875	0	0	0
GSE57495_GSM1383791	0.00796302	0.0122918	0.000808083	0.149269	0	0.129931	0	0	0.0353271	0	0	0.0241825	0.047602	0.0193426	0.0189259	0.385228	0.0673987	0.0179174	0.0838129	0	0	0
GSE57495_GSM1383792	0.00643043	0	0.00157164	0.360924	0	0.132835	0.00834809	0.00474391	0.0566778	0	0	0.0369714	0.006793	0.0857521	0.0834287	0.159732	0.00593235	0	0.04986	0	0	0
GSE57495_GSM1383794	0.0267946	0	0.00169658	0.129587	0	0.258043	0	0.0123272	0.0266001	0	0	0.0521774	0.0129865	0.0262635	0.19825	0.114004	0.113051	0	0.0184636	0	0.00975564	0
GSE57495_GSM1383795	0.211075	0	0.0122163	0.0755602	0	0.253924	0.0768048	0.0247805	0.0155722	0	0.0418437	0	0.0488884	0.0340575	0.010638	0.0917533	0	0.028451	0.0295709	0	0	0.0448637
GSE57495_GSM1383797	0.0712136	0	0	0.0208564	0	0.199726	0	0.00419498	0.00395901	0.0182252	0	0.056767	0	0.113349	0.0631619	0.17025	0.0657724	0	0.079671	0	0.0336385	0.0992151
GSE57495_GSM1383798	0.0193512	0	0.00234226	0.0605144	0	0.192419	0.00582744	0	0.00869489	0	0.0267572	0	0	0.403935	0.0376897	0.218352	0	0	0.0241163	0	0	0
GSE57495_GSM1383799	0.118424	0	0	0.121637	0	0.242042	0	0.0457767	0.0949372	0	0	0.0403535	0.0155575	0.0604759	0.102446	0.10694	0.00426197	0.0223883	0.0247604	0	0	0
GSE57495_GSM1383800	0.0220596	0	0	0.016577	0	0.11998	0.000772162	0.00702636	0.0435981	0	0	0.0376342	0.0314466	0.131206	0.000711841	0.175777	0.232047	0.112911	0.0420065	0	0.0129549	0.0132921
GSE57495_GSM1383801	0.0141617	0	0.0101478	0.0999063	0	0.167935	0	0.0230064	0.0654934	0	0	0.029885	0.00177802	0.252323	0.0213205	0.135978	0.0994654	0	0.0442635	0	0	0.0343365
GSE57495_GSM1383802	0.18453	0	0	0.157161	0	0.2677	0.0145055	0	0.0117001	0	0	0	0.00858492	0.0945429	0.0150567	0.18826	0.0214854	0.00632199	0.0146137	0	0	0.0155379
GSE57495_GSM1383804	0.0458295	0	0.0204564	0.127057	0	0.252697	0	0.0379199	0	0	0.0696887	0.0193129	0.036101	0.0494071	0.0252422	0.178172	0.0131446	0.115289	0	0.00614269	0.00353969	0
GSE57495_GSM1383805	0.0737686	0	0.00911056	0.0169714	0	0.120799	0	0	0.0408381	0	0.0145096	0.00913148	0.000521956	0.308364	0.15702	0.166951	0	0	0.0680052	0	0	0.0140095
GSE57495_GSM1383807	0.0232451	0.00873793	0	0.0341393	0	0.162286	0	0.00228638	0.0261709	0.00486742	0	0.0242434	0.105989	0.197539	0.0537892	0.200357	0.0196402	0.0338605	0.0734196	0	0	0.0294297
GSE57495_GSM1383808	0.0174759	0	0.00761978	0.107278	0	0.143713	0.0072132	0.0191531	0.0080733	0	0.0191912	0.0234992	0	0.269725	0.0684904	0.24693	0.0422713	0	0.0193667	0	0	0
GSE57495_GSM1383809	0.00740038	0.0149761	0.00476006	0.034653	0	0.185689	0	0.0448952	0.0285273	0	0	0.0466547	0.00354618	0.124659	0.0658236	0.20484	0.0626389	0.100461	0.0424888	0	0	0.0279868
GSE57495_GSM1383810	0.0293592	0	0	0.0184398	0	0.155764	0	0.00111659	0.0091388	0	0	0.0205955	0.168512	0.122367	0.0166299	0.302458	0.007511	0.0224219	0.084589	0	0.0410973	0
GSE57495_GSM1383811	0.0931293	0	0.0028191	0.101212	0	0.167818	0	0.0342897	0	0.0496301	0	0	0.0968916	0	0.0698227	0.222524	0.0343027	0.0489082	0.0604566	0	0.0136996	0.00449637
GSE57495_GSM1383812	0.274987	0	0.0332822	0.0893702	0	0.178259	0	0.0193121	0.0104541	0.0169793	0	0.00288345	0	0.16401	0.0201784	0.15878	0	0.00625937	0.0239041	0	0	0.0013403
GSE57495_GSM1383813	0.0145744	0.00732541	0	0.0498144	0	0.278294	0	0	0.0325796	0	0.00423444	0.00706465	0	0.191601	0	0.18486	0.00550758	0.15933	0.0575706	0	0	0.00724381
GSE57495_GSM1383815	0.0702817	0	0	0.0661924	0	0.209052	0	0	0.0161144	0.006513	0	0.00996906	0.126865	0	0.0576091	0.29982	0	0.00648608	0.125981	0	0.00130113	0.00381476
GSE57495_GSM1383816	0.0742237	0	0	0.310567	0	0.224096	0	0	0	0	0	0.0357882	0.0063923	0	0.119411	0.134616	0.0288911	0.0169526	0.0490624	0	0	0
GSE57495_GSM1383817	0.0128371	0.0193126	0.0264726	0.174559	0	0.245556	0	0	0.00552787	0	0	0.0811001	0.00518337	0.0431292	0.0627554	0.141039	0.0229423	0.0269021	0.0859457	0	0.0452645	0.00147366
GSE57495_GSM1383818	0.028248	0.0177323	0	0.00557483	0	0.194573	0	0.0327494	0.00220147	0.0445942	0	0	0	0.219754	0.0131109	0.197798	0	0.0414737	0	0.159025	0.0373795	0.00578519
GSE57495_GSM1383819	0.309173	0	0	0.0481129	0	0.268041	0.00377732	0	0.010595	0	0.0404223	0	0.0272289	0.0460463	0.0605875	0.135146	0.00434143	0	0.0465283	0	0	0
GSE57495_GSM1383820	0.00874003	0	0.00236362	0	0	0.127701	0	0.0408466	0.0351122	0	0.0299878	0	0.0209799	0.0766409	0.240125	0.294356	0.0312353	0.0183698	0.0680102	0	0.00447962	0.001052
GSE57495_GSM1383821	0.0309851	0	0.0054727	0.193482	0	0.346655	0	0.0247576	0	0	0.00520467	0	0.0413178	0	0.0981804	0.190155	0.0116725	0	0.0521171	0	0	0
GSE57495_GSM1383822	0.0115074	0	0	0.178285	0	0.0361732	0.214353	0.0392368	0	0.027928	0	0.200081	0	0.067818	0.0670759	0.0535051	0.0087063	0.00371715	0.0821524	0	0.00946017	0
GSE57495_GSM1383823	0.0675682	0	0.00199534	0.033834	0	0.225759	0	0.00120781	0.00998166	0.00558622	0	0	0	0.171135	0.0632208	0.184423	0.0629243	0	0	0.0158648	0.0487952	0.107705
GSE57495_GSM1383824	0.0070844	0.0103276	0.196039	0.192916	0	0.282323	0	0.0460549	0.0528665	0	0.047008	0	0.00644016	0.000213458	0.0532432	0.0510768	0.0335693	0	0	0.0208376	0	0
GSE57495_GSM1383825	0.0364531	0	0.00619161	0.26015	0	0.133558	0.0303656	0.0684232	0	0.00729113	0.00570872	0	0	0.0504852	0.113463	0.13294	0.133298	0	0.021672	0	0	0
GSE57495_GSM1383826	0.164327	0	0	0.122149	0	0.207815	0.0074315	0.0236134	0.0866625	0	0	0.0335049	0.0149846	0.0367833	0.0313965	0.164202	0.0125142	0.0397344	0.0339713	0	0	0.0209107
GSE57495_GSM1383827	0.0196719	0	0	0.0782537	0	0.0584309	0	0	0.0144814	0	0.00956679	0.0352853	0.051836	0.286991	0.0638154	0.0648307	0.0139831	0	0.0197529	0	0.0166407	0.26646
GSE57495_GSM1383828	0.0752597	0	0.00295429	0.0674505	0	0.146988	0	0	0.0200845	0	0.0819528	0	0.0698384	0.179521	0	0.0747628	0.00120668	0	0	0.068258	0.0170839	0.194639
GSE57495_GSM1383829	0.0280668	0	0.00827216	0.0560378	0	0.0780168	0	0.0223656	0.0607329	0	0.028154	0.0286623	0	0.40638	0.073425	0.130499	0	0.0509956	0.00562765	0	0	0.0227638
GSE57495_GSM1383830	0.0208357	0	0.00458562	0.0101742	0	0.226975	0	0.0116367	0.0183969	0	0.00387681	0.0230327	0.112348	0.0707526	0.0620931	0.350774	0	0.0136527	0.0675626	0	0.00330341	0
GSE57495_GSM1383831	0.0552691	0	0	0.139415	0	0.206244	0.0346658	0	0.0441598	0	0.00262692	0.0156738	0.0564093	0	0.087292	0.218174	0.0586352	0	0.0814351	0	0	0
GSE57495_GSM1383832	0.123155	0	0	0.141087	0	0.223469	0	0.0110232	0.0336387	0	0	0.0215451	0.0113691	0.097564	0.0428498	0.179639	0.0283197	0.0149313	0.0714097	0	0	0
GSE57495_GSM1383833	0.0798412	0	0.00394741	0.101931	0	0.178782	0	0.02644	0.0261988	0.0424341	0	0	0.15934	0	0.111517	0.198287	0.00136954	0	0.0699119	0	0	0
GSE57495_GSM1383834	0.079807	0	0	0.0842164	0	0.166275	0	0	0.00121792	0.00781865	0	0.0525023	0.0148367	0.0458423	0.00783057	0.461977	0.0200761	0.0133905	0.0269059	0.0117579	0.00451207	0.00103363
GSE57495_GSM1383835	0.0183644	0	0	0.178076	0	0.202543	0	0	0	0.0206796	0	0.0461344	0.0733122	0.0358945	0.0595711	0.273423	0.0490365	0	0.0374842	0	0	0.00548105
GSE57495_GSM1383836	0.0752815	0	0	0.0866602	0	0.304724	0	0	0	0	0	0.00769874	0.0186893	0.0501414	0.0251629	0.283675	0.025623	0.0326516	0.0480257	0	0.0416673	0
GSE57495_GSM1383837	0.00579184	0.00806874	0.0261038	0.101781	0	0.165084	0	0.0217152	0.00544724	0	0	0.0635738	0.0392903	0.060392	0.0156619	0.219042	0.114811	0	0.130158	0	0	0.0230797
GSE57495_GSM1383838	0.0529987	0	0	0.150787	0	0.217287	0	0	0.0355192	0	0.0101654	0.000357575	0.0234235	0.164014	0.0830501	0.181102	0.0410571	0	0.0111448	0	0	0.029094
GSE57495_GSM1383839	0.0129022	0	0.000848624	0.00756803	0	0.335995	0	0.013098	0.00452333	0	0.0246068	0.00886309	0	0.150001	0.0656055	0.259788	0.00461604	0	0.0608865	0	0.0346384	0.0160593
GSE57495_GSM1383840	0.0592336	0	0	0	0	0.264446	0.00231716	0.0117796	0.0351029	0	0	0.0143409	0.00726777	0.159179	0.164819	0.196981	0	0	0.0587028	0	0.0204822	0.00534828

## Sheet: S3
Table S3 ESTIMATE algorithm results
ID	StromalScore	ImmuneScore	ESTIMATEScore
TCGA_TCGA-XN-A8T3	1042.89	1134.14	2177.03
TCGA_TCGA-HZ-7918	1720.24	2651.37	4371.6
TCGA_TCGA-IB-7887	1065.9	1140.86	2206.77
TCGA_TCGA-3A-A9IN	618.283	289.458	907.742
TCGA_TCGA-F2-7276	1646.4	2108.57	3754.98
TCGA_TCGA-HV-A5A5	1035.05	1571.59	2606.64
TCGA_TCGA-IB-7893	2162.88	1214.45	3377.34
TCGA_TCGA-2L-AAQE	321.711	895.71	1217.42
TCGA_TCGA-HZ-8003	1699.05	2450.39	4149.44
TCGA_TCGA-YH-A8SY	1482.78	1051.1	2533.89
TCGA_TCGA-M8-A5N4	1061.65	1579.33	2640.99
TCGA_TCGA-2J-AABT	1386.47	1784.25	3170.72
TCGA_TCGA-IB-AAUU	608.003	1399.82	2007.82
TCGA_TCGA-IB-A5ST	1719.94	2662.97	4382.91
TCGA_TCGA-3A-A9IU	605.923	714.762	1320.68
TCGA_TCGA-2J-AAB1	673.334	1422.22	2095.55
TCGA_TCGA-IB-A6UG	-11.42	961.167	949.747
TCGA_TCGA-3A-A9J0	930.233	983.968	1914.2
TCGA_TCGA-IB-AAUQ	1114.34	890.515	2004.86
TCGA_TCGA-Q3-AA2A	376.067	1189.5	1565.57
TCGA_TCGA-FB-AAQ2	-208.081	310.956	102.875
TCGA_TCGA-2L-AAQM	-389.661	87.5986	-302.062
TCGA_TCGA-IB-7649	1562.68	2201.06	3763.74
TCGA_TCGA-F2-A8YN	699.884	957.523	1657.41
TCGA_TCGA-HZ-A49I	918.024	1896.97	2814.99
TCGA_TCGA-HV-A5A4	917.258	1089.41	2006.66
TCGA_TCGA-HZ-8636	1522.82	1593.27	3116.09
TCGA_TCGA-FB-A4P5	1625.7	2689.16	4314.87
TCGA_TCGA-2L-AAQA	190.71	493.399	684.108
TCGA_TCGA-HZ-A4BH	1278.06	1817.44	3095.5
TCGA_TCGA-2J-AABR	1221.51	2167.23	3388.74
TCGA_TCGA-IB-A5SP	-305.073	839.117	534.044
TCGA_TCGA-IB-AAUN	573.185	873.821	1447.01
TCGA_TCGA-HZ-A49G	1531.05	2116.93	3647.98
TCGA_TCGA-S4-A8RP	1016.12	1276.85	2292.97
TCGA_TCGA-HZ-A49H	1503.55	2251.34	3754.9
TCGA_TCGA-S4-A8RM	-47.5056	933.671	886.166
TCGA_TCGA-IB-AAUP	1705.18	3030.18	4735.36
TCGA_TCGA-3A-A9IL	115.971	162.597	278.567
TCGA_TCGA-IB-7652	1372.22	1736.53	3108.75
TCGA_TCGA-HV-AA8X	-182.05	320.517	138.467
TCGA_TCGA-HZ-A77Q	2107.13	2316.76	4423.9
TCGA_TCGA-FB-A545	113.908	-158.594	-44.686
TCGA_TCGA-LB-A9Q5	1107.83	1777.35	2885.18
TCGA_TCGA-HZ-A8P0	819.504	923.77	1743.27
TCGA_TCGA-S4-A8RO	360.982	1024.79	1385.77
TCGA_TCGA-3A-A9IC	1315.29	1120.91	2436.2
TCGA_TCGA-HZ-8519	1412.18	1628.65	3040.82
TCGA_TCGA-3A-A9IR	-1148.97	-542.954	-1691.92
TCGA_TCGA-HV-AA8V	1599.04	1236.54	2835.58
TCGA_TCGA-Q3-A5QY	1569	3408.57	4977.56
TCGA_TCGA-HZ-A9TJ	-87.0459	471.917	384.872
TCGA_TCGA-FB-AAPS	2187.01	2278.79	4465.81
TCGA_TCGA-LB-A7SX	-364.289	585.585	221.296
TCGA_TCGA-IB-AAUS	2356.86	2821.46	5178.31
TCGA_TCGA-HV-A7OP	-1301.79	422.811	-878.975
TCGA_TCGA-FB-AAQ1	378.61	1188.33	1566.94
TCGA_TCGA-IB-7888	2001.08	2507.08	4508.17
TCGA_TCGA-F2-7273	1931.31	2159.45	4090.76
TCGA_TCGA-2L-AAQI	353.311	690.714	1044.03
TCGA_TCGA-XD-AAUG	1944.54	1263.95	3208.49
TCGA_TCGA-3A-A9IS	-1490.74	-1023.78	-2514.51
TCGA_TCGA-IB-AAUT	1418.48	2225.83	3644.31
TCGA_TCGA-Z5-AAPL	978.913	3455.42	4434.34
TCGA_TCGA-HZ-A4BK	733.332	1768.73	2502.06
TCGA_TCGA-US-A776	-1005.71	-191.75	-1197.46
TCGA_TCGA-IB-7889	1093.52	2161.02	3254.54
TCGA_TCGA-IB-AAUR	1767.45	3220.39	4987.84
TCGA_TCGA-IB-A7M4	209.336	1297.94	1507.28
TCGA_TCGA-3A-A9IH	370.227	741.695	1111.92
TCGA_TCGA-HV-A5A6	474.015	462.447	936.462
TCGA_TCGA-HZ-8001	1930.42	2308.75	4239.17
TCGA_TCGA-3E-AAAZ	768.088	559.688	1327.78
TCGA_TCGA-IB-7885	1612.69	1905.37	3518.06
TCGA_TCGA-IB-7651	1439.23	1830.41	3269.64
TCGA_TCGA-US-A779	-667.175	239.195	-427.981
TCGA_TCGA-HZ-7925	2067.19	1367.54	3434.73
TCGA_TCGA-IB-7886	1387.43	1440.46	2827.89
TCGA_TCGA-IB-8127	1205.14	1539.95	2745.1
TCGA_TCGA-HZ-8637	1669.28	3210.18	4879.46
TCGA_TCGA-HZ-A77P	1408.98	1387.88	2796.86
TCGA_TCGA-IB-7646	1644.2	1682.59	3326.79
TCGA_TCGA-HV-A5A3	-15.8736	614.028	598.155
TCGA_TCGA-3A-A9I5	276.718	733.102	1009.82
TCGA_TCGA-HZ-8005	1335.72	1317.09	2652.81
TCGA_TCGA-2J-AAB9	1103.53	1353.1	2456.63
TCGA_TCGA-XN-A8T5	1529.2	2339.49	3868.7
TCGA_TCGA-HZ-8638	195.897	1050.96	1246.85
TCGA_TCGA-L1-A7W4	272.895	42.3637	315.259
TCGA_TCGA-3A-A9IJ	-716.368	-656.853	-1373.22
TCGA_TCGA-IB-AAUV	2304.65	2395.97	4700.62
TCGA_TCGA-FB-AAQ3	840.26	1376.21	2216.47
TCGA_TCGA-RL-AAAS	1557.62	2298.82	3856.44
TCGA_TCGA-IB-7890	1887.99	1155.49	3043.48
TCGA_TCGA-XD-AAUI	841.11	1508.28	2349.39
TCGA_TCGA-2J-AABK	-380.916	747.051	366.136
TCGA_TCGA-IB-A5SS	1518.2	1360.9	2879.1
TCGA_TCGA-FB-AAPZ	808.638	1611.76	2420.39
TCGA_TCGA-2J-AABI	478.349	1511.4	1989.75
TCGA_TCGA-HZ-7920	1566.4	2074.74	3641.14
TCGA_TCGA-FB-AAPU	-594.617	284.787	-309.83
TCGA_TCGA-HZ-7922	1600.23	1330.41	2930.64
TCGA_TCGA-IB-A6UF	117.362	573.407	690.769
TCGA_TCGA-OE-A75W	752.691	1564.64	2317.33
TCGA_TCGA-3A-A9IZ	167.972	581.439	749.411
TCGA_TCGA-2J-AABU	788.803	1034.17	1822.97
TCGA_TCGA-HZ-7924	251.826	1175.16	1426.99
TCGA_TCGA-HZ-7289	-980.252	-155.663	-1135.92
TCGA_TCGA-HZ-7926	505.955	1261.25	1767.2
TCGA_TCGA-RB-AA9M	601.242	802.143	1403.38
TCGA_TCGA-3A-A9IO	-880.861	-490.86	-1371.72
TCGA_TCGA-2J-AABH	411.088	966.276	1377.36
TCGA_TCGA-IB-7645	2146.39	2536.18	4682.57
TCGA_TCGA-2J-AABA	1035.83	963.171	1999
TCGA_TCGA-FB-AAQ0	-175.731	141.786	-33.9444
TCGA_TCGA-FB-AAPQ	234.69	671.994	906.683
TCGA_TCGA-2L-AAQL	837.157	1457.14	2294.29
TCGA_TCGA-HZ-7923	2132.66	2680.57	4813.23
TCGA_TCGA-H6-A45N	1397.17	1756.27	3153.44
TCGA_TCGA-F2-A44H	1693.48	1745.01	3438.48
TCGA_TCGA-IB-7644	820.075	948.717	1768.79
TCGA_TCGA-3A-A9IB	1363.75	1288.82	2652.56
TCGA_TCGA-IB-AAUW	1053.34	1552.84	2606.18
TCGA_TCGA-HZ-7919	943.098	1255.82	2198.92
TCGA_TCGA-IB-AAUM	612.221	1405.59	2017.81
TCGA_TCGA-HZ-A8P1	-92.287	363.347	271.06
TCGA_TCGA-2J-AABV	102.428	1095.22	1197.65
TCGA_TCGA-F2-6880	-460.94	65.5141	-395.426
TCGA_TCGA-2L-AAQJ	539.227	1277.68	1816.91
TCGA_TCGA-HZ-8317	1216.16	889.089	2105.25
TCGA_TCGA-3A-A9I9	645.426	1359.42	2004.85
TCGA_TCGA-FB-AAPY	1005.42	2136.94	3142.36
TCGA_TCGA-H6-8124	461.44	270.66	732.1
TCGA_TCGA-3E-AAAY	1360.29	2048.47	3408.76
TCGA_TCGA-LB-A8F3	141.274	544.82	686.094
TCGA_TCGA-US-A77E	792.095	667.711	1459.81
TCGA_TCGA-YY-A8LH	-818.155	428.58	-389.576
TCGA_TCGA-IB-7654	1257.25	790.528	2047.78
TCGA_TCGA-FB-A78T	198.901	1328.54	1527.44
TCGA_TCGA-2J-AAB8	1265.76	1014.78	2280.54
TCGA_TCGA-FB-A4P6	923.522	1535.96	2459.48
TCGA_TCGA-FB-A7DR	1414.62	1272.14	2686.76
TCGA_TCGA-H8-A6C1	633.678	1423.89	2057.57
TCGA_TCGA-2J-AABE	1031.25	1271.89	2303.14
TCGA_TCGA-RB-A7B8	1391.79	1636.28	3028.07
TCGA_TCGA-2J-AABO	841.578	798.454	1640.03
TCGA_TCGA-FB-A5VM	966.763	1847.14	2813.9
TCGA_TCGA-HZ-8315	1512.88	1716.44	3229.33
TCGA_TCGA-3A-A9IX	1517.87	2261.7	3779.58
TCGA_TCGA-XD-AAUH	1444.57	2213.35	3657.92
TCGA_TCGA-HZ-A77O	373.389	974.112	1347.5
TCGA_TCGA-IB-A5SO	1709.78	1912.99	3622.77
TCGA_TCGA-F2-6879	862.035	821.366	1683.4
TCGA_TCGA-2J-AAB4	514.497	1452.16	1966.66
TCGA_TCGA-US-A774	1475.6	1706.87	3182.48
TCGA_TCGA-IB-8126	1505.62	2291.94	3797.56
TCGA_TCGA-F2-A44G	836.088	1119.28	1955.37
TCGA_TCGA-IB-AAUO	220.361	1295.23	1515.59
TCGA_TCGA-2J-AAB6	970.636	944.345	1914.98
TCGA_TCGA-2J-AABF	1177.68	2072.3	3249.98
TCGA_TCGA-HZ-8002	1791.31	1879	3670.32
TCGA_TCGA-FB-AAQ6	-14.203	478.411	464.208
TCGA_TCGA-IB-7891	1769.82	2180.68	3950.5
TCGA_TCGA-YB-A89D	1697.58	1636.88	3334.46
TCGA_TCGA-IB-A5SQ	1615.48	1624.54	3240.02
TCGA_TCGA-2J-AABP	1837.19	2354.52	4191.71
TCGA_TCGA-US-A77G	-761.146	430.143	-331.003
TCGA_TCGA-IB-A7LX	-25.5083	374.118	348.609
TCGA_TCGA-US-A77J	1570.74	2864.81	4435.55
TCGA_TCGA-PZ-A5RE	1093.61	1669.26	2762.87
TCGA_TCGA-HV-A7OL	527.985	2139.52	2667.5
TCGA_TCGA-IB-7897	2014.7	2405.95	4420.65
TCGA_TCGA-3A-A9IV	264.412	-444.733	-180.321
TCGA_TCGA-3A-A9I7	1056.79	1551.05	2607.84
TCGA_TCGA-FB-AAPP	-1545.25	-489.369	-2034.62
TCGA_TCGA-F2-A7TX	681.878	1902.15	2584.03
TCGA_TCGA-XD-AAUL	1091.59	1375.81	2467.41
GSE57495_GSM1383778	725.969	745.736	1471.71
GSE57495_GSM1383779	949.713	1520.75	2470.47
GSE57495_GSM1383780	-875.314	-354.181	-1229.5
GSE57495_GSM1383781	1142.66	1649.69	2792.34
GSE57495_GSM1383782	1642.41	1289.39	2931.79
GSE57495_GSM1383783	1092.46	1096.8	2189.26
GSE57495_GSM1383784	-515.075	2301.06	1785.98
GSE57495_GSM1383785	942.692	1453.96	2396.65
GSE57495_GSM1383786	1673.9	2476.12	4150.02
GSE57495_GSM1383787	1437.47	1485.15	2922.62
GSE57495_GSM1383788	-228.007	-146.973	-374.979
GSE57495_GSM1383789	772.453	-223.624	548.829
GSE57495_GSM1383790	1059.75	677.48	1737.23
GSE57495_GSM1383791	1243.43	1767.57	3011
GSE57495_GSM1383792	1125.24	2078.81	3204.04
GSE57495_GSM1383793	676.507	515.249	1191.76
GSE57495_GSM1383794	432.897	1214.63	1647.52
GSE57495_GSM1383795	892.538	2226.57	3119.11
GSE57495_GSM1383796	302.779	-497.526	-194.747
GSE57495_GSM1383797	1421.59	1723.62	3145.21
GSE57495_GSM1383798	1502.72	1615.74	3118.45
GSE57495_GSM1383799	1190.02	2039.17	3229.19
GSE57495_GSM1383800	1080.04	1553.24	2633.28
GSE57495_GSM1383801	585.997	962.919	1548.92
GSE57495_GSM1383802	1779.34	2262.88	4042.22
GSE57495_GSM1383803	640.237	274.255	914.492
GSE57495_GSM1383804	972.398	658.671	1631.07
GSE57495_GSM1383805	389.593	563.614	953.207
GSE57495_GSM1383806	796.602	-171.534	625.068
GSE57495_GSM1383807	1784.96	1911.75	3696.71
GSE57495_GSM1383808	-3.39248	957.58	954.188
GSE57495_GSM1383809	859.057	1418.03	2277.09
GSE57495_GSM1383810	1062.6	1250.21	2312.82
GSE57495_GSM1383811	1631.16	1673.8	3304.96
GSE57495_GSM1383812	1632.72	2136.57	3769.29
GSE57495_GSM1383813	1611.79	1639.33	3251.12
GSE57495_GSM1383814	-722.548	-13.3063	-735.854
GSE57495_GSM1383815	1583.68	1286.87	2870.56
GSE57495_GSM1383816	916.147	2328.35	3244.5
GSE57495_GSM1383817	848.815	1369.43	2218.25
GSE57495_GSM1383818	1762.27	1117.79	2880.06
GSE57495_GSM1383819	1234.66	1616.82	2851.48
GSE57495_GSM1383820	1527.88	1220.76	2748.63
GSE57495_GSM1383821	999.507	1406.29	2405.79
GSE57495_GSM1383822	-741.672	-46.9349	-788.607
GSE57495_GSM1383823	970.71	1806.43	2777.14
GSE57495_GSM1383824	-972.659	304.937	-667.722
GSE57495_GSM1383825	1333.3	3054.81	4388.1
GSE57495_GSM1383826	1601.02	2920.69	4521.71
GSE57495_GSM1383827	-885.017	2611.88	1726.86
GSE57495_GSM1383828	-1460.17	1663.77	203.599
GSE57495_GSM1383829	967.046	1616.5	2583.55
GSE57495_GSM1383830	1314.61	1486.17	2800.79
GSE57495_GSM1383831	978.101	1416.96	2395.06
GSE57495_GSM1383832	974.968	1274.23	2249.2
GSE57495_GSM1383833	1695.07	1386.85	3081.92
GSE57495_GSM1383834	1628.04	1219.77	2847.81
GSE57495_GSM1383835	1134.43	1813.2	2947.64
GSE57495_GSM1383836	1446.27	1837.02	3283.29
GSE57495_GSM1383837	658.451	1208.95	1867.4
GSE57495_GSM1383838	1406.12	2300.96	3707.07
GSE57495_GSM1383839	1480.9	1400.25	2881.15
GSE57495_GSM1383840	1275.6	1201.43	2477.04

## Sheet: S4
Table S4 Differentially expressed genes among three ICI clusters
ICI cluster A vs B								ICI cluster A vs C								ICI cluster B vs C
ID	logFC	AveExpr	t	pvalue	p.adjust	B		ID	logFC	AveExpr	t	pvalue	p.adjust	B		ID	logFC	AveExpr	t	pvalue	p.adjust	B
CD3E	-1.72956	5.18428	-9.33279	2.93828e-17	3.86442e-13	28.5674		FCRLA	-1.93617	2.39289	-9.72542	2.29534e-18	4.04898e-14	30.9391		MMP9	-1.60311	6.74918	-7.41346	4.07709e-12	7.19199e-08	16.6554
CD3D	-1.68096	5.41605	-9.27076	4.38142e-17	3.86442e-13	28.1812		CD19	-1.93921	2.96806	-9.5759	6.08489e-18	4.95086e-14	30.0023		TMEM100	1.00038	3.6629	5.71956	4.14547e-08	0.000209471	8.2038
GIMAP7	-1.54688	5.80149	-9.09477	1.35414e-16	7.96236e-13	27.0905		CD79B	-1.97584	4.22187	-9.52593	8.41983e-18	4.95086e-14	29.6902		VIP	1.71	3.55226	5.69235	4.74992e-08	0.000209471	8.07951
ZNF831	-1.0452	2.0414	-8.9775	2.8597e-16	1.26113e-12	26.368		VPREB3	-2.30158	3.25331	-9.23228	5.61111e-17	2.4745e-13	27.8675		OGN	1.42663	4.8205	4.98482	1.40302e-06	0.00229393	4.99623
GPR18	-1.27312	2.61569	-8.9218	4.07348e-16	1.43712e-12	26.0261		TCL1A	-2.29613	2.44696	-9.10118	1.29981e-16	4.58572e-13	27.0603		CASP14	-1.05571	1.45362	-4.72526	4.49097e-06	0.00264069	3.9416
SIT1	-1.59793	3.6212	-8.88694	5.08083e-16	1.49376e-12	25.8126		GPR18	-1.17239	2.61569	-9.0574	1.71908e-16	5.0541e-13	26.7917		THBS4	1.14166	7.28744	4.51741	1.10401e-05	0.00381858	3.12866
ITM2A	-1.64056	5.64595	-8.80678	8.43437e-16	1.98965e-12	25.3228		MS4A1	-2.57902	3.02525	-8.92447	4.00498e-16	8.83097e-13	25.979		GJB6	-1.21799	2.89027	-4.34717	2.25623e-05	0.00555412	2.48448
SLAMF1	-1.22388	2.89122	-8.78211	9.85472e-16	1.98965e-12	25.1724		IGHD	-2.38188	3.43961	-8.69822	1.67087e-15	3.25348e-12	24.6066		CXCL9	1.12761	5.41035	4.14787	5.07729e-05	0.00748675	1.75576
MADCAM1	-2.02761	3.15739	-8.77741	1.01513e-15	1.98965e-12	25.1438		FCRL2	-1.259	1.76833	-8.66775	2.02297e-15	3.25348e-12	24.4229		ADH1B	1.17014	4.49107	4.14401	5.15629e-05	0.00748675	1.74191
CD8A	-1.59546	4.85696	-8.72701	1.39429e-15	2.45953e-12	24.8371		FAM129C	-1.45454	2.13223	-8.66729	2.02882e-15	3.25348e-12	24.4201		REG3A	2.98738	7.20083	4.13876	5.26544e-05	0.00751019	1.72313
CD79B	-1.98042	4.22187	-8.66096	2.11095e-15	3.20654e-12	24.4364		FCRL3	-1.35448	2.54138	-8.61999	2.72862e-15	3.83989e-12	24.1354		PNLIP	3.45422	7.02203	4.12874	5.48019e-05	0.00757483	1.68729
CD3G	-1.29804	3.06829	-8.65573	2.18132e-15	3.20654e-12	24.4047		FCER2	-1.83073	2.33744	-8.61417	2.82985e-15	3.83989e-12	24.1004		CLPS	3.16979	6.80826	4.02549	8.23824e-05	0.00949821	1.32224
GZMK	-1.82027	4.54831	-8.6117	2.87386e-15	3.78833e-12	24.1383		CXCL13	-2.74354	4.29602	-8.37794	1.23014e-14	1.54998e-11	22.6889		CPB1	2.92069	6.76325	3.97819	9.90425e-05	0.0102512	1.15758
KLRB1	-1.58536	4.39036	-8.58548	3.38583e-15	3.78833e-12	23.98		P2RX5	-1.41843	2.9766	-8.36153	1.36148e-14	1.6011e-11	22.5914		PLA2G1B	2.95026	6.60701	3.97707	9.94726e-05	0.0102512	1.1537
CD2	-1.45919	5.11775	-8.57094	3.70769e-15	3.78833e-12	23.8922		SIT1	-1.35488	3.6212	-8.30694	1.90676e-14	2.1022e-11	22.2679		COL14A1	1.00353	6.72204	3.95284	0.000109244	0.0104731	1.07
CD96	-1.36827	3.13952	-8.57055	3.71684e-15	3.78833e-12	23.8899		CNR2	-1.01167	1.37351	-8.26747	2.4311e-14	2.52262e-11	22.0346		REG3G	2.36298	4.93463	3.93801	0.000115666	0.0107939	1.01899
SLA2	-1.14334	3.7952	-8.56272	3.90282e-15	3.78833e-12	23.8427		IL24	-1.39237	3.25697	-8.25455	2.63194e-14	2.5793e-11	21.9584		CPA2	2.81382	6.397	3.89512	0.000136327	0.011185	0.872329
CXCR6	-1.33008	3.55431	-8.55116	4.1949e-15	3.78833e-12	23.773		DNASE1L3	-1.17738	2.29451	-8.11251	6.27826e-14	5.27374e-11	21.1236		C7	1.21721	7.72543	3.89497	0.000136404	0.011185	0.871826
CD5	-1.45979	3.90851	-8.54737	4.29516e-15	3.78833e-12	23.7502		FCRL1	-1.54404	1.72476	-8.08173	7.57273e-14	5.75386e-11	20.9436		CTRC	2.62858	5.71645	3.89109	0.000138438	0.0112537	0.858625
ITK	-1.45574	3.26611	-8.46424	7.20561e-15	6.05272e-12	23.2504		CLEC17A	-1.32239	2.07629	-8.07628	7.82838e-14	5.75386e-11	20.9117		CHRDL1	1.00044	4.21285	3.84854	0.000162715	0.0123189	0.714601
DNASE1L3	-1.34569	2.29451	-8.41083	1.00357e-14	7.73115e-12	22.9304		CD79A	-2.27175	4.8645	-8.04995	9.18716e-14	6.48246e-11	20.7581		CELA3A	2.87152	7.561	3.78063	0.000209992	0.0137195	0.487549
IL24	-1.55768	3.25697	-8.3767	1.23963e-14	9.11131e-12	22.7264		IKZF3	-1.17232	3.00064	-8.03597	1.00014e-13	6.7856e-11	20.6766		SYCN	2.64975	5.18136	3.75634	0.000229865	0.0141451	0.407153
CCL19	-2.84374	6.72122	-8.1931	3.83699e-14	2.70738e-11	21.6353		BTLA	-1.01844	2.07304	-7.99098	1.31375e-13	8.58317e-11	20.4147		PNLIPRP2	2.50666	5.21895	3.75103	0.00023444	0.0142114	0.389639
SELP	-1.80208	4.43694	-8.17789	4.21119e-14	2.85713e-11	21.5455		MAP4K1	-1.12435	4.03296	-7.91507	2.07815e-13	1.30924e-10	19.9745		CELA2B	2.20039	4.67369	3.71738	0.000265498	0.0150108	0.279128
TSPAN33	-1.20221	4.9841	-8.16238	4.63032e-14	3.02515e-11	21.4539		CR2	-2.68599	3.39554	-7.76141	5.22475e-13	3.17809e-10	19.0898		PNLIPRP1	2.13627	4.27482	3.70657	0.000276269	0.0151777	0.243822
MAP4K1	-1.26542	4.03296	-8.08052	7.62874e-14	4.68985e-11	20.9718		STAP1	-1.32331	2.55282	-7.73382	6.15949e-13	3.50495e-10	18.9319		UPK3B	-1.03877	3.0419	-3.68191	0.000302412	0.0157361	0.163593
BTLA	-1.13508	2.07304	-8.07878	7.71007e-14	4.68985e-11	20.9616		POU2AF1	-1.61873	4.3221	-7.69708	7.66581e-13	4.09772e-10	18.722		CTRB2	2.77498	6.72311	3.6783	0.000306439	0.015792	0.15186
IRF4	-1.36896	2.99942	-8.03414	1.0113e-13	5.94642e-11	20.6997		CCR7	-1.63495	4.21964	-7.66616	9.21164e-13	4.77922e-10	18.5457		CELA2A	2.57824	5.66164	3.64404	0.00034716	0.016641	0.0412507
FCRL3	-1.39046	2.54138	-8.0269	1.05671e-13	6.01304e-11	20.6573		CD27	-1.34123	4.32186	-7.63065	1.13701e-12	5.73055e-10	18.3438		CPA1	2.84525	7.0102	3.6374	0.000355624	0.0168635	0.0199071
FLT3	-1.39653	2.56234	-8.0073	1.19009e-13	6.56038e-11	20.5426		TLR10	-1.05482	1.94381	-7.57995	1.53441e-12	7.51861e-10	18.0562		C6	1.21229	5.12176	3.5603	0.000469196	0.0193832	-0.225346
CD27	-1.54584	4.32186	-7.97765	1.42415e-13	7.61271e-11	20.3693		PLA2G2D	-1.36486	2.50213	-7.54475	1.88834e-12	9.0028e-10	17.8572		REG1B	2.5382	6.12473	3.55008	0.000486606	0.0196306	-0.257545
RAB39B	-1.09045	2.19362	-7.96325	1.55373e-13	7.92304e-11	20.2853		TBC1D10C	-1.13304	3.8941	-7.36407	5.43634e-12	2.4589e-09	16.8433		GP2	2.36065	6.04225	3.51214	0.000556618	0.0208796	-0.376257
CD247	-1.2348	3.98936	-7.96131	1.57203e-13	7.92304e-11	20.274		CD3D	-1.20757	5.41605	-7.34204	6.17915e-12	2.71648e-09	16.7205		A2ML1	-1.00006	2.23735	-3.49667	0.000587794	0.0216014	-0.424343
IGHD	-2.40123	3.43961	-7.95422	1.64079e-13	8.03989e-11	20.2327		ACAP1	-1.0192	3.97146	-7.33832	6.31382e-12	2.71648e-09	16.6998		CEL	2.46703	6.16382	3.47893	0.000625567	0.0224035	-0.479268
CCR7	-1.86873	4.21964	-7.94827	1.70086e-13	8.10898e-11	20.198		CD8B	-1.00263	3.27066	-7.30945	7.46489e-12	3.13525e-09	16.5393		REG1A	2.23307	9.28248	3.44472	0.000704934	0.0240059	-0.584517
CYFIP2	-1.03123	4.54308	-7.93721	1.81837e-13	8.44107e-11	20.1335		ZAP70	-1.04635	3.4649	-7.27849	8.92971e-12	3.66326e-09	16.3676		GSTA2	1.18698	3.2264	3.39528	0.000836388	0.0259149	-0.734971
SLC16A3	1.38597	6.38778	7.93251	1.87064e-13	8.46105e-11	20.1061		IRF4	-1.11902	2.99942	-7.23992	1.11566e-11	4.47276e-09	16.1542		BEX1	1.00473	5.42782	3.35236	0.000968755	0.027474	-0.864038
IKZF1	-1.31569	4.03267	-7.9281	1.92103e-13	8.47176e-11	20.0805		IGHM	-1.82263	7.79438	-7.19334	1.45857e-11	5.59329e-09	15.8974		SERPINI2	1.45702	2.96933	3.33658	0.00102217	0.0285303	-0.911142
GFRA1	-1.41483	3.17064	-7.88948	2.42439e-13	9.9649e-11	19.8559		TNFRSF13C	-1.33939	2.62596	-7.14774	1.89453e-11	6.82032e-09	15.6468		UGT2A3	1.03215	4.05618	3.27115	0.00127425	0.0310038	-1.10429
BCL2	-1.03607	3.73556	-7.88942	2.4253e-13	9.9649e-11	19.8556		BLK	-1.26605	2.14161	-7.11748	2.25248e-11	7.94674e-09	15.4811		AQP8	1.42363	3.44274	3.23977	0.00141468	0.033049	-1.19573
THEMIS	-1.15048	2.31784	-7.88534	2.48558e-13	9.9649e-11	19.8319		HLA-DOB	-1.17282	3.85184	-7.11072	2.34113e-11	7.99696e-09	15.4441		SPINK1	1.13143	9.86568	3.1525	0.00188441	0.0382081	-1.44591
CD8B	-1.18038	3.27066	-7.80588	4.00466e-13	1.56983e-10	19.3717		FCRL5	-1.02459	2.1566	-7.10951	2.35738e-11	7.99696e-09	15.4374		SST	1.40666	8.46063	3.11385	0.00213546	0.0410878	-1.55475
CD6	-1.14713	3.91239	-7.78317	4.58748e-13	1.7592e-10	19.2406		CD3E	-1.17029	5.18428	-6.96174	5.454e-11	1.74925e-08	14.6342		KLK1	1.29125	5.9299	3.10007	0.00223223	0.0419346	-1.59328
GIMAP1	-1.06387	3.57004	-7.77849	4.71772e-13	1.77065e-10	19.2136		GZMK	-1.33089	4.54831	-6.94131	6.11994e-11	1.92778e-08	14.5239		KRT16	-1.0574	6.38066	-3.08718	0.0023264	0.0427487	-1.62917
IKZF3	-1.24251	3.00064	-7.72579	6.46159e-13	2.37463e-10	18.9102		PAX5	-1.07729	1.98346	-6.76275	1.6616e-10	4.82197e-08	13.568		PRSS1	2.17722	7.54093	3.07869	0.0023904	0.0432291	-1.65274
GVINP1	-1.0979	2.60538	-7.71604	6.84793e-13	2.46526e-10	18.8541		CD22	-1.31837	3.16897	-6.76212	1.66746e-10	4.82197e-08	13.5646		CFTR	1.06264	6.58674	3.04712	0.0026429	0.0451345	-1.73985
FCRLA	-1.68642	2.39289	-7.68394	8.28866e-13	2.92424e-10	18.67		MADCAM1	-1.41142	3.15739	-6.73575	1.93006e-10	5.31972e-08	13.4247		GC	1.17321	5.94712	3.03981	0.00270475	0.0453557	-1.75991
PYHIN1	-1.03503	2.57014	-7.66902	9.0567e-13	3.13255e-10	18.5845		PPP1R16B	-1.0263	3.8052	-6.69698	2.39155e-10	6.39195e-08	13.2197		PRSS2	1.95421	9.64415	3.03904	0.00271133	0.0454206	-1.76201
EOMES	-1.1431	3.02912	-7.63534	1.10584e-12	3.68058e-10	18.3919		IGHV5-78	-1.18841	2.85341	-6.64847	3.12437e-10	7.98752e-08	12.9641
SLAMF6	-1.40834	4.04119	-7.62731	1.15975e-12	3.71963e-10	18.346		CD5	-1.02933	3.90851	-6.64424	3.19791e-10	8.05874e-08	12.9418
TFAP2A	1.33444	3.75108	7.61034	1.28221e-12	4.03896e-10	18.2492		CD8A	-1.09857	4.85696	-6.62447	3.56465e-10	8.73338e-08	12.838
SIRPG	-1.13853	3.26367	-7.60206	1.3466e-12	4.16739e-10	18.202		TNFRSF17	-1.3092	3.04355	-6.44934	9.24916e-10	2.09173e-07	11.9268
CXCL13	-2.73606	4.29602	-7.57887	1.54419e-12	4.69648e-10	18.0699		MZB1	-1.44817	4.62024	-6.36333	1.46913e-09	3.16042e-07	11.4849
GIMAP6	-1.18544	4.95021	-7.54039	1.93736e-12	5.69584e-10	17.8512		CD48	-1.11839	5.15906	-6.30274	2.03067e-09	4.09185e-07	11.1758
ZAP70	-1.19393	3.4649	-7.53347	2.01792e-12	5.83542e-10	17.812		CCL19	-1.98274	6.72122	-6.29754	2.08768e-09	4.09185e-07	11.1494
RBP5	-1.11061	4.65594	-7.52617	2.1065e-12	5.99333e-10	17.7706		SELL	-1.21867	5.32821	-6.04383	7.92584e-09	1.33154e-06	9.87694
STAT4	-1.01225	3.86854	-7.52267	2.15026e-12	6.02073e-10	17.7507		SELP	-1.11578	4.43694	-5.58201	8.21417e-08	1.05765e-05	7.65199
PPP1R16B	-1.26969	3.8052	-7.51547	2.24323e-12	6.13451e-10	17.7099		SPOCK2	-1.00233	4.92778	-5.55385	9.43586e-08	1.19747e-05	7.52031
SH2D1A	-1.33944	3.12607	-7.51417	2.26045e-12	6.13451e-10	17.7026		MARCO	1.51346	5.38471	5.54871	9.67752e-08	1.21937e-05	7.4963
CLEC10A	-1.47667	3.92033	-7.50796	2.34447e-12	6.26614e-10	17.6674		SCARA5	-1.3659	3.1757	-5.18623	5.52134e-07	5.62986e-05	5.8456
TLR10	-1.15017	1.94381	-7.49727	2.49627e-12	6.49715e-10	17.6069		IGHG1	-1.47411	8.93859	-4.93487	1.76108e-06	0.000158497	4.74972
CD48	-1.46649	5.15906	-7.49671	2.50457e-12	6.49715e-10	17.6037		PLA2G2A	-2.00433	5.56402	-4.84615	2.62659e-06	0.000222755	4.3728
P2RY8	-1.14534	3.9088	-7.49364	2.55012e-12	6.51945e-10	17.5863		IGFL2	1.1122	4.37446	4.80862	3.10573e-06	0.000253635	4.21495
ARHGAP15	-1.01206	3.97868	-7.48122	2.74282e-12	6.91191e-10	17.5161		IGHV3-48	-1.12731	3.57107	-4.78689	3.42062e-06	0.000278064	4.12401
P2RY10	-1.32753	2.52103	-7.46882	2.94953e-12	7.32812e-10	17.446		LTB	-1.03345	5.5755	-4.75374	3.96127e-06	0.000313349	3.98588
GPR171	-1.39489	3.03894	-7.46365	3.04018e-12	7.44844e-10	17.4169		SPIB	-1.0718	3.3894	-4.72693	4.45811e-06	0.000343411	3.8747
MMP9	1.71279	6.74918	7.45506	3.19712e-12	7.72564e-10	17.3684		PTGDS	-1.12167	7.65406	-4.68407	5.37959e-06	0.000398723	3.698
C16orf89	-1.63891	3.84322	-7.39949	4.42312e-12	1.00983e-09	17.0555		SDR16C5	1.05213	5.58841	4.62387	6.98978e-06	0.000497176	3.45195
MS4A1	-2.35666	3.02525	-7.39737	4.4781e-12	1.00983e-09	17.0436		CLIC3	1.13203	5.82964	4.57905	8.48117e-06	0.000579875	3.27036
CBLN1	-1.16594	2.05731	-7.39568	4.52247e-12	1.00983e-09	17.0341		CCL21	-1.39528	7.29954	-4.52657	1.06176e-05	0.000686061	3.05957
LAX1	-1.2225	2.6736	-7.39294	4.59533e-12	1.01327e-09	17.0187		IGLV6-57	-1.42817	5.72494	-4.43718	1.55008e-05	0.000920653	2.70498
PRKCQ	-1.02559	3.10459	-7.32095	6.98328e-12	1.48416e-09	16.6154		COL11A1	1.39489	6.44073	4.42451	1.6347e-05	0.000939289	2.65521
TCL1A	-2.03498	2.44696	-7.31667	7.15875e-12	1.50334e-09	16.5915		NGFR	-1.02007	5.1298	-4.41204	1.7224e-05	0.000970705	2.60629
ADH1B	-2.19364	4.49107	-7.31199	7.35557e-12	1.5265e-09	16.5654		MSLN	1.26538	7.74544	4.24321	3.45653e-05	0.00162163	1.95532
CD40LG	-1.10484	2.33116	-7.30821	7.51867e-12	1.5422e-09	16.5443		TRIM29	1.14348	6.61191	4.2148	3.87883e-05	0.00178184	1.84779
STAP1	-1.3411	2.55282	-7.10959	2.35629e-11	4.42181e-09	15.4441		COL17A1	1.39097	6.48092	4.20247	4.07708e-05	0.00185839	1.80131
PLA2G2D	-1.41696	2.50213	-7.10505	2.41819e-11	4.49019e-09	15.4191		IGHG2	-1.2848	9.31482	-4.12359	5.59381e-05	0.0023552	1.50668
CCL5	-1.21728	6.8118	-7.05337	3.24582e-11	5.9642e-09	15.1357		PI16	-1.02255	3.46956	-4.04691	7.57492e-05	0.00293843	1.22472
CCL21	-2.39485	7.29954	-7.04757	3.3545e-11	6.10035e-09	15.104		LTF	-1.34693	5.81616	-3.96363	0.000104783	0.00378763	0.923518
TRAT1	-1.18032	2.49089	-7.04246	3.45327e-11	6.21589e-09	15.0761		MUC17	1.37535	3.42211	3.92823	0.000120099	0.00421183	0.797043
CCDC69	-1.16469	5.2478	-7.03249	3.65451e-11	6.44656e-09	15.0216		FABP4	-1.23038	5.03799	-3.90676	0.000130398	0.00441463	0.720827
TIGIT	-1.05774	2.93857	-6.99087	4.62634e-11	8.08006e-09	14.7946		ADH1B	-1.0235	4.49107	-3.761	0.000225918	0.00665308	0.212785
CD1C	-1.46076	4.25565	-6.97367	5.09865e-11	8.73205e-09	14.7011		CLDN18	1.82615	6.95965	3.74358	0.000241003	0.00702477	0.153165
CD1D	-1.0423	4.20176	-6.96132	5.46688e-11	9.27268e-09	14.634		IGHV1-69	-1.15223	3.67634	-3.74305	0.000241476	0.00702477	0.151355
FCRL2	-1.10874	1.76833	-6.92409	6.74303e-11	1.11165e-08	14.4321		CA9	1.36625	6.04381	3.69583	0.000287384	0.00785963	-0.00904081
TBC1D10C	-1.17239	3.8941	-6.91191	7.22123e-11	1.16865e-08	14.3662		S100P	1.18517	9.26784	3.61008	0.000392521	0.00985967	-0.295798
GIMAP8	-1.01939	4.81814	-6.88309	8.48945e-11	1.34913e-08	14.2105		FAM83A	1.09214	4.54045	3.53321	0.000516636	0.012023	-0.547874
GZMA	-1.2426	5.48241	-6.86176	9.56723e-11	1.4935e-08	14.0955		ADIPOQ	-1.15555	2.1679	-3.53209	0.000518706	0.0120442	-0.551539
VPREB3	-1.87869	3.25331	-6.83582	1.10608e-10	1.71151e-08	13.956		NMU	1.01445	5.15259	3.42008	0.000767819	0.0157492	-0.910269
RAMP3	-1.01872	5.97547	-6.82443	1.17873e-10	1.80807e-08	13.8948		CTSE	1.00443	9.78611	3.22822	0.00146991	0.0242103	-1.50099
TSPAN7	-1.43914	4.76799	-6.81233	1.26104e-10	1.91764e-08	13.8299		CST1	1.09116	7.91729	3.15337	0.00187914	0.0285758	-1.72322
TGFBR3	-1.0888	4.53882	-6.78537	1.4653e-10	2.20923e-08	13.6856
FAM107A	-1.20983	3.78071	-6.78105	1.50091e-10	2.24374e-08	13.6625
CD79A	-2.10257	4.8645	-6.75828	1.70335e-10	2.48324e-08	13.5408
FBLN5	-1.25081	6.82167	-6.73884	1.89728e-10	2.7012e-08	13.4371
S1PR1	-1.06915	5.61436	-6.73869	1.8988e-10	2.7012e-08	13.4364
PRSS22	1.16456	6.23475	6.7293	2.00023e-10	2.82272e-08	13.3863
CHRDL1	-1.857	4.21285	-6.72368	2.06337e-10	2.88872e-08	13.3565
CMA1	-1.26441	1.90929	-6.70149	2.33273e-10	3.21479e-08	13.2385
P2RX5	-1.25101	2.9766	-6.68947	2.49282e-10	3.40879e-08	13.1747
SCARA5	-1.93693	3.1757	-6.67113	2.75813e-10	3.714e-08	13.0775
HLA-DOB	-1.21109	3.85184	-6.66056	2.92337e-10	3.87731e-08	13.0216
FAM129C	-1.23185	2.13223	-6.65841	2.95824e-10	3.89428e-08	13.0102
TNFRSF17	-1.48738	3.04355	-6.6464	3.16011e-10	4.06569e-08	12.9468
CADM3	-1.16884	2.83714	-6.64523	3.18064e-10	4.06569e-08	12.9405
SLCO2A1	-1.13832	6.26998	-6.63809	3.30788e-10	4.16793e-08	12.9029
ABCA8	-1.41326	3.77806	-6.63488	3.36677e-10	4.21204e-08	12.8859
FCRL1	-1.39678	1.72476	-6.63173	3.42538e-10	4.25519e-08	12.8693
MMRN1	-1.50543	3.57092	-6.61986	3.65606e-10	4.42752e-08	12.8067
PLEKHN1	1.07152	4.19352	6.61944	3.6645e-10	4.42752e-08	12.8045
CLU	-1.20419	8.37033	-6.61113	3.83522e-10	4.60227e-08	12.7607
CD19	-1.47184	2.96806	-6.59278	4.24068e-10	5.02051e-08	12.6642
CELF2	-1.04512	4.68464	-6.58891	4.33133e-10	5.09365e-08	12.6438
SOD3	-1.05382	6.77875	-6.5814	4.51299e-10	5.27213e-08	12.6044
RHOH	-1.08083	3.4001	-6.57837	4.58817e-10	5.32469e-08	12.5885
CLEC17A	-1.1816	2.07629	-6.54602	5.4741e-10	6.22988e-08	12.4189
NAP1L2	-1.14734	3.24116	-6.5304	5.96004e-10	6.6965e-08	12.3372
OGN	-1.97945	4.8205	-6.50988	6.66349e-10	7.3465e-08	12.2301
IL33	-1.48454	4.97391	-6.50656	6.78479e-10	7.43377e-08	12.2128
C7	-2.15988	7.72543	-6.50515	6.83698e-10	7.44471e-08	12.2054
NAPSB	-1.27067	5.21854	-6.47825	7.91048e-10	8.40607e-08	12.0654
SLC2A1	1.53236	7.88529	6.47707	7.96112e-10	8.40923e-08	12.0592
ITGAL	-1.09604	4.73586	-6.47294	8.14123e-10	8.54829e-08	12.0378
FCRL5	-1.02526	2.1566	-6.45319	9.05896e-10	9.34503e-08	11.9352
IGF1	-1.28529	2.89689	-6.44424	9.50733e-10	9.66262e-08	11.8888
LMO3	-1.0712	2.81911	-6.44029	9.71225e-10	9.78995e-08	11.8684
EMCN	-1.05244	4.14677	-6.4235	1.06329e-09	1.05968e-07	11.7814
FCER2	-1.50435	2.33744	-6.42086	1.07852e-09	1.06207e-07	11.7678
ANK2	-1.11464	3.34882	-6.42027	1.08193e-09	1.06207e-07	11.7647
CD38	-1.01861	3.00808	-6.41963	1.08569e-09	1.06207e-07	11.7614
TMEM132C	-1.14171	2.85778	-6.41893	1.08977e-09	1.06207e-07	11.7578
AOAH	-1.04453	4.69658	-6.39594	1.23327e-09	1.16962e-07	11.6391
ABCB1	-1.20876	4.22591	-6.34723	1.60138e-09	1.46812e-07	11.3884
PRKCB	-1.06412	2.84054	-6.30808	1.97367e-09	1.74078e-07	11.1879
IGFL3	1.27641	2.37412	6.30136	2.04562e-09	1.79526e-07	11.1535
NKG7	-1.09806	5.09936	-6.29317	2.13676e-09	1.85677e-07	11.1117
GZMH	-1.19765	4.10608	-6.28757	2.20145e-09	1.90361e-07	11.0831
AOX1	-1.49088	4.23061	-6.28556	2.22508e-09	1.91465e-07	11.0729
TEK	-1.08131	4.7462	-6.26735	2.45109e-09	2.06877e-07	10.9801
ALS2CL	1.10743	5.55558	6.26318	2.50598e-09	2.10502e-07	10.9589
GRB7	1.06549	5.79931	6.25693	2.59054e-09	2.16574e-07	10.927
CTSG	-1.42361	3.11325	-6.25489	2.61872e-09	2.17897e-07	10.9167
POU2AF1	-1.44638	4.3221	-6.23861	2.8546e-09	2.35304e-07	10.834
SLC11A1	1.12566	4.92128	6.20184	3.46674e-09	2.77969e-07	10.6477
NTRK2	-1.13416	3.22363	-6.19628	3.56988e-09	2.84944e-07	10.6196
RCSD1	-1.0341	4.26452	-6.18682	3.75246e-09	2.98169e-07	10.5718
CTLA4	-1.02533	3.74231	-6.18292	3.83025e-09	3.01632e-07	10.5521
CORO1A	-1.07014	6.10989	-6.15416	4.45543e-09	3.46403e-07	10.4072
HK2	1.07912	6.94411	6.15407	4.45768e-09	3.46403e-07	10.4067
AQP1	-1.12386	8.59273	-6.15045	4.54312e-09	3.51494e-07	10.3885
AHNAK2	1.27883	6.09765	6.13259	4.98905e-09	3.81076e-07	10.2988
EBI3	-1.01798	3.90149	-6.12238	5.26297e-09	3.9845e-07	10.2476
PTK6	1.39126	6.10432	6.05745	7.38436e-09	5.40499e-07	9.92312
SASH3	-1.03446	5.88917	-6.05306	7.55503e-09	5.48439e-07	9.90124
PKP3	1.033	6.70623	6.01616	9.14837e-09	6.53349e-07	9.71799
CLEC3B	-1.09459	4.73145	-6.00562	9.66101e-09	6.81681e-07	9.66578
NGFR	-1.52637	5.1298	-5.9886	1.05485e-08	7.2403e-07	9.58164
CDH3	1.22281	6.48083	5.9862	1.068e-08	7.30211e-07	9.56979
EPHA2	1.15963	7.25791	5.98279	1.08696e-08	7.4031e-07	9.55293
PLP1	-1.2951	2.60482	-5.97629	1.12402e-08	7.59679e-07	9.52085
SIM2	1.06066	3.54326	5.97009	1.16052e-08	7.75439e-07	9.49025
ITGB4	1.1417	7.84978	5.96683	1.18014e-08	7.82616e-07	9.47421
CLIC3	1.62448	5.82964	5.96053	1.21906e-08	8.05403e-07	9.44315
B3GNT3	1.13662	7.25827	5.92359	1.4737e-08	9.52238e-07	9.26161
ANGPTL1	-1.19847	3.98691	-5.89792	1.68062e-08	1.06641e-06	9.1359
SELL	-1.30784	5.32821	-5.88345	1.80958e-08	1.13598e-06	9.06517
LAMB3	1.22566	8.98044	5.87851	1.85575e-08	1.1561e-06	9.04107
SERINC2	1.02705	8.01782	5.86693	1.9686e-08	1.20577e-06	8.9846
RELN	-1.1743	2.95194	-5.85082	2.13687e-08	1.28917e-06	8.90616
TMEM100	-1.07992	3.6629	-5.81139	2.61015e-08	1.50961e-06	8.71485
FCER1A	-1.34366	4.58348	-5.79761	2.79866e-08	1.59768e-06	8.64818
CD69	-1.21124	4.71104	-5.7814	3.03737e-08	1.70313e-06	8.56994
CR2	-2.1988	3.39554	-5.76334	3.32693e-08	1.83397e-06	8.48291
MZB1	-1.43565	4.62024	-5.72226	4.08967e-08	2.20617e-06	8.28566
RASGRP2	-1.0181	3.58413	-5.71328	4.27779e-08	2.30062e-06	8.24269
ART4	-1.06656	2.75729	-5.70732	4.40735e-08	2.35742e-06	8.21419
SLCO4A1	1.25259	5.25091	5.70199	4.52645e-08	2.40501e-06	8.18872
GFRA3	-1.08172	2.85731	-5.6888	4.83486e-08	2.54588e-06	8.12576
COL14A1	-1.53078	6.72204	-5.67518	5.17496e-08	2.68887e-06	8.06083
SPOCK2	-1.12909	4.92778	-5.67498	5.18006e-08	2.68887e-06	8.05989
IGHM	-1.58396	7.79438	-5.67061	5.29433e-08	2.7228e-06	8.03905
ADM	1.28608	5.90375	5.65372	5.75858e-08	2.89968e-06	7.95878
EVPL	1.15314	5.49947	5.61246	7.06708e-08	3.43425e-06	7.7633
PDK4	-1.24222	6.71752	-5.60743	7.2451e-08	3.50147e-06	7.73956
ITIH5	-1.0005	4.54035	-5.59549	7.68542e-08	3.67401e-06	7.68324
EPS8L1	1.13884	5.81943	5.59334	7.76755e-08	3.70323e-06	7.6731
STYK1	1.02041	3.98188	5.56775	8.8122e-08	4.12747e-06	7.55269
GPC3	-1.11169	5.39333	-5.5456	9.8262e-08	4.51391e-06	7.44877
TREM1	1.05724	4.41993	5.54406	9.90094e-08	4.52468e-06	7.44155
IL7R	-1.25718	5.38245	-5.54346	9.93011e-08	4.52628e-06	7.43874
CTSW	-1.02048	4.17615	-5.54198	1.00027e-07	4.54762e-06	7.43179
CXCL9	-1.59404	5.41035	-5.51892	1.11998e-07	5.00161e-06	7.32397
SFRP1	-1.47373	4.43656	-5.50753	1.18413e-07	5.24828e-06	7.27085
FAM83A	1.87072	4.54045	5.48979	1.29131e-07	5.59675e-06	7.18822
PTGDS	-1.44656	7.65406	-5.47956	1.35728e-07	5.81127e-06	7.14072
ITGA3	1.04155	7.45014	5.47319	1.40009e-07	5.93692e-06	7.11111
MGP	-1.10376	9.79488	-5.45117	1.55827e-07	6.46773e-06	7.00908
MST1R	1.06897	6.11022	5.44217	1.6278e-07	6.70897e-06	6.96747
CLDN4	1.07759	8.34708	5.42873	1.73736e-07	7.07784e-06	6.90539
FUT3	1.13959	6.58664	5.41902	1.82095e-07	7.35047e-06	6.86062
MEOX1	-1.25309	4.15843	-5.39299	2.06479e-07	8.11201e-06	6.74088
VIP	-1.7193	3.55226	-5.38685	2.12674e-07	8.29994e-06	6.71272
PTPRC	-1.10998	5.21266	-5.38101	2.18738e-07	8.49896e-06	6.68595
XPNPEP2	-1.04177	2.0423	-5.36706	2.33924e-07	8.94724e-06	6.62202
PITX1	1.17865	4.72626	5.35613	2.46521e-07	9.29193e-06	6.57207
RERGL	-1.02849	2.48314	-5.35498	2.47886e-07	9.32346e-06	6.56681
PLA2G2A	-2.43252	5.56402	-5.33505	2.72729e-07	1.01283e-05	6.47587
RNF39	1.01893	3.91076	5.28752	3.42136e-07	1.21925e-05	6.26006
CXCL12	-1.21343	5.93367	-5.28331	3.4905e-07	1.23888e-05	6.24102
LIPH	1.03351	6.52061	5.27134	3.69477e-07	1.30091e-05	6.18691
KIAA1324	-1.52204	5.26447	-5.26319	3.84037e-07	1.33898e-05	6.15014
ADCYAP1	-1.33432	3.52631	-5.24967	4.09431e-07	1.41681e-05	6.08923
SLC39A4	1.12623	5.5777	5.2445	4.19567e-07	1.43623e-05	6.06596
GHRL	-1.15878	3.64201	-5.23644	4.35873e-07	1.47861e-05	6.0297
DPT	-1.418	6.05166	-5.23597	4.36846e-07	1.47907e-05	6.02758
CHRDL2	-1.50769	3.96382	-5.23438	4.4013e-07	1.48734e-05	6.02046
FABP4	-1.81622	5.03799	-5.23117	4.46845e-07	1.50426e-05	6.00606
RSPO3	-1.24009	3.81906	-5.2266	4.56597e-07	1.52834e-05	5.98552
ABI3BP	-1.00747	4.42518	-5.21904	4.73162e-07	1.57483e-05	5.95164
IGFL2	1.3249	4.37446	5.19607	5.27208e-07	1.72221e-05	5.8488
ESPN	1.1653	3.70118	5.1801	5.68244e-07	1.82583e-05	5.77755
CASP14	1.22601	1.45362	5.16491	6.1016e-07	1.93012e-05	5.70991
PLEK2	1.04183	7.3401	5.15564	6.37188e-07	2e-05	5.66872
GPX3	-1.04971	7.18243	-5.15197	6.48214e-07	2.03099e-05	5.65242
SCRG1	-1.06855	3.06503	-5.14944	6.55922e-07	2.0515e-05	5.64119
EFNA3	1.00551	4.47086	5.12958	7.19577e-07	2.2269e-05	5.55319
TMPRSS4	1.23257	6.94506	5.12619	7.31041e-07	2.25053e-05	5.53818
SOX21	1.45854	3.06927	5.12393	7.38777e-07	2.25858e-05	5.52818
CD52	-1.05491	7.34258	-5.12219	7.44762e-07	2.27109e-05	5.52051
FER1L4	1.26345	4.11024	5.11974	7.53307e-07	2.29109e-05	5.50968
ADAMTS8	-1.16148	3.44376	-5.11791	7.59754e-07	2.29881e-05	5.50158
ADAP1	1.02349	4.98092	5.11058	7.86106e-07	2.37003e-05	5.4692
CD22	-1.09835	3.16897	-5.11024	7.87322e-07	2.37003e-05	5.46773
MMP28	1.05971	5.84091	5.1093	7.9078e-07	2.37379e-05	5.46357
PGM5	-1.11486	3.81552	-5.10844	7.93942e-07	2.37778e-05	5.45978
PI16	-1.41879	3.46956	-5.09342	8.5125e-07	2.51525e-05	5.39359
XDH	1.07412	4.17703	5.0911	8.60444e-07	2.53817e-05	5.38339
PHLDA2	1.13552	6.82047	5.07368	9.32698e-07	2.71947e-05	5.30683
TCEAL2	-1.15944	3.24987	-5.06016	9.92817e-07	2.88048e-05	5.24754
LEMD1	1.1162	3.62721	5.05318	1.02528e-06	2.95523e-05	5.217
KRT16	1.82844	6.38066	5.02449	1.16996e-06	3.29682e-05	5.09174
IL1RN	1.08709	6.21052	4.97844	1.4445e-06	3.92015e-05	4.8918
GJB2	1.09034	7.64895	4.96521	1.53431e-06	4.09458e-05	4.83461
SLC7A2	-1.12274	5.2559	-4.94928	1.64959e-06	4.34311e-05	4.76593
KRT15	1.09269	4.22491	4.94581	1.67577e-06	4.39235e-05	4.75101
HSPB6	-1.2205	6.99389	-4.9356	1.75526e-06	4.54929e-05	4.70708
COL7A1	1.19836	4.86526	4.89991	2.06282e-06	5.20573e-05	4.5541
KCNA5	-1.01772	3.07779	-4.89056	2.15159e-06	5.37232e-05	4.51419
CAPN6	-1.07501	4.56701	-4.87612	2.2961e-06	5.67109e-05	4.45263
C19orf33	1.26564	8.99514	4.87271	2.33158e-06	5.72031e-05	4.43811
SDR16C5	1.21929	5.58841	4.86071	2.46065e-06	6.00279e-05	4.38709
C2orf40	-1.12133	3.73845	-4.85341	2.5425e-06	6.13539e-05	4.35611
MSLN	1.59194	7.74544	4.8423	2.67215e-06	6.39576e-05	4.30903
LGALS2	-1.27362	6.05145	-4.84046	2.69424e-06	6.43989e-05	4.30124
TMED6	-1.17539	3.56563	-4.81406	3.03131e-06	7.11067e-05	4.18968
THBS4	-1.28426	7.28744	-4.78294	3.48109e-06	7.9439e-05	4.05881
ADAMTS1	-1.06421	6.11289	-4.76386	3.78806e-06	8.50146e-05	3.97889
SLPI	1.08336	9.99066	4.75985	3.85582e-06	8.62219e-05	3.96213
BEX1	-1.51162	5.42782	-4.74717	4.07784e-06	9.00398e-05	3.9092
MFAP4	-1.12435	8.14146	-4.7428	4.15725e-06	9.13248e-05	3.89097
LAMC2	1.0331	8.53036	4.71699	4.65717e-06	0.000100186	3.78366
S100A14	1.15418	8.67604	4.69642	5.09684e-06	0.000107674	3.69843
SRPX	-1.02066	6.31167	-4.69501	5.12833e-06	0.000108081	3.69261
FRZB	-1.00468	6.01119	-4.69448	5.14031e-06	0.000108204	3.69041
SERPINB5	1.23597	5.84181	4.68601	5.33423e-06	0.000111474	3.65543
S100P	1.69504	9.26784	4.68349	5.39342e-06	0.000112193	3.64501
SCEL	1.49257	4.52867	4.68313	5.4017e-06	0.000112233	3.64356
LTB	-1.11918	5.5755	-4.66982	5.72493e-06	0.000117839	3.58868
CALB2	1.35257	4.84742	4.6551	6.10405e-06	0.00012448	3.52814
MARCO	1.38922	5.38471	4.62004	7.10667e-06	0.000140856	3.38462
ONECUT3	1.01819	3.42564	4.60829	7.47716e-06	0.000147207	3.33668
FA2H	1.02223	6.1966	4.59085	8.06105e-06	0.000155834	3.26576
COX6B2	1.10348	3.51921	4.59072	8.06557e-06	0.000155834	3.26523
SPIB	-1.14177	3.3894	-4.5677	8.90482e-06	0.000167822	3.1719
AFAP1-AS1	1.32371	4.49684	4.56699	8.93189e-06	0.000168058	3.16903
SPRR1B	2.06996	4.57632	4.5547	9.41507e-06	0.000174456	3.11937
PCSK1	-1.44562	3.91288	-4.55203	9.52339e-06	0.000175894	3.10859
CPA3	-1.06803	5.96064	-4.54438	9.84027e-06	0.000180065	3.07775
COL17A1	1.65743	6.48092	4.54226	9.92962e-06	0.000181324	3.06923
TRIM29	1.3529	6.61191	4.52344	1.07602e-05	0.000191961	2.99354
ANGPTL7	-1.10169	2.74079	-4.51616	1.10988e-05	0.000196965	2.96436
TNNT1	1.50364	3.5084	4.50435	1.16708e-05	0.00020424	2.91703
PSCA	2.14169	7.03151	4.48873	1.24702e-05	0.000215661	2.85465
WFDC2	1.17174	8.37723	4.47963	1.29601e-05	0.000221528	2.81837
PADI1	1.73653	4.68187	4.43635	1.55546e-05	0.000258852	2.64666
NMU	1.44776	5.15259	4.42747	1.61456e-05	0.000266675	2.61159
PLCXD3	-1.10197	3.46984	-4.42066	1.66129e-05	0.000273209	2.58476
PAEP	1.20211	2.66388	4.35973	2.14186e-05	0.000336742	2.34596
SFN	1.08301	8.43378	4.34151	2.30973e-05	0.000357209	2.2751
C6	-1.55023	5.12176	-4.28514	2.9129e-05	0.000430262	2.05735
PNLIPRP2	-3.04232	5.21895	-4.28498	2.91475e-05	0.000430262	2.05675
EGLN3	1.00357	5.54061	4.28384	2.9284e-05	0.000431915	2.05237
APOH	-1.32062	3.78255	-4.21037	3.94893e-05	0.000546373	1.77213
IGLV6-57	-1.48843	5.72494	-4.19478	4.20553e-05	0.000575592	1.71318
HIST1H2AE	1.00287	3.41799	4.19475	4.206e-05	0.000575592	1.71307
IDO1	-1.06133	4.493	-4.17143	4.61988e-05	0.000621482	1.62521
PTX3	-1.29303	4.0573	-4.12871	5.48077e-05	0.000710888	1.46537
GALNT5	1.00881	5.36912	4.12031	5.6672e-05	0.00072811	1.4341
MMP13	1.05235	2.56098	4.11651	5.75362e-05	0.000735996	1.41995
COL11A1	1.43014	6.44073	4.11487	5.79122e-05	0.000739198	1.41386
PLA2G1B	-3.21265	6.60701	-4.07621	6.74977e-05	0.000828875	1.27075
CPA2	-3.12603	6.397	-4.07292	6.83785e-05	0.000835346	1.25864
RASD1	-1.054	5.6193	-4.07005	6.91571e-05	0.000841912	1.24807
PNLIP	-3.61248	7.02203	-4.06407	7.08059e-05	0.000856665	1.22607
GP2	-2.89625	6.04225	-4.0557	7.31775e-05	0.000879926	1.19531
REG3A	-3.09214	7.20083	-4.03207	8.02887e-05	0.000948622	1.10876
SPRR1A	1.81884	4.14473	4.00341	8.97955e-05	0.00102657	1.00439
ACE2	-1.05192	3.8986	-3.99421	9.30686e-05	0.00105713	0.971011
SFRP4	-1.04287	8.05473	-3.98984	9.46653e-05	0.00107251	0.955154
SYT4	-1.08934	3.31865	-3.98098	9.79753e-05	0.00109732	0.923123
CTRC	-2.84904	5.71645	-3.96951	0.000102428	0.0011414	0.88171
MUC5AC	1.48506	4.92347	3.96806	0.000103004	0.00114564	0.876488
REG3G	-2.52002	4.93463	-3.95283	0.000109247	0.00119623	0.821677
PPP1R1A	-1.11821	3.72806	-3.93828	0.000115548	0.00124361	0.769463
HLA-DRB5	-1.05473	8.45298	-3.93324	0.00011781	0.00126255	0.751423
KRT6A	1.94138	5.42548	3.93066	0.000118982	0.00127025	0.742204
DQX1	1.00931	3.20607	3.92121	0.000123377	0.00130557	0.708446
CELA2A	-2.94617	5.66164	-3.91927	0.000124299	0.00131453	0.701521
PNLIPRP1	-2.39453	4.27482	-3.91043	0.000128579	0.00134767	0.670022
SPRR3	1.67234	4.18734	3.90299	0.000132292	0.00137353	0.643543
SCG2	-1.19307	5.95362	-3.89787	0.000134902	0.00139325	0.625369
GJB6	1.1539	2.89027	3.87632	0.000146444	0.00148892	0.549041
CELA2B	-2.42799	4.67369	-3.86075	0.000155364	0.00156161	0.494096
CPB1	-3.00699	6.76325	-3.85497	0.000158803	0.00158893	0.473755
CAPN8	1.10873	6.25545	3.8435	0.000165843	0.00164723	0.433462
MUC4	1.1453	3.8406	3.83802	0.000169308	0.00167223	0.414262
DSG3	1.18412	2.81065	3.82872	0.000175353	0.0017156	0.381692
GATM	-1.00798	6.9514	-3.82326	0.000178994	0.00174445	0.362615
EREG	1.1613	3.37475	3.82152	0.000180172	0.00175206	0.356525
CLPS	-3.1937	6.80826	-3.81742	0.000182966	0.00176851	0.342239
EDN3	-1.07192	4.45531	-3.81625	0.000183776	0.00177342	0.338141
SST	-1.83052	8.46063	-3.81392	0.000185391	0.00178475	0.33002
KLK1	-1.68569	5.9299	-3.80914	0.000188745	0.00180458	0.313387
HLA-DRB1	-1.09508	9.15178	-3.782	0.000208922	0.00197079	0.219182
SYCN	-2.82455	5.18136	-3.76875	0.000219505	0.00205197	0.173372
AQP8	-1.74812	3.44274	-3.74437	0.000240298	0.0022043	0.0895154
ANGPTL4	1.05149	6.5492	3.73931	0.000244849	0.00222981	0.0721395
TNNI2	1.05349	4.83375	3.7376	0.000246404	0.0022405	0.0662777
SERPINI2	-1.73297	2.96933	-3.73522	0.000248582	0.00225333	0.0581285
CELA3A	-3.0026	7.561	-3.72083	0.000262143	0.00234128	0.00895135
KLK10	1.3146	6.79663	3.71405	0.000268776	0.00238013	-0.0141762
GC	-1.52102	5.94712	-3.70934	0.000273471	0.00241484	-0.0302008
IGHG1	-1.2215	8.93859	-3.7093	0.00027351	0.00241484	-0.0303319
ADIPOQ	-1.33518	2.1679	-3.702	0.000280945	0.00246683	-0.055146
MT1A	-1.06275	4.97299	-3.6952	0.000288053	0.00252172	-0.0782598
REG1B	-2.80373	6.12473	-3.69095	0.000292573	0.00255123	-0.0926587
CPA1	-3.05663	7.0102	-3.67792	0.000306859	0.00264436	-0.136741
SH3GL2	-1.00283	2.65708	-3.66745	0.000318812	0.00273224	-0.172061
SERPINB3	1.32868	2.79651	3.66125	0.000326096	0.00278429	-0.192938
CEL	-2.75781	6.16382	-3.66036	0.000327161	0.00279203	-0.195949
LTF	-1.36268	5.81616	-3.63742	0.000355592	0.00297564	-0.272921
SCG3	-1.34661	4.42311	-3.63	0.000365273	0.00303935	-0.297721
INSM1	-1.08884	3.50579	-3.62915	0.000366404	0.00304732	-0.300573
GSTA2	-1.34759	3.2264	-3.6281	0.000367801	0.00305462	-0.304087
SCGN	-1.47318	5.34137	-3.62587	0.000370771	0.00307205	-0.31151
EPYC	1.45345	3.51177	3.62082	0.000377598	0.00311891	-0.328351
SYT8	1.17305	5.43246	3.60503	0.000399729	0.00323606	-0.380902
CA9	1.46483	6.04381	3.59438	0.000415331	0.00331472	-0.416214
FGL1	-1.20212	3.24023	-3.58199	0.000434197	0.00343926	-0.457171
TNS4	1.10256	5.6094	3.5721	0.000449842	0.0035299	-0.489795
CTRB2	-2.83702	6.72311	-3.53947	0.000505303	0.00386537	-0.596872
SERPINA6	-1.21528	4.56721	-3.53549	0.000512482	0.00390842	-0.609858
NKX2-2	-1.17472	3.65638	-3.51746	0.000546259	0.00409694	-0.668588
MIR7-3HG	-1.24748	3.70882	-3.49754	0.000586013	0.00432341	-0.733186
PDIA2	-1.66184	4.52559	-3.48031	0.000622562	0.00451961	-0.788785
NEUROD1	-1.17768	3.44234	-3.45235	0.000686444	0.00488261	-0.878485
MUC16	1.14083	3.48282	3.40992	0.000795248	0.00549263	-1.01343
SLC30A2	-1.09571	3.53564	-3.40236	0.000816243	0.00560301	-1.0373
MYEOV	1.00721	5.63839	3.4011	0.000819813	0.0056158	-1.0413
APOBEC2	-1.05471	4.01526	-3.39071	0.00084964	0.00577114	-1.07404
TMED11P	-1.16784	2.31915	-3.36073	0.0009415	0.00624598	-1.16801
S100A2	1.37309	6.33147	3.35494	0.000960276	0.00634905	-1.18607
UCA1	1.24308	5.08456	3.3505	0.000974914	0.00642416	-1.1999
GPR87	1.15486	4.20139	3.34397	0.000996818	0.00652705	-1.22022
CHGA	-1.44545	6.53851	-3.33632	0.00102308	0.00665209	-1.24399
RBPJL	-1.19385	2.68818	-3.32651	0.00105767	0.00681173	-1.27438
KLK8	1.19257	3.91011	3.32465	0.00106436	0.00684232	-1.28014
IAPP	-1.52413	3.90673	-3.29677	0.00116937	0.00735387	-1.36605
CELP	-1.08066	2.24993	-3.27759	0.00124709	0.00773781	-1.42475
SLC6A14	1.02127	5.95695	3.2765	0.00125165	0.00776068	-1.42809
IGHV1-69	-1.10532	3.67634	-3.25707	0.0013356	0.00817769	-1.48726
PLIN1	-1.03097	2.63997	-3.18892	0.00167312	0.00984125	-1.69227
PPY	-2.15002	7.23092	-3.18656	0.00168614	0.00990458	-1.69931
CFTR	-1.18036	6.58674	-3.1857	0.00169088	0.00992582	-1.70186
ABCC8	-1.12009	4.30755	-3.15706	0.00185668	0.0106927	-1.78679
IGFBP1	1.06633	3.48468	3.15067	0.00189567	0.0108641	-1.80565
IGHG2	-1.07897	9.31482	-3.14127	0.00195443	0.0111132	-1.83333
KRT17	1.03916	9.2151	3.13544	0.00199171	0.0112753	-1.85046
SPINK1	-1.18988	9.86568	-3.12048	0.00209036	0.0116875	-1.89427
PCSK2	-1.1475	4.22473	-3.11944	0.00209735	0.0117154	-1.8973
PRSS2	-2.12924	9.64415	-3.11659	0.00211674	0.0118013	-1.90563
G6PC2	-1.36219	3.95667	-3.0889	0.00231359	0.012643	-1.98612
CHGB	-1.31962	6.17662	-3.08173	0.00236726	0.0128805	-2.00687
PRSS1	-2.28116	7.54093	-3.03604	0.00273715	0.0144691	-2.13802
ERP27	-1.08782	5.01053	-2.98014	0.00326193	0.0165437	-2.29608
CAPN9	1.00325	4.12364	2.88468	0.00437578	0.0207944	-2.55979
SFRP5	-1.17545	5.69128	-2.84734	0.00489887	0.0227052	-2.6608
DHRS9	1.08365	5.14825	2.83951	0.00501557	0.0231185	-2.68183
SLC30A8	-1.2618	4.77991	-2.8384	0.00503238	0.0231899	-2.68482
CEACAM5	1.49408	8.0591	2.80671	0.00553242	0.024966	-2.76936
REG1A	-1.90768	9.28248	-2.76978	0.00617203	0.0271847	-2.86678
CLDN18	1.4422	6.95965	2.68182	0.00797401	0.0331514	-3.09404
KLK6	1.10925	6.27702	2.5693	0.0109657	0.0425508	-3.37485
VSIG1	1.06654	5.02032	2.54471	0.0117405	0.0447402	-3.43473
KLK7	1.1908	5.93885	2.51711	0.0126679	0.0474038	-3.50129

## Sheet: S5
Table S5 Feature genes of ICI signature A and B
Feature gene	ICI signature
GIMAP7	A
ZNF831	A
SLAMF1	A
MADCAM1	A
DNASE1L3	A
IL24	A
FCRL3	A
RAB39B	A
CCR7	A
CYFIP2	A
IKZF1	A
GIMAP1	A
PPP1R16B	A
ARHGAP15	A
P2RY10	A
CBLN1	A
TIGIT	A
CD1D	A
FCRL2	A
TSPAN7	A
CHRDL1	A
CMA1	A
CLU	A
CD19	A
CELF2	A
CLEC17A	A
NAP1L2	A
EMCN	A
ANK2	A
RCSD1	A
CORO1A	A
SASH3	A
NGFR	A
SELL	A
CR2	A
ADM	A
IL7R	A
PTGDS	A
PLA2G2A	A
CXCL12	A
KIAA1324	A
ADCYAP1	A
GPX3	A
TCEAL2	A
SLC7A2	A
KCNA5	A
LTB	A
PCSK1	A
PLCXD3	A
APOH	A
SYT4	A
PPP1R1A	A
SPRR3	A
SCG2	A
ADIPOQ	A
SH3GL2	A
SCG3	A
INSM1	A
SCGN	A
EPYC	A
NEUROD1	A
CHGA	A
ABCC8	A
PCSK2	A
CHGB	A
CNR2	A
ACAP1	A
FLT3	B
SLC16A3	B
TFAP2A	B
PRKCQ	B
CCL5	B
PRSS22	B
PLEKHN1	B
C7	B
NAPSB	B
SLC2A1	B
LMO3	B
TMEM132C	B
AOAH	B
AOX1	B
GRB7	B
NTRK2	B
HK2	B
AQP1	B
AHNAK2	B
PTK6	B
PKP3	B
CDH3	B
EPHA2	B
ITGB4	B
CLIC3	B
B3GNT3	B
ANGPTL1	B
LAMB3	B
SERINC2	B
SLCO4A1	B
EVPL	B
EPS8L1	B
STYK1	B
GPC3	B
FAM83A	B
ITGA3	B
MGP	B
MST1R	B
CLDN4	B
FUT3	B
VIP	B
PITX1	B
RNF39	B
LIPH	B
SLC39A4	B
GHRL	B
PLEK2	B
TMPRSS4	B
ADAMTS8	B
ADAP1	B
PHLDA2	B
KRT15	B
CAPN6	B
C19orf33	B
SDR16C5	B
MSLN	B
THBS4	B
BEX1	B
LAMC2	B
S100A14	B
SERPINB5	B
S100P	B
COL17A1	B
PADI1	B
NMU	B
SFN	B
C6	B
PNLIPRP2	B
EGLN3	B
PLA2G1B	B
CPA2	B
PNLIP	B
GP2	B
REG3A	B
SFRP4	B
CTRC	B
REG3G	B
CELA2A	B
PNLIPRP1	B
GJB6	B
CELA2B	B
CPB1	B
MUC4	B
GATM	B
CLPS	B
SST	B
KLK1	B
SYCN	B
AQP8	B
SERPINI2	B
CELA3A	B
GC	B
REG1B	B
CPA1	B
CEL	B
GSTA2	B
CTRB2	B
SERPINA6	B
PDIA2	B
SLC30A2	B
APOBEC2	B
TMED11P	B
RBPJL	B
IAPP	B
CELP	B
CFTR	B
SPINK1	B
PRSS2	B
G6PC2	B
PRSS1	B
ERP27	B
SFRP5	B
SLC30A8	B
REG1A	B
REG1A	B

## Sheet: S6
Table S6 Terms of GO enrichment analysis
genes of ICI signature A											genes of ICI signature B
ONTOLOGY	ID	Description	GeneRatio	BgRatio	pvalue	p.adjust	qvalue	geneID	Count		ONTOLOGY	ID	Description	GeneRatio	BgRatio	pvalue	p.adjust	qvalue	geneID	Count
BP	GO:0007159	leukocyte cell-cell adhesion	9/62	337/18670	1.5987e-06	0.00147824	0.00112722	MADCAM1/CCR7/TIGIT/CD1D/CORO1A/SASH3/SELL/IL7R/CXCL12	9		BP	GO:0007586	digestion	12/110	139/18670	3.38568e-11	6.2872e-08	5.62379e-08	AQP1/GHRL/NMU/PNLIPRP2/PNLIP/MUC4/CLPS/SST/CEL/CTRB2/PRSS2/PRSS1	12
BP	GO:0006874	cellular calcium ion homeostasis	10/62	458/18670	2.45647e-06	0.00147824	0.00112722	CCR7/P2RY10/CD19/ANK2/CORO1A/ADM/CXCL12/ADCYAP1/KCNA5/SCGN	10		BP	GO:0031581	hemidesmosome assembly	4/110	12/18670	5.4448e-07	0.00050555	0.000452205	ITGB4/LAMB3/LAMC2/COL17A1	4
BP	GO:0051480	regulation of cytosolic calcium ion concentration	9/62	357/18670	2.56666e-06	0.00147824	0.00112722	CCR7/P2RY10/CD19/ANK2/CORO1A/ADM/ADCYAP1/KCNA5/SCGN	9		BP	GO:0050673	epithelial cell proliferation	13/110	434/18670	1.65936e-06	0.00102714	0.000918761	CCL5/CDH3/EPHA2/GPC3/VIP/GHRL/SDR16C5/THBS4/SERPINB5/SFN/REG3A/REG3G/REG1A	13
BP	GO:0055074	calcium ion homeostasis	10/62	471/18670	3.15189e-06	0.00147824	0.00112722	CCR7/P2RY10/CD19/ANK2/CORO1A/ADM/CXCL12/ADCYAP1/KCNA5/SCGN	10		BP	GO:0008544	epidermis development	13/110	464/18670	3.45795e-06	0.00153385	0.001372	PKP3/CDH3/EPHA2/LAMB3/EVPL/KRT15/LAMC2/COL17A1/SFN/REG3A/SFRP4/REG3G/CELA2A	13
BP	GO:0072503	cellular divalent inorganic cation homeostasis	10/62	493/18670	4.72257e-06	0.00177191	0.00135115	CCR7/P2RY10/CD19/ANK2/CORO1A/ADM/CXCL12/ADCYAP1/KCNA5/SCGN	10		BP	GO:0044241	lipid digestion	4/110	19/18670	4.12991e-06	0.00153385	0.001372	PNLIPRP2/PNLIP/CLPS/CEL	4
BP	GO:0070661	leukocyte proliferation	8/62	298/18670	6.13911e-06	0.0019195	0.00146369	FCRL3/CD1D/CLU/CD19/CORO1A/SASH3/CR2/IL7R	8		BP	GO:0043616	keratinocyte proliferation	5/110	43/18670	5.21761e-06	0.00161485	0.00144445	CDH3/SDR16C5/SFN/REG3A/REG3G	5
BP	GO:0042100	B cell proliferation	5/62	95/18670	1.57825e-05	0.00422971	0.00322533	FCRL3/CD19/SASH3/CR2/IL7R	5		BP	GO:0043588	skin development	12/110	419/18670	6.75114e-06	0.00179098	0.001602	PKP3/CDH3/EPHA2/ITGB4/EVPL/ITGA3/CLDN4/KRT15/SFN/REG3A/REG3G/CELA2A	12
BP	GO:0030098	lymphocyte differentiation	8/62	353/18670	2.09537e-05	0.00491364	0.00374685	FCRL3/CCR7/IKZF1/CD1D/CD19/SASH3/CR2/IL7R	8		BP	GO:0050678	regulation of epithelial cell proliferation	11/110	378/18670	1.43987e-05	0.00334229	0.00298962	CCL5/CDH3/GPC3/VIP/GHRL/THBS4/SERPINB5/SFN/REG3A/REG3G/REG1A	11
BP	GO:0032655	regulation of interleukin-12 production	4/62	54/18670	3.0786e-05	0.00513411	0.00391497	SLAMF1/CCR7/TIGIT/LTB	4		BP	GO:0022600	digestive system process	6/110	100/18670	2.77311e-05	0.00557015	0.0049824	AQP1/GHRL/NMU/PNLIP/MUC4/CEL	6
BP	GO:0050727	regulation of inflammatory response	8/62	374/18670	3.16521e-05	0.00513411	0.00391497	DNASE1L3/CCR7/CMA1/PLA2G2A/ADCYAP1/SLC7A2/ADIPOQ/CNR2	8		BP	GO:0050679	positive regulation of epithelial cell proliferation	8/110	206/18670	2.99954e-05	0.00557015	0.0049824	CCL5/CDH3/VIP/GHRL/THBS4/REG3A/REG3G/REG1A	8
BP	GO:0046651	lymphocyte proliferation	7/62	272/18670	3.19979e-05	0.00513411	0.00391497	FCRL3/CD1D/CD19/CORO1A/SASH3/CR2/IL7R	7		BP	GO:0010837	regulation of keratinocyte proliferation	4/110	33/18670	4.09162e-05	0.00690741	0.00617855	CDH3/SFN/REG3A/REG3G	4
BP	GO:0032943	mononuclear cell proliferation	7/62	274/18670	3.35272e-05	0.00513411	0.00391497	FCRL3/CD1D/CD19/CORO1A/SASH3/CR2/IL7R	7		BP	GO:0009913	epidermal cell differentiation	10/110	358/18670	5.08028e-05	0.00706316	0.00631787	PKP3/CDH3/EPHA2/EVPL/KRT15/SFN/REG3A/SFRP4/REG3G/CELA2A	10
BP	GO:0032615	interleukin-12 production	4/62	56/18670	3.55775e-05	0.00513411	0.00391497	SLAMF1/CCR7/TIGIT/LTB	4		BP	GO:0010838	positive regulation of keratinocyte proliferation	3/110	13/18670	5.452e-05	0.00706316	0.00631787	CDH3/REG3A/REG3G	3
BP	GO:0022407	regulation of cell-cell adhesion	8/62	402/18670	5.27313e-05	0.00706599	0.0053881	CCR7/TIGIT/CD1D/CORO1A/SASH3/IL7R/CXCL12/ADIPOQ	8		BP	GO:0035821	modulation of process of other organism	6/110	113/18670	5.52498e-05	0.00706316	0.00631787	CCL5/AQP1/REG3A/REG3G/REG1B/REG1A	6
BP	GO:1903037	regulation of leukocyte cell-cell adhesion	7/62	304/18670	6.47032e-05	0.00809222	0.00617065	CCR7/TIGIT/CD1D/CORO1A/SASH3/IL7R/CXCL12	7		BP	GO:0018108	peptidyl-tyrosine phosphorylation	10/110	363/18670	5.7053e-05	0.00706316	0.00631787	FLT3/CCL5/NTRK2/PTK6/EPHA2/STYK1/MST1R/GHRL/THBS4/SPINK1	10
BP	GO:0046879	hormone secretion	7/62	308/18670	7.0238e-05	0.00823541	0.00627983	ADM/ADCYAP1/KCNA5/ADIPOQ/NEUROD1/CHGA/ABCC8	7		BP	GO:0018212	peptidyl-tyrosine modification	10/110	366/18670	6.11091e-05	0.00709248	0.00634409	FLT3/CCL5/NTRK2/PTK6/EPHA2/STYK1/MST1R/GHRL/THBS4/SPINK1	10
BP	GO:0050901	leukocyte tethering or rolling	3/62	25/18670	7.61359e-05	0.00840182	0.00640673	MADCAM1/SELL/CXCL12	3		BP	GO:0061844	antimicrobial humoral immune response mediated by antimicrobial peptide	5/110	73/18670	7.07593e-05	0.00772941	0.00691382	PLA2G1B/REG3A/REG3G/REG1B/REG1A	5
BP	GO:0009914	hormone transport	7/62	317/18670	8.41172e-05	0.00863818	0.00658696	ADM/ADCYAP1/KCNA5/ADIPOQ/NEUROD1/CHGA/ABCC8	7		BP	GO:0030216	keratinocyte differentiation	9/110	305/18670	8.07446e-05	0.0082771	0.00740371	PKP3/CDH3/EPHA2/EVPL/KRT15/SFN/REG3A/REG3G/CELA2A	9
BP	GO:0007204	positive regulation of cytosolic calcium ion concentration	7/62	319/18670	8.74869e-05	0.00863818	0.00658696	CCR7/P2RY10/CD19/ANK2/CORO1A/ADM/ADCYAP1	7		BP	GO:0019730	antimicrobial humoral response	6/110	122/18670	8.46876e-05	0.0082771	0.00740371	PLA2G1B/REG3A/REG3G/REG1B/PRSS2/REG1A	6
BP	GO:0050805	negative regulation of synaptic transmission	4/62	72/18670	9.57771e-05	0.00874592	0.00666912	CBLN1/SYT4/ADIPOQ/CNR2	4		BP	GO:0009914	hormone transport	9/110	317/18670	0.000108278	0.0100536	0.00899277	CCL5/SLC2A1/SLCO4A1/VIP/GHRL/NMU/CFTR/G6PC2/SLC30A8	9
BP	GO:0030595	leukocyte chemotaxis	6/62	224/18670	9.79021e-05	0.00874592	0.00666912	CCR7/CORO1A/CXCL12/SCG2/CHGA/CNR2	6		BP	GO:0030072	peptide hormone secretion	8/110	250/18670	0.000116843	0.0103323	0.00924206	CCL5/SLC2A1/VIP/GHRL/NMU/CFTR/G6PC2/SLC30A8	8
BP	GO:0002697	regulation of immune effector process	8/62	462/18670	0.000138651	0.0118231	0.00901562	DNASE1L3/FCRL3/CD1D/CLU/CD19/SASH3/CR2/IL7R	8		BP	GO:0006766	vitamin metabolic process	6/110	134/18670	0.000142051	0.0113207	0.0101262	SLC2A1/AOX1/CTRC/GC/CTRB2/PRSS1	6
BP	GO:0002449	lymphocyte mediated immunity	7/62	352/18670	0.000161024	0.013134	0.0100152	CD1D/CLU/CD19/CORO1A/SASH3/CR2/IL7R	7		BP	GO:0045682	regulation of epidermis development	5/110	85/18670	0.00014611	0.0113207	0.0101262	CDH3/SFN/REG3A/SFRP4/REG3G	5
BP	GO:0051249	regulation of lymphocyte activation	8/62	485/18670	0.00019325	0.0139915	0.0106691	FCRL3/CCR7/TIGIT/CD1D/CD19/CORO1A/SASH3/IL7R	8		BP	GO:0045683	negative regulation of epidermis development	3/110	18/18670	0.000152248	0.0113207	0.0101262	CDH3/REG3A/REG3G	3
BP	GO:0016486	peptide hormone processing	3/62	34/18670	0.000193912	0.0139915	0.0106691	CMA1/PCSK1/PCSK2	3		BP	GO:0034329	cell junction assembly	10/110	409/18670	0.000152406	0.0113207	0.0101262	NTRK2/PKP3/CDH3/EPHA2/ITGB4/LAMB3/GHRL/LAMC2/COL17A1/CEL	10
BP	GO:0140448	signaling receptor ligand precursor processing	3/62	34/18670	0.000193912	0.0139915	0.0106691	CMA1/PCSK1/PCSK2	3		BP	GO:0006767	water-soluble vitamin metabolic process	5/110	88/18670	0.000172079	0.0122904	0.0109936	SLC2A1/AOX1/CTRC/CTRB2/PRSS1	5
BP	GO:0097484	dendrite extension	3/62	35/18670	0.00021159	0.0147016	0.0112106	CYFIP2/SYT4/SH3GL2	3		BP	GO:0006833	water transport	3/110	19/18670	0.00018002	0.0123814	0.0110749	AQP1/AQP8/CFTR	3
BP	GO:0046883	regulation of hormone secretion	6/62	262/18670	0.00022962	0.0148631	0.0113337	ADCYAP1/KCNA5/ADIPOQ/NEUROD1/CHGA/ABCC8	6		BP	GO:0090276	regulation of peptide hormone secretion	7/110	208/18670	0.000232408	0.0154136	0.0137872	CCL5/SLC2A1/GHRL/NMU/CFTR/G6PC2/SLC30A8	7
BP	GO:0050900	leukocyte migration	8/62	499/18670	0.000234399	0.0148631	0.0113337	MADCAM1/CCR7/CORO1A/SELL/CXCL12/SCG2/CHGA/CNR2	8		BP	GO:0009235	cobalamin metabolic process	3/110	22/18670	0.000282442	0.0174832	0.0156384	CTRC/CTRB2/PRSS1	3
BP	GO:0001906	cell killing	5/62	168/18670	0.000237683	0.0148631	0.0113337	DNASE1L3/CD1D/CORO1A/IL7R/CHGA	5		BP	GO:0071577	zinc ion transmembrane transport	3/110	22/18670	0.000282442	0.0174832	0.0156384	SLC39A4/SLC30A2/SLC30A8	3
BP	GO:0038179	neurotrophin signaling pathway	3/62	39/18670	0.00029267	0.0172778	0.013175	CYFIP2/CORO1A/NGFR	3		BP	GO:0030198	extracellular matrix organization	9/110	368/18670	0.000328673	0.0194553	0.0174024	ITGB4/LAMB3/ITGA3/LAMC2/SERPINB5/COL17A1/CTRB2/PRSS2/PRSS1	9
BP	GO:0001936	regulation of endothelial cell proliferation	5/62	176/18670	0.000294717	0.0172778	0.013175	PPP1R16B/NGFR/CXCL12/APOH/SCG2	5		BP	GO:0043062	extracellular structure organization	9/110	369/18670	0.000335255	0.0194553	0.0174024	ITGB4/LAMB3/ITGA3/LAMC2/SERPINB5/COL17A1/CTRB2/PRSS2/PRSS1	9
BP	GO:0010959	regulation of metal ion transport	7/62	394/18670	0.000320062	0.0181951	0.0138745	FCRL3/CD19/ANK2/CORO1A/CXCL12/ADCYAP1/KCNA5	7		BP	GO:0045604	regulation of epidermal cell differentiation	4/110	61/18670	0.000459722	0.0253868	0.022708	SFN/REG3A/SFRP4/REG3G	4
BP	GO:0061756	leukocyte adhesion to vascular endothelial cell	3/62	44/18670	0.000419149	0.022511	0.0171656	MADCAM1/SELL/CXCL12	3		BP	GO:0042044	fluid transport	3/110	26/18670	0.000468744	0.0253868	0.022708	AQP1/AQP8/CFTR	3
BP	GO:0001935	endothelial cell proliferation	5/62	191/18670	0.000429015	0.022511	0.0171656	PPP1R16B/NGFR/CXCL12/APOH/SCG2	5		BP	GO:0046879	hormone secretion	8/110	308/18670	0.00047848	0.0253868	0.022708	CCL5/SLC2A1/VIP/GHRL/NMU/CFTR/G6PC2/SLC30A8	8
BP	GO:0001909	leukocyte mediated cytotoxicity	4/62	107/18670	0.00044056	0.022511	0.0171656	DNASE1L3/CD1D/CORO1A/IL7R	4		BP	GO:0006829	zinc ion transport	3/110	27/18670	0.000525083	0.0270855	0.0242275	SLC39A4/SLC30A2/SLC30A8	3
BP	GO:0002673	regulation of acute inflammatory response	3/62	46/18670	0.000478156	0.022511	0.0171656	DNASE1L3/CCR7/ADCYAP1	3		BP	GO:0006972	hyperosmotic response	3/110	28/18670	0.00058558	0.0292118	0.0261294	SLC2A1/AQP1/SST	3
BP	GO:0086070	SA node cell to atrial cardiac muscle cell communication	2/62	10/18670	0.000479979	0.022511	0.0171656	ANK2/KCNA5	2		BP	GO:0048871	multicellular organismal homeostasis	10/110	486/18670	0.000597765	0.0292118	0.0261294	AQP1/CDH3/CLDN4/GHRL/NMU/SFN/MUC4/GATM/IAPP/CFTR	10
BP	GO:0097048	dendritic cell apoptotic process	2/62	10/18670	0.000479979	0.022511	0.0171656	CCR7/CXCL12	2		BP	GO:0050796	regulation of insulin secretion	6/110	176/18670	0.000614122	0.0292417	0.0261561	CCL5/SLC2A1/GHRL/CFTR/G6PC2/SLC30A8	6
BP	GO:2000668	regulation of dendritic cell apoptotic process	2/62	10/18670	0.000479979	0.022511	0.0171656	CCR7/CXCL12	2		BP	GO:0050891	multicellular organismal water homeostasis	4/110	68/18670	0.000695119	0.0322709	0.0288657	AQP1/CLDN4/SFN/CFTR	4
BP	GO:0060326	cell chemotaxis	6/62	304/18670	0.000507118	0.02276	0.0173555	CCR7/CORO1A/CXCL12/SCG2/CHGA/CNR2	6		BP	GO:0050730	regulation of peptidyl-tyrosine phosphorylation	7/110	256/18670	0.00080509	0.0364647	0.032617	FLT3/CCL5/NTRK2/PTK6/GHRL/THBS4/SPINK1	7
BP	GO:2000107	negative regulation of leukocyte apoptotic process	3/62	47/18670	0.000509553	0.02276	0.0173555	CCR7/IL7R/CXCL12	3		BP	GO:0060193	positive regulation of lipase activity	4/110	72/18670	0.000862433	0.0373948	0.033449	CCL5/NTRK2/PLA2G1B/PNLIP	4
BP	GO:0050870	positive regulation of T cell activation	5/62	202/18670	0.000553633	0.0241538	0.0184183	CCR7/CD1D/CORO1A/SASH3/IL7R	5		BP	GO:0010466	negative regulation of peptidase activity	7/110	262/18670	0.00092176	0.0373948	0.033449	AQP1/GPC3/SERPINB5/SFN/SERPINI2/SERPINA6/SPINK1	7
BP	GO:0002683	negative regulation of immune system process	7/62	435/18670	0.000578623	0.0246704	0.0188122	FCRL3/TIGIT/IL7R/CXCL12/ADCYAP1/ADIPOQ/CNR2	7		BP	GO:0015850	organic hydroxy compound transport	7/110	262/18670	0.00092176	0.0373948	0.033449	SLC16A3/AQP1/VIP/GHRL/PNLIP/CEL/CFTR	7
BP	GO:0050863	regulation of T cell activation	6/62	314/18670	0.000601166	0.025062	0.0191108	CCR7/TIGIT/CD1D/CORO1A/SASH3/IL7R	6		BP	GO:0046883	regulation of hormone secretion	7/110	262/18670	0.00092176	0.0373948	0.033449	CCL5/SLC2A1/GHRL/NMU/CFTR/G6PC2/SLC30A8	7
BP	GO:0030073	insulin secretion	5/62	207/18670	0.000618509	0.0252244	0.0192346	ADCYAP1/KCNA5/NEUROD1/CHGA/ABCC8	5		BP	GO:0042755	eating behavior	3/110	33/18670	0.000954607	0.0373948	0.033449	GHRL/NMU/IAPP	3
BP	GO:0090276	regulation of peptide hormone secretion	5/62	208/18670	0.000632141	0.0252318	0.0192403	ADCYAP1/KCNA5/NEUROD1/CHGA/ABCC8	5		BP	GO:0030104	water homeostasis	4/110	74/18670	0.000955915	0.0373948	0.033449	AQP1/CLDN4/SFN/CFTR	4
BP	GO:0016485	protein processing	5/62	217/18670	0.000765212	0.0293105	0.0223504	CYFIP2/CMA1/PCSK1/APOH/PCSK2	5		BP	GO:0050731	positive regulation of peptidyl-tyrosine phosphorylation	6/110	192/18670	0.000966587	0.0373948	0.033449	FLT3/CCL5/NTRK2/PTK6/GHRL/THBS4	6
BP	GO:0051209	release of sequestered calcium ion into cytosol	4/62	124/18670	0.000767925	0.0293105	0.0223504	CCR7/CD19/ANK2/CORO1A	4		BP	GO:0010827	regulation of glucose transmembrane transport	4/110	78/18670	0.00116389	0.044109	0.0394547	SLC2A1/HK2/GPC3/PLA2G1B	4
BP	GO:1903039	positive regulation of leukocyte cell-cell adhesion	5/62	218/18670	0.000781195	0.0293105	0.0223504	CCR7/CD1D/CORO1A/SASH3/IL7R	5		BP	GO:0006959	humoral immune response	8/110	356/18670	0.00122381	0.0449077	0.0401691	C7/C6/PLA2G1B/REG3A/REG3G/REG1B/PRSS2/REG1A	8
BP	GO:0051283	negative regulation of sequestering of calcium ion	4/62	126/18670	0.000815284	0.0293652	0.0223922	CCR7/CD19/ANK2/CORO1A	4		BP	GO:0006882	cellular zinc ion homeostasis	3/110	36/18670	0.00123333	0.0449077	0.0401691	SLC39A4/SLC30A2/SLC30A8	3
BP	GO:0002864	regulation of acute inflammatory response to antigenic stimulus	2/62	13/18670	0.000826638	0.0293652	0.0223922	CCR7/ADCYAP1	2		BP	GO:0030073	insulin secretion	6/110	207/18670	0.0014222	0.0506224	0.0452808	CCL5/SLC2A1/GHRL/CFTR/G6PC2/SLC30A8	6
BP	GO:0051251	positive regulation of lymphocyte activation	6/62	334/18670	0.000829614	0.0293652	0.0223922	FCRL3/CCR7/CD1D/CORO1A/SASH3/IL7R	6		BP	GO:0055069	zinc ion homeostasis	3/110	38/18670	0.0014448	0.0506224	0.0452808	SLC39A4/SLC30A2/SLC30A8	3
BP	GO:0001819	positive regulation of cytokine production	7/62	464/18670	0.000846043	0.0293922	0.0224127	CCR7/TIGIT/CLU/SASH3/ADCYAP1/LTB/ADIPOQ	7		BP	GO:0060456	positive regulation of digestive system process	2/110	10/18670	0.00150093	0.0516154	0.046169	AQP1/GHRL	2
BP	GO:0051282	regulation of sequestering of calcium ion	4/62	128/18670	0.000864671	0.0294932	0.0224897	CCR7/CD19/ANK2/CORO1A	4		BP	GO:0019835	cytolysis	3/110	40/18670	0.00167771	0.0556342	0.0497638	C7/C6/REG3G	3
BP	GO:0050671	positive regulation of lymphocyte proliferation	4/62	130/18670	0.000916134	0.0304901	0.02325	FCRL3/CD1D/CORO1A/SASH3	4		BP	GO:0044058	regulation of digestive system process	3/110	40/18670	0.00167771	0.0556342	0.0497638	AQP1/GHRL/NMU	3
BP	GO:0032946	positive regulation of mononuclear cell proliferation	4/62	131/18670	0.000942659	0.0304901	0.02325	FCRL3/CD1D/CORO1A/SASH3	4		BP	GO:0061097	regulation of protein tyrosine kinase activity	4/110	88/18670	0.00181901	0.0588144	0.0526084	CCL5/NTRK2/PTK6/GHRL	4
BP	GO:0051208	sequestering of calcium ion	4/62	131/18670	0.000942659	0.0304901	0.02325	CCR7/CD19/ANK2/CORO1A	4		BP	GO:0008643	carbohydrate transport	5/110	148/18670	0.00183696	0.0588144	0.0526084	SLC2A1/HK2/AQP1/GPC3/PLA2G1B	5
BP	GO:0050930	induction of positive chemotaxis	2/62	14/18670	0.00096235	0.0305995	0.0233333	CXCL12/SCG2	2		BP	GO:0030510	regulation of BMP signaling pathway	4/110	91/18670	0.00205693	0.0646172	0.0577989	GPC3/ITGA3/SFRP4/SFRP5	4
BP	GO:0002920	regulation of humoral immune response	4/62	134/18670	0.00102548	0.0320632	0.0244495	CCR7/CLU/CD19/CR2	4		BP	GO:0031424	keratinization	6/110	224/18670	0.00211931	0.0646172	0.0577989	PKP3/CDH3/EVPL/KRT15/SFN/CELA2A	6
BP	GO:0034113	heterotypic cell-cell adhesion	3/62	61/18670	0.00109424	0.0329947	0.0251598	MADCAM1/CD1D/ADIPOQ	3		BP	GO:0014831	gastro-intestinal system smooth muscle contraction	2/110	12/18670	0.00218448	0.0646172	0.0577989	GHRL/NMU	2
BP	GO:0045123	cellular extravasation	3/62	61/18670	0.00109424	0.0329947	0.0251598	MADCAM1/SELL/CXCL12	3		BP	GO:0030157	pancreatic juice secretion	2/110	12/18670	0.00218448	0.0646172	0.0577989	AQP1/CEL	2
BP	GO:0033604	negative regulation of catecholamine secretion	2/62	15/18670	0.00110803	0.0329947	0.0251598	SYT4/CHGA	2		BP	GO:0071622	regulation of granulocyte chemotaxis	3/110	44/18670	0.0022109	0.0646172	0.0577989	CCL5/THBS4/S100A14	3
BP	GO:0050433	regulation of catecholamine secretion	3/62	62/18670	0.00114717	0.0330457	0.0251987	CXCL12/SYT4/CHGA	3		BP	GO:0007589	body fluid secretion	4/110	93/18670	0.00222698	0.0646172	0.0577989	HK2/AQP1/VIP/CEL	4
BP	GO:0006959	humoral immune response	6/62	356/18670	0.00115298	0.0330457	0.0251987	CCR7/CLU/CD19/CR2/PLA2G2A/CHGA	6		BP	GO:0090277	positive regulation of peptide hormone secretion	4/110	96/18670	0.00249987	0.070886	0.0634063	GHRL/NMU/CFTR/SLC30A8	4
BP	GO:0070665	positive regulation of leukocyte proliferation	4/62	139/18670	0.00117468	0.0330457	0.0251987	FCRL3/CD1D/CORO1A/SASH3	4		BP	GO:0061478	response to platelet aggregation inhibitor	2/110	13/18670	0.00257175	0.070886	0.0634063	CFTR/REG1A	2
BP	GO:0097553	calcium ion transmembrane import into cytosol	4/62	140/18670	0.00120625	0.0330457	0.0251987	CCR7/CD19/ANK2/CORO1A	4		BP	GO:0007044	cell-substrate junction assembly	4/110	97/18670	0.00259572	0.070886	0.0634063	ITGB4/LAMB3/LAMC2/COL17A1	4
BP	GO:0002460	adaptive immune response based on somatic recombination of immune receptors built from immunoglobulin superfamily domains	6/62	361/18670	0.00123839	0.0330457	0.0251987	CD1D/CLU/CD19/SASH3/CR2/IL7R	6		BP	GO:0150115	cell-substrate junction organization	4/110	97/18670	0.00259572	0.070886	0.0634063	ITGB4/LAMB3/LAMC2/COL17A1	4
BP	GO:0050432	catecholamine secretion	3/62	64/18670	0.00125782	0.0330457	0.0251987	CXCL12/SYT4/CHGA	3		BP	GO:0060191	regulation of lipase activity	4/110	98/18670	0.00269406	0.0725053	0.0648547	CCL5/NTRK2/PLA2G1B/PNLIP	4
BP	GO:0032695	negative regulation of interleukin-12 production	2/62	16/18670	0.00126362	0.0330457	0.0251987	SLAMF1/TIGIT	2		BP	GO:0045605	negative regulation of epidermal cell differentiation	2/110	14/18670	0.00298886	0.078579	0.0702875	REG3A/REG3G	2
BP	GO:0035296	regulation of tube diameter	4/62	143/18670	0.00130452	0.0330457	0.0251987	ADM/ADCYAP1/KCNA5/CHGA	4		BP	GO:0007631	feeding behavior	4/110	101/18670	0.00300437	0.078579	0.0702875	NTRK2/GHRL/NMU/IAPP	4
BP	GO:0097746	regulation of blood vessel diameter	4/62	143/18670	0.00130452	0.0330457	0.0251987	ADM/ADCYAP1/KCNA5/CHGA	4		BP	GO:0015698	inorganic anion transport	5/110	169/18670	0.00326401	0.0841842	0.0753012	CLIC3/CLDN4/ADAMTS8/SFRP4/CFTR	5
BP	GO:0002791	regulation of peptide secretion	7/62	500/18670	0.00130501	0.0330457	0.0251987	CCR7/ADCYAP1/KCNA5/SYT4/NEUROD1/CHGA/ABCC8	7		BP	GO:0001523	retinoid metabolic process	4/110	104/18670	0.00333827	0.0849201	0.0759594	GPC3/SDR16C5/PNLIP/CLPS	4
BP	GO:0050854	regulation of antigen receptor-mediated signaling pathway	3/62	65/18670	0.00131558	0.0330457	0.0251987	FCRL3/CCR7/CD19	3		BP	GO:0030299	intestinal cholesterol absorption	2/110	15/18670	0.00343545	0.0850619	0.0760863	PNLIP/CEL	2
BP	GO:0035150	regulation of tube size	4/62	144/18670	0.00133849	0.0330457	0.0251987	ADM/ADCYAP1/KCNA5/CHGA	4		BP	GO:0071474	cellular hyperosmotic response	2/110	15/18670	0.00343545	0.0850619	0.0760863	SLC2A1/AQP1	2
BP	GO:0048872	homeostasis of number of cells	5/62	246/18670	0.00133874	0.0330457	0.0251987	CCR7/IKZF1/CORO1A/SASH3/IL7R	5		BP	GO:0016042	lipid catabolic process	7/110	333/18670	0.00357868	0.0874422	0.0782154	AOAH/LIPH/PNLIPRP2/PLA2G1B/PNLIP/CLPS/CEL	7
BP	GO:0045834	positive regulation of lipid metabolic process	4/62	146/18670	0.00140827	0.03371	0.0257053	CCR7/CD19/ADM/ADIPOQ	4		BP	GO:0010951	negative regulation of endopeptidase activity	6/110	250/18670	0.00364915	0.0880062	0.07872	AQP1/SERPINB5/SFN/SERPINI2/SERPINA6/SPINK1	6
BP	GO:0045666	positive regulation of neuron differentiation	6/62	371/18670	0.0014237	0.03371	0.0257053	NAP1L2/NGFR/CXCL12/ADCYAP1/SYT4/NEUROD1	6		BP	GO:0071320	cellular response to cAMP	3/110	53/18670	0.00376357	0.0896018	0.0801472	AQP1/AQP8/CFTR	3
BP	GO:0048535	lymph node development	2/62	17/18670	0.00142904	0.03371	0.0257053	IL7R/LTB	2		BP	GO:1904659	glucose transmembrane transport	4/110	108/18670	0.00382163	0.0898324	0.0803535	SLC2A1/HK2/GPC3/PLA2G1B	4
BP	GO:0030072	peptide hormone secretion	5/62	250/18670	0.00143753	0.03371	0.0257053	ADCYAP1/KCNA5/NEUROD1/CHGA/ABCC8	5		BP	GO:0051238	sequestering of metal ion	2/110	16/18670	0.00391118	0.0907882	0.0812084	SLC30A2/SLC30A8	2
BP	GO:0008016	regulation of heart contraction	5/62	251/18670	0.00146304	0.0338848	0.0258385	CELF2/ANK2/ADM/KCNA5/CHGA	5		BP	GO:0016101	diterpenoid metabolic process	4/110	110/18670	0.00408021	0.0921339	0.0824121	GPC3/SDR16C5/PNLIP/CLPS	4
BP	GO:0050918	positive chemotaxis	3/62	68/18670	0.0014988	0.0342896	0.0261472	CORO1A/CXCL12/SCG2	3		BP	GO:0061098	positive regulation of protein tyrosine kinase activity	3/110	55/18670	0.00417915	0.0921339	0.0824121	CCL5/NTRK2/GHRL	3
BP	GO:0051924	regulation of calcium ion transport	5/62	254/18670	0.0015416	0.0348439	0.0265699	FCRL3/CD19/ANK2/CORO1A/CXCL12	5		BP	GO:0098661	inorganic anion transmembrane transport	4/110	111/18670	0.00421383	0.0921339	0.0824121	CLIC3/CLDN4/ADAMTS8/CFTR	4
BP	GO:0022409	positive regulation of cell-cell adhesion	5/62	255/18670	0.00156846	0.035029	0.0267111	CCR7/CD1D/CORO1A/SASH3/IL7R	5		BP	GO:0043434	response to peptide hormone	8/110	436/18670	0.00427427	0.0921339	0.0824121	PRKCQ/SLC2A1/GHRL/PLA2G1B/REG3A/REG3G/REG1B/REG1A	8
BP	GO:0002696	positive regulation of leukocyte activation	6/62	380/18670	0.00160799	0.0354893	0.027062	FCRL3/CCR7/CD1D/CORO1A/SASH3/IL7R	6		BP	GO:0008645	hexose transmembrane transport	4/110	112/18670	0.00435038	0.0921339	0.0824121	SLC2A1/HK2/GPC3/PLA2G1B	4
BP	GO:0002709	regulation of T cell mediated immunity	3/62	70/18670	0.00162939	0.0355435	0.0271034	CD1D/SASH3/IL7R	3		BP	GO:0070268	cornification	4/110	112/18670	0.00435038	0.0921339	0.0824121	PKP3/EVPL/KRT15/CELA2A	4
BP	GO:0015850	organic hydroxy compound transport	5/62	262/18670	0.00176628	0.0380867	0.0290427	CLU/CXCL12/SYT4/ADIPOQ/CHGA	5		BP	GO:0045187	regulation of circadian sleep/wake cycle, sleep	2/110	17/18670	0.00441568	0.0921339	0.0824121	GHRL/NMU	2
BP	GO:0060402	calcium ion transport into cytosol	4/62	158/18670	0.00188119	0.0400151	0.0305132	CCR7/CD19/ANK2/CORO1A	4		BP	GO:0048521	negative regulation of behavior	2/110	17/18670	0.00441568	0.0921339	0.0824121	GHRL/NMU	2
BP	GO:0050867	positive regulation of cell activation	6/62	394/18670	0.00193019	0.0400151	0.0305132	FCRL3/CCR7/CD1D/CORO1A/SASH3/IL7R	6		BP	GO:0098856	intestinal lipid absorption	2/110	17/18670	0.00441568	0.0921339	0.0824121	PNLIP/CEL	2
BP	GO:0032680	regulation of tumor necrosis factor production	4/62	160/18670	0.00196949	0.0400151	0.0305132	SLAMF1/CLU/SASH3/ADIPOQ	4		BP	GO:0015749	monosaccharide transmembrane transport	4/110	114/18670	0.00463239	0.095463	0.0853899	SLC2A1/HK2/GPC3/PLA2G1B	4
BP	GO:0086014	atrial cardiac muscle cell action potential	2/62	20/18670	0.00198369	0.0400151	0.0305132	ANK2/KCNA5	2		BP	GO:0007369	gastrulation	5/110	185/18670	0.00479029	0.095463	0.0853899	EPHA2/ITGB4/LAMB3/GPC3/ITGA3	5
BP	GO:0086026	atrial cardiac muscle cell to AV node cell signaling	2/62	20/18670	0.00198369	0.0400151	0.0305132	ANK2/KCNA5	2		BP	GO:0034219	carbohydrate transmembrane transport	4/110	116/18670	0.00492645	0.095463	0.0853899	SLC2A1/HK2/GPC3/PLA2G1B	4
BP	GO:0086066	atrial cardiac muscle cell to AV node cell communication	2/62	20/18670	0.00198369	0.0400151	0.0305132	ANK2/KCNA5	2		BP	GO:0009312	oligosaccharide biosynthetic process	2/110	18/18670	0.00494861	0.095463	0.0853899	SLC2A1/FUT3	2
BP	GO:0001937	negative regulation of endothelial cell proliferation	3/62	76/18670	0.00206321	0.0411764	0.0313987	NGFR/APOH/SCG2	3		BP	GO:0070233	negative regulation of T cell apoptotic process	2/110	18/18670	0.00494861	0.095463	0.0853899	PRKCQ/CCL5	2
BP	GO:0032640	tumor necrosis factor production	4/62	163/18670	0.00210726	0.0411794	0.031401	SLAMF1/CLU/SASH3/ADIPOQ	4		BP	GO:0070633	transepithelial transport	2/110	18/18670	0.00494861	0.095463	0.0853899	AQP1/CFTR	2
BP	GO:1903555	regulation of tumor necrosis factor superfamily cytokine production	4/62	163/18670	0.00210726	0.0411794	0.031401	SLAMF1/CLU/SASH3/ADIPOQ	4		BP	GO:0090026	positive regulation of monocyte chemotaxis	2/110	18/18670	0.00494861	0.095463	0.0853899	CCL5/S100A14	2
BP	GO:0051937	catecholamine transport	3/62	77/18670	0.00214181	0.0413833	0.0315564	CXCL12/SYT4/CHGA	3		BP	GO:0031589	cell-substrate adhesion	7/110	354/18670	0.00498649	0.095463	0.0853899	ITGB4/LAMB3/ITGA3/MSLN/LAMC2/COL17A1/MUC4	7
BP	GO:0045785	positive regulation of cell adhesion	6/62	403/18670	0.00216181	0.0413833	0.0315564	CCR7/CD1D/CORO1A/SASH3/IL7R/CXCL12	6		BP	GO:0010518	positive regulation of phospholipase activity	3/110	59/18670	0.0050913	0.0962133	0.0860611	CCL5/NTRK2/PLA2G1B	3
BP	GO:0002438	acute inflammatory response to antigenic stimulus	2/62	21/18670	0.00218782	0.0414582	0.0316135	CCR7/ADCYAP1	2		BP	GO:0043491	protein kinase B signaling	6/110	269/18670	0.00520129	0.0962133	0.0860611	CCL5/NTRK2/EPHA2/MST1R/IAPP/SFRP5	6
BP	GO:0001910	regulation of leukocyte mediated cytotoxicity	3/62	78/18670	0.00222225	0.0416894	0.0317899	DNASE1L3/CD1D/IL7R	3		BP	GO:0052547	regulation of peptidase activity	8/110	452/18670	0.00529234	0.0962133	0.0860611	AQP1/GPC3/SERPINB5/SFN/EGLN3/SERPINI2/SERPINA6/SPINK1	8
BP	GO:0071706	tumor necrosis factor superfamily cytokine production	4/62	168/18670	0.00235147	0.0432487	0.0329789	SLAMF1/CLU/SASH3/ADIPOQ	4		BP	GO:0045861	negative regulation of proteolysis	7/110	358/18670	0.00529624	0.0962133	0.0860611	AQP1/GPC3/SERPINB5/SFN/SERPINI2/SERPINA6/SPINK1	7
BP	GO:1990138	neuron projection extension	4/62	168/18670	0.00235147	0.0432487	0.0329789	CYFIP2/CXCL12/SYT4/SH3GL2	4		BP	GO:0033013	tetrapyrrole metabolic process	3/110	60/18670	0.00533655	0.0962133	0.0860611	CTRC/CTRB2/PRSS1	3
BP	GO:0060047	heart contraction	5/62	282/18670	0.00243252	0.044305	0.0337843	CELF2/ANK2/ADM/KCNA5/CHGA	5		BP	GO:0046324	regulation of glucose import	3/110	60/18670	0.00533655	0.0962133	0.0860611	HK2/GPC3/PLA2G1B	3
BP	GO:0051604	protein maturation	5/62	285/18670	0.00254631	0.0457869	0.0349144	CYFIP2/CMA1/PCSK1/APOH/PCSK2	5		BP	GO:0001696	gastric acid secretion	2/110	19/18670	0.00550962	0.0981852	0.0878249	GHRL/NMU	2
BP	GO:0051279	regulation of release of sequestered calcium ion into cytosol	3/62	82/18670	0.0025627	0.0457869	0.0349144	CD19/ANK2/CORO1A	3		BP	GO:0006721	terpenoid metabolic process	4/110	120/18670	0.00555167	0.0981852	0.0878249	GPC3/SDR16C5/PNLIP/CLPS	4
BP	GO:2000106	regulation of leukocyte apoptotic process	3/62	83/18670	0.00265256	0.0469453	0.0357977	CCR7/IL7R/CXCL12	3		BP	GO:0001704	formation of primary germ layer	4/110	121/18670	0.00571587	0.100136	0.0895694	EPHA2/ITGB4/LAMB3/ITGA3	4
BP	GO:0003018	vascular process in circulatory system	4/62	175/18670	0.00272522	0.0474324	0.0361691	ADM/ADCYAP1/KCNA5/CHGA	4		BP	GO:0071621	granulocyte chemotaxis	4/110	123/18670	0.00605393	0.104858	0.0937936	CCL5/THBS4/S100A14/PLA2G1B	4
BP	GO:0097756	negative regulation of blood vessel diameter	3/62	84/18670	0.00274434	0.0474324	0.0361691	ADM/KCNA5/CHGA	3		BP	GO:0050802	circadian sleep/wake cycle, sleep	2/110	20/18670	0.00609837	0.104858	0.0937936	GHRL/NMU	2
BP	GO:0050796	regulation of insulin secretion	4/62	176/18670	0.00278174	0.0474324	0.0361691	KCNA5/NEUROD1/CHGA/ABCC8	4		BP	GO:0046717	acid secretion	4/110	124/18670	0.00622784	0.106102	0.0949062	NTRK2/GHRL/NMU/PLA2G1B	4
BP	GO:0060401	cytosolic calcium ion transport	4/62	176/18670	0.00278174	0.0474324	0.0361691	CCR7/CD19/ANK2/CORO1A	4		BP	GO:0042749	regulation of circadian sleep/wake cycle	2/110	21/18670	0.00671451	0.112998	0.101075	GHRL/NMU	2
BP	GO:0003015	heart process	5/62	292/18670	0.00282683	0.0474324	0.0361691	CELF2/ANK2/ADM/KCNA5/CHGA	5		BP	GO:0046887	positive regulation of hormone secretion	4/110	127/18670	0.00676946	0.112998	0.101075	GHRL/NMU/CFTR/SLC30A8	4
BP	GO:0006941	striated muscle contraction	4/62	177/18670	0.00283906	0.0474324	0.0361691	ANK2/RCSD1/KCNA5/CHGA	4		BP	GO:0050708	regulation of protein secretion	8/110	472/18670	0.0068152	0.112998	0.101075	CCL5/SLC2A1/GHRL/NMU/PLA2G1B/CFTR/G6PC2/SLC30A8	8
BP	GO:0002861	regulation of inflammatory response to antigenic stimulus	2/62	24/18670	0.00285707	0.0474324	0.0361691	CCR7/ADCYAP1	2		BP	GO:0033627	cell adhesion mediated by integrin	3/110	68/18670	0.00755474	0.123063	0.110077	CCL5/EPHA2/ITGB4	3
BP	GO:1903522	regulation of blood circulation	5/62	297/18670	0.00304049	0.0498868	0.0380407	CELF2/ANK2/ADM/KCNA5/CHGA	5		BP	GO:0046323	glucose import	3/110	68/18670	0.00755474	0.123063	0.110077	HK2/GPC3/PLA2G1B	3
BP	GO:0050927	positive regulation of positive chemotaxis	2/62	25/18670	0.00309889	0.0498868	0.0380407	CXCL12/SCG2	2		BP	GO:0022410	circadian sleep/wake cycle process	2/110	23/18670	0.00802766	0.127413	0.113969	GHRL/NMU	2
BP	GO:0051953	negative regulation of amine transport	2/62	25/18670	0.00309889	0.0498868	0.0380407	SYT4/CHGA	2		BP	GO:0061436	establishment of skin barrier	2/110	23/18670	0.00802766	0.127413	0.113969	CLDN4/SFN	2
BP	GO:0006816	calcium ion transport	6/62	434/18670	0.00312344	0.0498868	0.0380407	FCRL3/CCR7/CD19/ANK2/CORO1A/CXCL12	6		BP	GO:2000050	regulation of non-canonical Wnt signaling pathway	2/110	23/18670	0.00802766	0.127413	0.113969	GPC3/SFRP4	2
BP	GO:0008217	regulation of blood pressure	4/62	182/18670	0.00313787	0.0498868	0.0380407	CMA1/ADM/ADIPOQ/CHGA	4		BP	GO:0048565	digestive tract development	4/110	134/18670	0.00815243	0.127683	0.11421	PTK6/ITGB4/SFRP5/REG1A	4
BP	GO:0070372	regulation of ERK1 and ERK2 cascade	5/62	300/18670	0.00317416	0.0499473	0.0380869	SLAMF1/CCR7/PLA2G2A/ADCYAP1/ADIPOQ	5		BP	GO:0010517	regulation of phospholipase activity	3/110	70/18670	0.00818218	0.127683	0.11421	CCL5/NTRK2/PLA2G1B	3
BP	GO:0050804	modulation of chemical synaptic transmission	6/62	436/18670	0.00319492	0.0499473	0.0380869	CBLN1/ADCYAP1/SYT4/ADIPOQ/SCGN/CNR2	6		BP	GO:0042531	positive regulation of tyrosine phosphorylation of STAT protein	3/110	71/18670	0.00850706	0.131647	0.117756	FLT3/CCL5/PTK6	3
BP	GO:0099177	regulation of trans-synaptic signaling	6/62	437/18670	0.00323112	0.0500958	0.0382001	CBLN1/ADCYAP1/SYT4/ADIPOQ/SCGN/CNR2	6		BP	GO:0045606	positive regulation of epidermal cell differentiation	2/110	24/18670	0.00872398	0.132111	0.118171	SFN/SFRP4	2
BP	GO:0019932	second-messenger-mediated signaling	6/62	439/18670	0.00330445	0.0506818	0.038647	CCR7/ANK2/ADM/ADCYAP1/NEUROD1/CHGA	6		BP	GO:0071677	positive regulation of mononuclear cell migration	2/110	24/18670	0.00872398	0.132111	0.118171	CCL5/S100A14	2
BP	GO:0015844	monoamine transport	3/62	90/18670	0.00333626	0.0506818	0.038647	CXCL12/SYT4/CHGA	3		BP	GO:0072503	cellular divalent inorganic cation homeostasis	8/110	493/18670	0.0087505	0.132111	0.118171	CCL5/SLC39A4/GHRL/NMU/PLA2G1B/SLC30A2/IAPP/SLC30A8	8
BP	GO:0050926	regulation of positive chemotaxis	2/62	26/18670	0.00334997	0.0506818	0.038647	CXCL12/SCG2	2		BP	GO:0032024	positive regulation of insulin secretion	3/110	72/18670	0.00883943	0.132378	0.118409	GHRL/CFTR/SLC30A8	3
BP	GO:0002026	regulation of the force of heart contraction	2/62	27/18670	0.00361026	0.0536316	0.0408963	ADM/CHGA	2		BP	GO:0006720	isoprenoid metabolic process	4/110	139/18670	0.00924616	0.135409	0.121121	GPC3/SDR16C5/PNLIP/CLPS	4
BP	GO:0035883	enteroendocrine cell differentiation	2/62	27/18670	0.00361026	0.0536316	0.0408963	INSM1/NEUROD1	2		BP	GO:0060326	cell chemotaxis	6/110	304/18670	0.00925381	0.135409	0.121121	PRKCQ/CCL5/EPHA2/THBS4/S100A14/PLA2G1B	6
BP	GO:0042113	B cell activation	5/62	310/18670	0.00365051	0.0536316	0.0408963	FCRL3/CD19/SASH3/CR2/IL7R	5		BP	GO:0034110	regulation of homotypic cell-cell adhesion	2/110	25/18670	0.00944638	0.135409	0.121121	PRKCQ/CCL5	2
BP	GO:0051952	regulation of amine transport	3/62	93/18670	0.0036593	0.0536316	0.0408963	CXCL12/SYT4/CHGA	3		BP	GO:0051156	glucose 6-phosphate metabolic process	2/110	25/18670	0.00944638	0.135409	0.121121	HK2/G6PC2	2
BP	GO:0042102	positive regulation of T cell proliferation	3/62	95/18670	0.00388491	0.0564969	0.0430812	CD1D/CORO1A/SASH3	3		BP	GO:0090025	regulation of monocyte chemotaxis	2/110	25/18670	0.00944638	0.135409	0.121121	CCL5/S100A14	2
BP	GO:0070371	ERK1 and ERK2 cascade	5/62	317/18670	0.0040132	0.0579136	0.0441615	SLAMF1/CCR7/PLA2G2A/ADCYAP1/ADIPOQ	5		BP	GO:0002791	regulation of peptide secretion	8/110	500/18670	0.00947936	0.135409	0.121121	CCL5/SLC2A1/GHRL/NMU/PLA2G1B/CFTR/G6PC2/SLC30A8	8
BP	GO:0033032	regulation of myeloid cell apoptotic process	2/62	29/18670	0.0041582	0.0590968	0.0450637	APOH/ADIPOQ	2		BP	GO:0097530	granulocyte migration	4/110	141/18670	0.00970914	0.137633	0.12311	CCL5/THBS4/S100A14/PLA2G1B	4
BP	GO:0050855	regulation of B cell receptor signaling pathway	2/62	29/18670	0.0041582	0.0590968	0.0450637	FCRL3/CD19	2		BP	GO:0001707	mesoderm formation	3/110	75/18670	0.00988187	0.13902	0.124351	EPHA2/ITGB4/ITGA3	3
BP	GO:0031341	regulation of cell killing	3/62	98/18670	0.00423895	0.0597915	0.0455935	DNASE1L3/CD1D/IL7R	3		BP	GO:0006817	phosphate ion transport	2/110	26/18670	0.0101945	0.1392	0.124512	ADAMTS8/SFRP4	2
BP	GO:0042110	T cell activation	6/62	464/18670	0.00432971	0.060616	0.0462221	CCR7/TIGIT/CD1D/CORO1A/SASH3/IL7R	6		BP	GO:0033561	regulation of water loss via skin	2/110	26/18670	0.0101945	0.1392	0.124512	CLDN4/SFN	2
BP	GO:0010743	regulation of macrophage derived foam cell differentiation	2/62	30/18670	0.00444573	0.0613249	0.0467627	PLA2G2A/ADIPOQ	2		BP	GO:0042745	circadian sleep/wake cycle	2/110	26/18670	0.0101945	0.1392	0.124512	GHRL/NMU	2
BP	GO:0048873	homeostasis of number of cells within a tissue	2/62	30/18670	0.00444573	0.0613249	0.0467627	CORO1A/SASH3	2		BP	GO:0071624	positive regulation of granulocyte chemotaxis	2/110	26/18670	0.0101945	0.1392	0.124512	THBS4/S100A14	2
BP	GO:0015837	amine transport	3/62	100/18670	0.00448552	0.0614222	0.0468369	CXCL12/SYT4/CHGA	3		BP	GO:0048332	mesoderm morphogenesis	3/110	77/18670	0.0106149	0.143883	0.1287	EPHA2/ITGB4/ITGA3	3
BP	GO:0002027	regulation of heart rate	3/62	101/18670	0.00461201	0.0622044	0.0474334	ANK2/ADM/KCNA5	3		BP	GO:0007160	cell-matrix adhesion	5/110	225/18670	0.0107088	0.144103	0.128897	ITGB4/ITGA3/MSLN/COL17A1/MUC4	5
BP	GO:0050708	regulation of protein secretion	6/62	472/18670	0.00470285	0.0622044	0.0474334	CCR7/KCNA5/SYT4/NEUROD1/CHGA/ABCC8	6		BP	GO:0055123	digestive system development	4/110	146/18670	0.0109319	0.145484	0.130132	PTK6/ITGB4/SFRP5/REG1A	4
BP	GO:0010522	regulation of calcium ion transport into cytosol	3/62	102/18670	0.00474063	0.0622044	0.0474334	CD19/ANK2/CORO1A	3		BP	GO:0060259	regulation of feeding behavior	2/110	27/18670	0.0109681	0.145484	0.130132	GHRL/NMU	2
BP	GO:0031338	regulation of vesicle fusion	2/62	31/18670	0.00474221	0.0622044	0.0474334	CORO1A/SYT4	2		BP	GO:0035116	embryonic hindlimb morphogenesis	2/110	28/18670	0.0117667	0.15497	0.138618	GPC3/PITX1	2
BP	GO:1902230	negative regulation of intrinsic apoptotic signaling pathway in response to DNA damage	2/62	31/18670	0.00474221	0.0622044	0.0474334	CLU/CXCL12	2		BP	GO:0022617	extracellular matrix disassembly	3/110	81/18670	0.0121735	0.159198	0.1424	CTRB2/PRSS2/PRSS1	3
BP	GO:0002703	regulation of leukocyte mediated immunity	4/62	205/18670	0.00479119	0.0622044	0.0474334	DNASE1L3/CD1D/SASH3/IL7R	4		BP	GO:0001678	cellular glucose homeostasis	4/110	152/18670	0.0125253	0.161241	0.144227	HK2/GHRL/GJB6/CFTR	4
BP	GO:0050769	positive regulation of neurogenesis	6/62	474/18670	0.00479974	0.0622044	0.0474334	NAP1L2/NGFR/CXCL12/ADCYAP1/SYT4/NEUROD1	6		BP	GO:0048240	sperm capacitation	2/110	29/18670	0.0125902	0.161241	0.144227	CFTR/SPINK1	2
BP	GO:0019233	sensory perception of pain	3/62	104/18670	0.00500437	0.0622044	0.0474334	CXCL12/ADCYAP1/CNR2	3		BP	GO:0070229	negative regulation of lymphocyte apoptotic process	2/110	29/18670	0.0125902	0.161241	0.144227	PRKCQ/CCL5	2
BP	GO:0071887	leukocyte apoptotic process	3/62	104/18670	0.00500437	0.0622044	0.0474334	CCR7/IL7R/CXCL12	3		BP	GO:0052548	regulation of endopeptidase activity	7/110	425/18670	0.0129201	0.163107	0.145897	AQP1/SERPINB5/SFN/EGLN3/SERPINI2/SERPINA6/SPINK1	7
BP	GO:0050670	regulation of lymphocyte proliferation	4/62	208/18670	0.00504275	0.0622044	0.0474334	FCRL3/CD1D/CORO1A/SASH3	4		BP	GO:0006970	response to osmotic stress	3/110	83/18670	0.0129994	0.163107	0.145897	SLC2A1/AQP1/SST	3
BP	GO:0043552	positive regulation of phosphatidylinositol 3-kinase activity	2/62	32/18670	0.00504759	0.0622044	0.0474334	CCR7/CD19	2		BP	GO:0042509	regulation of tyrosine phosphorylation of STAT protein	3/110	83/18670	0.0129994	0.163107	0.145897	FLT3/CCL5/PTK6	3
BP	GO:0071353	cellular response to interleukin-4	2/62	32/18670	0.00504759	0.0622044	0.0474334	IL24/CORO1A	2		BP	GO:0051047	positive regulation of secretion	7/110	428/18670	0.0133852	0.166821	0.149218	AQP1/VIP/GHRL/NMU/PLA2G1B/CFTR/SLC30A8	7
BP	GO:0086019	cell-cell signaling involved in cardiac conduction	2/62	32/18670	0.00504759	0.0622044	0.0474334	ANK2/KCNA5	2		BP	GO:0030856	regulation of epithelial cell differentiation	4/110	156/18670	0.013666	0.169185	0.151333	SFN/REG3A/SFRP4/REG3G	4
BP	GO:0099623	regulation of cardiac muscle cell membrane repolarization	2/62	32/18670	0.00504759	0.0622044	0.0474334	ANK2/KCNA5	2		BP	GO:0030509	BMP signaling pathway	4/110	157/18670	0.0139611	0.170345	0.152371	GPC3/ITGA3/SFRP4/SFRP5	4
BP	GO:0070838	divalent metal ion transport	6/62	479/18670	0.00504843	0.0622044	0.0474334	FCRL3/CCR7/CD19/ANK2/CORO1A/CXCL12	6		BP	GO:0042593	glucose homeostasis	5/110	241/18670	0.0140721	0.170345	0.152371	HK2/GHRL/GJB6/CFTR/G6PC2	5
BP	GO:0032944	regulation of mononuclear cell proliferation	4/62	209/18670	0.00512854	0.0622044	0.0474334	FCRL3/CD1D/CORO1A/SASH3	4		BP	GO:0007260	tyrosine phosphorylation of STAT protein	3/110	86/18670	0.0142971	0.170345	0.152371	FLT3/CCL5/PTK6	3
BP	GO:0007009	plasma membrane organization	3/62	105/18670	0.00513949	0.0622044	0.0474334	CLU/ANK2/SH3GL2	3		BP	GO:0033500	carbohydrate homeostasis	5/110	242/18670	0.0143034	0.170345	0.152371	HK2/GHRL/GJB6/CFTR/G6PC2	5
BP	GO:0043266	regulation of potassium ion transport	3/62	105/18670	0.00513949	0.0622044	0.0474334	ANK2/ADCYAP1/KCNA5	3		BP	GO:0006658	phosphatidylserine metabolic process	2/110	31/18670	0.0143101	0.170345	0.152371	SERINC2/PLA2G1B	2
BP	GO:0097529	myeloid leukocyte migration	4/62	210/18670	0.00521531	0.0627174	0.0478246	CCR7/CXCL12/SCG2/CHGA	4		BP	GO:0030431	sleep	2/110	31/18670	0.0143101	0.170345	0.152371	GHRL/NMU	2
BP	GO:0002456	T cell mediated immunity	3/62	106/18670	0.0052768	0.0628672	0.0479388	CD1D/SASH3/IL7R	3		BP	GO:0002690	positive regulation of leukocyte chemotaxis	3/110	87/18670	0.0147454	0.172544	0.154337	CCL5/THBS4/S100A14	3
BP	GO:0001914	regulation of T cell mediated cytotoxicity	2/62	33/18670	0.00536181	0.0628672	0.0479388	CD1D/IL7R	2		BP	GO:0014068	positive regulation of phosphatidylinositol 3-kinase signaling	3/110	87/18670	0.0147454	0.172544	0.154337	FLT3/CCL5/NTRK2	3
BP	GO:0033028	myeloid cell apoptotic process	2/62	33/18670	0.00536181	0.0628672	0.0479388	APOH/ADIPOQ	2		BP	GO:0051896	regulation of protein kinase B signaling	5/110	244/18670	0.0147735	0.172544	0.154337	NTRK2/EPHA2/MST1R/IAPP/SFRP5	5
BP	GO:0048011	neurotrophin TRK receptor signaling pathway	2/62	33/18670	0.00536181	0.0628672	0.0479388	CYFIP2/NGFR	2		BP	GO:1902476	chloride transmembrane transport	3/110	88/18670	0.0152016	0.174306	0.155914	CLIC3/CLDN4/CFTR	3
BP	GO:0072511	divalent inorganic cation transport	6/62	486/18670	0.00541239	0.0630662	0.0480905	FCRL3/CCR7/CD19/ANK2/CORO1A/CXCL12	6		BP	GO:0038128	ERBB2 signaling pathway	2/110	32/18670	0.015206	0.174306	0.155914	GRB7/PTK6	2
BP	GO:0002526	acute inflammatory response	3/62	108/18670	0.00555802	0.0643633	0.0490796	DNASE1L3/CCR7/ADCYAP1	3		BP	GO:0045987	positive regulation of smooth muscle contraction	2/110	32/18670	0.015206	0.174306	0.155914	GHRL/NMU	2
BP	GO:0070374	positive regulation of ERK1 and ERK2 cascade	4/62	215/18670	0.00566395	0.0650286	0.0495869	SLAMF1/CCR7/PLA2G2A/ADCYAP1	4		BP	GO:0046427	positive regulation of receptor signaling pathway via JAK-STAT	3/110	89/18670	0.0156658	0.178475	0.159642	FLT3/CCL5/PTK6	3
BP	GO:0070670	response to interleukin-4	2/62	34/18670	0.0056848	0.0650286	0.0495869	IL24/CORO1A	2		BP	GO:0035774	positive regulation of insulin secretion involved in cellular response to glucose stimulus	2/110	33/18670	0.0161255	0.181485	0.162335	GHRL/CFTR	2
BP	GO:0072676	lymphocyte migration	3/62	111/18670	0.00599648	0.0674572	0.0514388	MADCAM1/CCR7/CXCL12	3		BP	GO:0070232	regulation of T cell apoptotic process	2/110	33/18670	0.0161255	0.181485	0.162335	PRKCQ/CCL5	2
BP	GO:0032735	positive regulation of interleukin-12 production	2/62	35/18670	0.00601651	0.0674572	0.0514388	CCR7/LTB	2		BP	GO:1904894	positive regulation of receptor signaling pathway via STAT	3/110	92/18670	0.0171059	0.191359	0.171167	FLT3/CCL5/PTK6	3
BP	GO:0051954	positive regulation of amine transport	2/62	35/18670	0.00601651	0.0674572	0.0514388	CXCL12/SYT4	2		BP	GO:0048333	mesodermal cell differentiation	2/110	35/18670	0.0180338	0.199662	0.178594	ITGB4/ITGA3	2
BP	GO:0051651	maintenance of location in cell	4/62	219/18670	0.00604094	0.0674572	0.0514388	CCR7/CD19/ANK2/CORO1A	4		BP	GO:0071772	response to BMP	4/110	170/18670	0.0181706	0.199662	0.178594	GPC3/ITGA3/SFRP4/SFRP5	4
BP	GO:0001938	positive regulation of endothelial cell proliferation	3/62	112/18670	0.00614711	0.0682366	0.0520332	PPP1R16B/CXCL12/SCG2	3		BP	GO:0071773	cellular response to BMP stimulus	4/110	170/18670	0.0181706	0.199662	0.178594	GPC3/ITGA3/SFRP4/SFRP5	4
BP	GO:0070663	regulation of leukocyte proliferation	4/62	222/18670	0.00633443	0.0685374	0.0522625	FCRL3/CD1D/CORO1A/SASH3	4		BP	GO:0035137	hindlimb morphogenesis	2/110	36/18670	0.019022	0.207788	0.185862	GPC3/PITX1	2
BP	GO:0010742	macrophage derived foam cell differentiation	2/62	36/18670	0.00635688	0.0685374	0.0522625	PLA2G2A/ADIPOQ	2		BP	GO:0001666	response to hypoxia	6/110	359/18670	0.0195583	0.21184	0.189487	PLEKHN1/SLC2A1/HK2/AQP1/EGLN3/REG1A	6
BP	GO:0032733	positive regulation of interleukin-10 production	2/62	36/18670	0.00635688	0.0685374	0.0522625	TIGIT/SASH3	2		BP	GO:0051591	response to cAMP	3/110	97/18670	0.0196656	0.21184	0.189487	AQP1/AQP8/CFTR	3
BP	GO:0090077	foam cell differentiation	2/62	36/18670	0.00635688	0.0685374	0.0522625	PLA2G2A/ADIPOQ	2		BP	GO:0051346	negative regulation of hydrolase activity	7/110	463/18670	0.0197353	0.21184	0.189487	AQP1/GPC3/SERPINB5/SFN/SERPINI2/SERPINA6/SPINK1	7
BP	GO:0090218	positive regulation of lipid kinase activity	2/62	36/18670	0.00635688	0.0685374	0.0522625	CCR7/CD19	2		BP	GO:0032941	secretion by tissue	2/110	37/18670	0.0200326	0.213797	0.191237	AQP1/CEL	2
BP	GO:0030449	regulation of complement activation	3/62	115/18670	0.00661253	0.0708864	0.0540537	CLU/CD19/CR2	3		BP	GO:0030301	cholesterol transport	3/110	99/18670	0.0207455	0.219659	0.196481	PNLIP/CEL/CFTR	3
BP	GO:2000403	positive regulation of lymphocyte migration	2/62	37/18670	0.00670584	0.0714782	0.054505	MADCAM1/CXCL12	2		BP	GO:0032094	response to food	2/110	38/18670	0.0210653	0.219659	0.196481	GHRL/CLPS	2
BP	GO:0043666	regulation of phosphoprotein phosphatase activity	3/62	117/18670	0.00693418	0.0734945	0.0560426	FCRL3/PPP1R16B/PPP1R1A	3		BP	GO:0050892	intestinal absorption	2/110	38/18670	0.0210653	0.219659	0.196481	PNLIP/CEL	2
BP	GO:0086091	regulation of heart rate by cardiac conduction	2/62	38/18670	0.00706334	0.0744429	0.0567657	ANK2/KCNA5	2		BP	GO:0050714	positive regulation of protein secretion	5/110	268/18670	0.0212419	0.219659	0.196481	GHRL/NMU/PLA2G1B/CFTR/SLC30A8	5
BP	GO:0060306	regulation of membrane repolarization	2/62	39/18670	0.00742933	0.0774301	0.0590436	ANK2/KCNA5	2		BP	GO:0055074	calcium ion homeostasis	7/110	471/18670	0.0214406	0.219659	0.196481	CCL5/GHRL/S100A14/NMU/PLA2G1B/IAPP/REG1A	7
BP	GO:1902229	regulation of intrinsic apoptotic signaling pathway in response to DNA damage	2/62	39/18670	0.00742933	0.0774301	0.0590436	CLU/CXCL12	2		BP	GO:0048736	appendage development	4/110	179/18670	0.0215017	0.219659	0.196481	TFAP2A/ITGB4/GPC3/PITX1	4
BP	GO:0042445	hormone metabolic process	4/62	233/18670	0.00749151	0.0776468	0.0592088	CMA1/ADM/PCSK1/PCSK2	4		BP	GO:0060173	limb development	4/110	179/18670	0.0215017	0.219659	0.196481	TFAP2A/ITGB4/GPC3/PITX1	4
BP	GO:0048588	developmental cell growth	4/62	234/18670	0.00760314	0.0782877	0.0596976	CYFIP2/CXCL12/SYT4/SH3GL2	4		BP	GO:0050830	defense response to Gram-positive bacterium	3/110	101/18670	0.0218575	0.219659	0.196481	EPHA2/PLA2G1B/REG3G	3
BP	GO:0060560	developmental growth involved in morphogenesis	4/62	235/18670	0.00771587	0.0782877	0.0596976	CYFIP2/CXCL12/SYT4/SH3GL2	4		BP	GO:1901890	positive regulation of cell junction assembly	3/110	101/18670	0.0218575	0.219659	0.196481	NTRK2/EPHA2/GHRL	3
BP	GO:0019730	antimicrobial humoral response	3/62	122/18670	0.00777857	0.0782877	0.0596976	CLU/PLA2G2A/CHGA	3		BP	GO:0045684	positive regulation of epidermis development	2/110	39/18670	0.0221197	0.219659	0.196481	SFN/SFRP4	2
BP	GO:0014046	dopamine secretion	2/62	40/18670	0.00780373	0.0782877	0.0596976	CXCL12/SYT4	2		BP	GO:0051180	vitamin transport	2/110	39/18670	0.0221197	0.219659	0.196481	SLC2A1/GC	2
BP	GO:0014059	regulation of dopamine secretion	2/62	40/18670	0.00780373	0.0782877	0.0596976	CXCL12/SYT4	2		BP	GO:0051930	regulation of sensory perception of pain	2/110	39/18670	0.0221197	0.219659	0.196481	VIP/NMU	2
BP	GO:0045823	positive regulation of heart contraction	2/62	40/18670	0.00780373	0.0782877	0.0596976	ADM/CHGA	2		BP	GO:0072595	maintenance of protein localization in organelle	2/110	39/18670	0.0221197	0.219659	0.196481	HK2/PDIA2	2
BP	GO:0051928	positive regulation of calcium ion transport	3/62	123/18670	0.00795441	0.0793748	0.0605265	CD19/ANK2/CXCL12	3		BP	GO:0036293	response to decreased oxygen levels	6/110	370/18670	0.0222981	0.220253	0.197012	PLEKHN1/SLC2A1/HK2/AQP1/EGLN3/REG1A	6
BP	GO:0030890	positive regulation of B cell proliferation	2/62	41/18670	0.0081865	0.0808309	0.0616368	FCRL3/SASH3	2		BP	GO:0044264	cellular polysaccharide metabolic process	3/110	103/18670	0.0230015	0.22552	0.201723	AOAH/B3GNT3/PHLDA2	3
BP	GO:0090279	regulation of calcium ion import	2/62	41/18670	0.0081865	0.0808309	0.0616368	FCRL3/CXCL12	2		BP	GO:0051931	regulation of sensory perception	2/110	40/18670	0.0231956	0.22552	0.201723	VIP/NMU	2
BP	GO:0006813	potassium ion transport	4/62	240/18670	0.00829609	0.0810597	0.0618113	ANK2/ADCYAP1/KCNA5/ABCC8	4		BP	GO:0071470	cellular response to osmotic stress	2/110	40/18670	0.0231956	0.22552	0.201723	SLC2A1/AQP1	2
BP	GO:0030217	T cell differentiation	4/62	240/18670	0.00829609	0.0810597	0.0618113	CCR7/CD1D/SASH3/IL7R	4		BP	GO:0019233	sensory perception of pain	3/110	104/18670	0.0235856	0.226935	0.202989	VIP/NMU/IAPP	3
BP	GO:0050678	regulation of epithelial cell proliferation	5/62	378/18670	0.00834102	0.0810765	0.0618241	PPP1R16B/NGFR/CXCL12/APOH/SCG2	5		BP	GO:0030593	neutrophil chemotaxis	3/110	104/18670	0.0235856	0.226935	0.202989	CCL5/THBS4/PLA2G1B	3
BP	GO:0042593	glucose homeostasis	4/62	241/18670	0.00841548	0.0813785	0.0620544	CMA1/NGFR/ADIPOQ/NEUROD1	4		BP	GO:0045616	regulation of keratinocyte differentiation	2/110	41/18670	0.0242927	0.232534	0.207997	REG3A/REG3G	2
BP	GO:0033500	carbohydrate homeostasis	4/62	242/18670	0.00853599	0.0820996	0.0626043	CMA1/NGFR/ADIPOQ/NEUROD1	4		BP	GO:1905475	regulation of protein localization to membrane	4/110	187/18670	0.0247576	0.235768	0.21089	EPHA2/GPC3/ITGA3/SFN	4
BP	GO:0099622	cardiac muscle cell membrane repolarization	2/62	42/18670	0.00857757	0.0820996	0.0626043	ANK2/KCNA5	2		BP	GO:0006575	cellular modified amino acid metabolic process	4/110	188/18670	0.0251844	0.238322	0.213174	SERINC2/PLA2G1B/GATM/GSTA2	4
BP	GO:0035270	endocrine system development	3/62	127/18670	0.00868121	0.0826698	0.0630391	ADCYAP1/INSM1/NEUROD1	3		BP	GO:0006654	phosphatidic acid biosynthetic process	2/110	42/18670	0.0254107	0.238322	0.213174	LIPH/PLA2G1B	2
BP	GO:0031346	positive regulation of cell projection organization	5/62	383/18670	0.00879933	0.0827756	0.0631197	CCR7/NGFR/CXCL12/ADCYAP1/SYT4	5		BP	GO:0015701	bicarbonate transport	2/110	42/18670	0.0254107	0.238322	0.213174	AQP1/CFTR	2
BP	GO:0045765	regulation of angiogenesis	5/62	383/18670	0.00879933	0.0827756	0.0631197	PPP1R16B/CMA1/NGFR/ADM/APOH	5		BP	GO:0044262	cellular carbohydrate metabolic process	5/110	282/18670	0.0257554	0.238893	0.213685	SLC2A1/AOAH/HK2/B3GNT3/PHLDA2	5
BP	GO:0002576	platelet degranulation	3/62	128/18670	0.00886881	0.0827756	0.0631197	CLU/APOH/SCG3	3		BP	GO:0031346	positive regulation of cell projection organization	6/110	383/18670	0.0258575	0.238893	0.213685	NTRK2/PTK6/EPS8L1/ITGA3/PLEK2/REG1A	6
BP	GO:0002687	positive regulation of leukocyte migration	3/62	128/18670	0.00886881	0.0827756	0.0631197	MADCAM1/CCR7/CXCL12	3		BP	GO:0045765	regulation of angiogenesis	6/110	383/18670	0.0258575	0.238893	0.213685	HK2/AQP1/EPHA2/GHRL/THBS4/C6	6
BP	GO:0035307	positive regulation of protein dephosphorylation	2/62	44/18670	0.0093844	0.0867248	0.0661312	FCRL3/PPP1R16B	2		BP	GO:0006821	chloride transport	3/110	108/18670	0.026002	0.239038	0.213815	CLIC3/CLDN4/CFTR	3
BP	GO:0051489	regulation of filopodium assembly	2/62	44/18670	0.0093844	0.0867248	0.0661312	CCR7/PPP1R16B	2		BP	GO:0001935	endothelial cell proliferation	4/110	191/18670	0.0264914	0.240498	0.215121	EPHA2/VIP/GHRL/THBS4	4
BP	GO:0030183	B cell differentiation	3/62	131/18670	0.00944585	0.0868648	0.066238	FCRL3/CD19/CR2	3		BP	GO:0046473	phosphatidic acid metabolic process	2/110	43/18670	0.0265493	0.240498	0.215121	LIPH/PLA2G1B	2
BP	GO:0031018	endocrine pancreas development	2/62	45/18670	0.00980005	0.0896335	0.0683492	INSM1/NEUROD1	2		BP	GO:0051602	response to electrical stimulus	2/110	43/18670	0.0265493	0.240498	0.215121	GHRL/GJB6	2
BP	GO:0001508	action potential	3/62	133/18670	0.00984249	0.0896335	0.0683492	ANK2/KCNA5/CNR2	3		BP	GO:0007565	female pregnancy	4/110	192/18670	0.026936	0.241643	0.216146	SLC2A1/ITGA3/CLDN4/GHRL	4
BP	GO:0002067	glandular epithelial cell differentiation	2/62	46/18670	0.0102238	0.0911214	0.0694838	INSM1/NEUROD1	2		BP	GO:1901136	carbohydrate derivative catabolic process	4/110	192/18670	0.026936	0.241643	0.216146	AOAH/GPC3/PNLIPRP2/APOBEC2	4
BP	GO:0002437	inflammatory response to antigenic stimulus	2/62	46/18670	0.0102238	0.0911214	0.0694838	CCR7/ADCYAP1	2		BP	GO:0015711	organic anion transport	7/110	495/18670	0.0271687	0.242194	0.216638	SLC16A3/SLC2A1/NTRK2/AQP1/SLCO4A1/PLA2G1B/CFTR	7
BP	GO:1903587	regulation of blood vessel endothelial cell proliferation involved in sprouting angiogenesis	2/62	46/18670	0.0102238	0.0911214	0.0694838	PPP1R16B/NGFR	2		BP	GO:0046916	cellular transition metal ion homeostasis	3/110	110/18670	0.0272582	0.242194	0.216638	SLC39A4/SLC30A2/SLC30A8	3
BP	GO:1904036	negative regulation of epithelial cell apoptotic process	2/62	46/18670	0.0102238	0.0911214	0.0694838	SCG2/NEUROD1	2		BP	GO:0005996	monosaccharide metabolic process	5/110	287/18670	0.0275055	0.243227	0.217562	SLC2A1/HK2/GHRL/PHLDA2/G6PC2	5
BP	GO:0050921	positive regulation of chemotaxis	3/62	135/18670	0.0102487	0.0911214	0.0694838	CCR7/CXCL12/SCG2	3		BP	GO:0002793	positive regulation of peptide secretion	5/110	288/18670	0.0278644	0.245233	0.219357	GHRL/NMU/PLA2G1B/CFTR/SLC30A8	5
BP	GO:0007187	G protein-coupled receptor signaling pathway, coupled to cyclic nucleotide second messenger	4/62	256/18670	0.0103435	0.0915305	0.0697957	ADM/ADCYAP1/CHGA/CNR2	4		BP	GO:0050900	leukocyte migration	7/110	499/18670	0.0282159	0.247155	0.221076	SLC16A3/CCL5/GRB7/ITGA3/THBS4/S100A14/PLA2G1B	7
BP	GO:0045058	T cell selection	2/62	47/18670	0.0106555	0.0938486	0.0715634	CCR7/CD1D	2		BP	GO:0001938	positive regulation of endothelial cell proliferation	3/110	112/18670	0.0285465	0.247714	0.221576	VIP/GHRL/THBS4	3
BP	GO:0007189	adenylate cyclase-activating G protein-coupled receptor signaling pathway	3/62	139/18670	0.0110902	0.09592	0.0731429	ADM/ADCYAP1/CHGA	3		BP	GO:0015918	sterol transport	3/110	112/18670	0.0285465	0.247714	0.221576	PNLIP/CEL/CFTR	3
BP	GO:0035304	regulation of protein dephosphorylation	3/62	139/18670	0.0110902	0.09592	0.0731429	FCRL3/PPP1R16B/PPP1R1A	3		BP	GO:0098656	anion transmembrane transport	5/110	291/18670	0.028959	0.250105	0.223715	SLC16A3/CLIC3/CLDN4/ADAMTS8/CFTR	5
BP	GO:0002711	positive regulation of T cell mediated immunity	2/62	48/18670	0.0110952	0.09592	0.0731429	CD1D/SASH3	2		BP	GO:0070482	response to oxygen levels	6/110	394/18670	0.0291511	0.250105	0.223715	PLEKHN1/SLC2A1/HK2/AQP1/EGLN3/REG1A	6
BP	GO:1903727	positive regulation of phospholipid metabolic process	2/62	48/18670	0.0110952	0.09592	0.0731429	CCR7/CD19	2		BP	GO:0009749	response to glucose	4/110	197/18670	0.0292261	0.250105	0.223715	GHRL/GJB6/CFTR/SLC30A8	4
BP	GO:0060048	cardiac muscle contraction	3/62	140/18670	0.0113066	0.0972993	0.0741947	ANK2/KCNA5/CHGA	3		BP	GO:0002688	regulation of leukocyte chemotaxis	3/110	114/18670	0.0298666	0.250538	0.224102	CCL5/THBS4/S100A14	3
BP	GO:0001913	T cell mediated cytotoxicity	2/62	49/18670	0.0115428	0.0979835	0.0747164	CD1D/IL7R	2		BP	GO:0005976	polysaccharide metabolic process	3/110	114/18670	0.0298666	0.250538	0.224102	AOAH/B3GNT3/PHLDA2	3
BP	GO:0071825	protein-lipid complex subunit organization	2/62	49/18670	0.0115428	0.0979835	0.0747164	PLA2G2A/SH3GL2	2		BP	GO:0030282	bone mineralization	3/110	114/18670	0.0298666	0.250538	0.224102	TFAP2A/GPC3/MGP	3
BP	GO:1990090	cellular response to nerve growth factor stimulus	2/62	49/18670	0.0115428	0.0979835	0.0747164	CORO1A/SH3GL2	2		BP	GO:0033628	regulation of cell adhesion mediated by integrin	2/110	46/18670	0.0300862	0.250538	0.224102	CCL5/EPHA2	2
BP	GO:0008277	regulation of G protein-coupled receptor signaling pathway	3/62	142/18670	0.0117468	0.099266	0.0756943	ADM/ADCYAP1/CHGA	3		BP	GO:0048512	circadian behavior	2/110	46/18670	0.0300862	0.250538	0.224102	GHRL/NMU	2
BP	GO:0014009	glial cell proliferation	2/62	50/18670	0.0119983	0.100486	0.0766245	CLU/ADCYAP1	2		BP	GO:0071675	regulation of mononuclear cell migration	2/110	46/18670	0.0300862	0.250538	0.224102	CCL5/S100A14	2
BP	GO:0086009	membrane repolarization	2/62	50/18670	0.0119983	0.100486	0.0766245	ANK2/KCNA5	2		BP	GO:0006953	acute-phase response	2/110	47/18670	0.0313046	0.256091	0.229069	REG3A/REG3G	2
BP	GO:0002822	regulation of adaptive immune response based on somatic recombination of immune receptors built from immunoglobulin superfamily domains	3/62	145/18670	0.0124255	0.103442	0.0788788	CD1D/SASH3/IL7R	3		BP	GO:0007622	rhythmic behavior	2/110	47/18670	0.0313046	0.256091	0.229069	GHRL/NMU	2
BP	GO:0097366	response to bronchodilator	2/62	51/18670	0.0124616	0.103442	0.0788788	CCR7/CNR2	2		BP	GO:0070231	T cell apoptotic process	2/110	47/18670	0.0313046	0.256091	0.229069	PRKCQ/CCL5	2
BP	GO:0051384	response to glucocorticoid	3/62	146/18670	0.0126566	0.103993	0.0792987	ADM/ADCYAP1/ADIPOQ	3		BP	GO:2000107	negative regulation of leukocyte apoptotic process	2/110	47/18670	0.0313046	0.256091	0.229069	PRKCQ/CCL5	2
BP	GO:1904892	regulation of receptor signaling pathway via STAT	3/62	146/18670	0.0126566	0.103993	0.0792987	IL24/IL7R/NEUROD1	3		BP	GO:0009746	response to hexose	4/110	202/18670	0.0316286	0.257607	0.230425	GHRL/GJB6/CFTR/SLC30A8	4
BP	GO:1902105	regulation of leukocyte differentiation	4/62	272/18670	0.0126942	0.103993	0.0792987	FCRL3/SASH3/IL7R/ADIPOQ	4		BP	GO:1903532	positive regulation of secretion by cell	6/110	403/18670	0.0320434	0.257778	0.230578	VIP/GHRL/NMU/PLA2G1B/CFTR/SLC30A8	6
BP	GO:0015872	dopamine transport	2/62	52/18670	0.0129326	0.104576	0.0797431	CXCL12/SYT4	2		BP	GO:0009311	oligosaccharide metabolic process	2/110	48/18670	0.0325422	0.257778	0.230578	SLC2A1/FUT3	2
BP	GO:0032653	regulation of interleukin-10 production	2/62	52/18670	0.0129326	0.104576	0.0797431	TIGIT/SASH3	2		BP	GO:0045933	positive regulation of muscle contraction	2/110	48/18670	0.0325422	0.257778	0.230578	GHRL/NMU	2
BP	GO:1990089	response to nerve growth factor	2/62	52/18670	0.0129326	0.104576	0.0797431	CORO1A/SH3GL2	2		BP	GO:0048593	camera-type eye morphogenesis	3/110	118/18670	0.0326024	0.257778	0.230578	TFAP2A/NTRK2/EPHA2	3
BP	GO:1901342	regulation of vasculature development	5/62	422/18670	0.0129887	0.104579	0.0797455	PPP1R16B/CMA1/NGFR/ADM/APOH	5		BP	GO:1990266	neutrophil migration	3/110	118/18670	0.0326024	0.257778	0.230578	CCL5/THBS4/PLA2G1B	3
BP	GO:0043270	positive regulation of ion transport	4/62	275/18670	0.01317	0.105585	0.0805128	CD19/ANK2/CXCL12/SYT4	4		BP	GO:0006006	glucose metabolic process	4/110	204/18670	0.0326213	0.257778	0.230578	HK2/GHRL/PHLDA2/G6PC2	4
BP	GO:0002706	regulation of lymphocyte mediated immunity	3/62	149/18670	0.0133648	0.106158	0.0809502	CD1D/SASH3/IL7R	3		BP	GO:0045766	positive regulation of angiogenesis	4/110	204/18670	0.0326213	0.257778	0.230578	HK2/AQP1/GHRL/C6	4
BP	GO:0002043	blood vessel endothelial cell proliferation involved in sprouting angiogenesis	2/62	53/18670	0.0134113	0.106158	0.0809502	PPP1R16B/NGFR	2		BP	GO:0007173	epidermal growth factor receptor signaling pathway	3/110	119/18670	0.0333061	0.262074	0.23442	GRB7/PTK6/FAM83A	3
BP	GO:0031638	zymogen activation	2/62	53/18670	0.0134113	0.106158	0.0809502	CYFIP2/APOH	2		BP	GO:0030857	negative regulation of epithelial cell differentiation	2/110	49/18670	0.0337989	0.264829	0.236885	REG3A/REG3G	2
BP	GO:0001678	cellular glucose homeostasis	3/62	152/18670	0.0140953	0.110639	0.0843667	CMA1/NGFR/NEUROD1	3		BP	GO:0003014	renal system process	3/110	120/18670	0.0340178	0.265298	0.237304	AQP1/ITGA3/CLDN4	3
BP	GO:1903169	regulation of calcium ion transmembrane transport	3/62	152/18670	0.0140953	0.110639	0.0843667	CD19/ANK2/CORO1A	3		BP	GO:0034284	response to monosaccharide	4/110	207/18670	0.0341444	0.265298	0.237304	GHRL/GJB6/CFTR/SLC30A8	4
BP	GO:0010976	positive regulation of neuron projection development	4/62	281/18670	0.0141554	0.110648	0.0843736	NGFR/CXCL12/ADCYAP1/SYT4	4		BP	GO:0007623	circadian rhythm	4/110	208/18670	0.0346612	0.267078	0.238896	NTRK2/CLDN4/GHRL/NMU	4
BP	GO:0032613	interleukin-10 production	2/62	55/18670	0.0143915	0.111105	0.084722	TIGIT/SASH3	2		BP	GO:0016051	carbohydrate biosynthetic process	4/110	208/18670	0.0346612	0.267078	0.238896	SLC2A1/B3GNT3/FUT3/G6PC2	4
BP	GO:0043551	regulation of phosphatidylinositol 3-kinase activity	2/62	55/18670	0.0143915	0.111105	0.084722	CCR7/CD19	2		BP	GO:1905477	positive regulation of protein localization to membrane	3/110	122/18670	0.0354647	0.27214	0.243425	EPHA2/ITGA3/SFN	3
BP	GO:0098900	regulation of action potential	2/62	55/18670	0.0143915	0.111105	0.084722	ANK2/CNR2	2		BP	GO:0097529	myeloid leukocyte migration	4/110	210/18670	0.0357084	0.272883	0.244089	CCL5/THBS4/S100A14/PLA2G1B	4
BP	GO:0042391	regulation of membrane potential	5/62	434/18670	0.0145103	0.111108	0.0847241	CBLN1/ANK2/ADCYAP1/KCNA5/CNR2	5		BP	GO:0048146	positive regulation of fibroblast proliferation	2/110	51/18670	0.0363682	0.276786	0.24758	AQP1/PLA2G1B	2
BP	GO:0050673	epithelial cell proliferation	5/62	434/18670	0.0145103	0.111108	0.0847241	PPP1R16B/NGFR/CXCL12/APOH/SCG2	5		BP	GO:0000041	transition metal ion transport	3/110	124/18670	0.0369431	0.278875	0.249449	SLC39A4/SLC30A2/SLC30A8	3
BP	GO:0086002	cardiac muscle cell action potential involved in contraction	2/62	56/18670	0.014893	0.113114	0.0862541	ANK2/KCNA5	2		BP	GO:0014066	regulation of phosphatidylinositol 3-kinase signaling	3/110	124/18670	0.0369431	0.278875	0.249449	FLT3/CCL5/NTRK2	3
BP	GO:0086065	cell communication involved in cardiac conduction	2/62	56/18670	0.014893	0.113114	0.0862541	ANK2/KCNA5	2		BP	GO:1902373	negative regulation of mRNA catabolic process	2/110	52/18670	0.0376803	0.281116	0.251453	PKP3/VIP	2
BP	GO:0002440	production of molecular mediator of immune response	4/62	286/18670	0.0150116	0.113555	0.0865904	FCRL3/SASH3/IL7R/CHGA	4		BP	GO:0030326	embryonic limb morphogenesis	3/110	125/18670	0.037694	0.281116	0.251453	TFAP2A/GPC3/PITX1	3
BP	GO:0042129	regulation of T cell proliferation	3/62	156/18670	0.015104	0.113796	0.0867739	CD1D/CORO1A/SASH3	3		BP	GO:0035113	embryonic appendage morphogenesis	3/110	125/18670	0.037694	0.281116	0.251453	TFAP2A/GPC3/PITX1	3
BP	GO:0019229	regulation of vasoconstriction	2/62	58/18670	0.0159182	0.118502	0.0903626	ADM/KCNA5	2		BP	GO:1901342	regulation of vasculature development	6/110	422/18670	0.0387506	0.286333	0.256119	HK2/AQP1/EPHA2/GHRL/THBS4/C6	6
BP	GO:0032722	positive regulation of chemokine production	2/62	58/18670	0.0159182	0.118502	0.0903626	ADCYAP1/ADIPOQ	2		BP	GO:0010043	response to zinc ion	2/110	53/18670	0.0390103	0.286333	0.256119	SLC30A2/SLC30A8	2
BP	GO:0035306	positive regulation of dephosphorylation	2/62	58/18670	0.0159182	0.118502	0.0903626	FCRL3/PPP1R16B	2		BP	GO:0050732	negative regulation of peptidyl-tyrosine phosphorylation	2/110	53/18670	0.0390103	0.286333	0.256119	PTK6/SPINK1	2
BP	GO:0002819	regulation of adaptive immune response	3/62	160/18670	0.0161527	0.119773	0.0913317	CD1D/SASH3/IL7R	3		BP	GO:0070228	regulation of lymphocyte apoptotic process	2/110	53/18670	0.0390103	0.286333	0.256119	PRKCQ/CCL5	2
BP	GO:0010656	negative regulation of muscle cell apoptotic process	2/62	59/18670	0.0164419	0.120488	0.0918771	ADCYAP1/APOH	2		BP	GO:0002687	positive regulation of leukocyte migration	3/110	128/18670	0.0399936	0.292394	0.261541	CCL5/THBS4/S100A14	3
BP	GO:0046847	filopodium assembly	2/62	59/18670	0.0164419	0.120488	0.0918771	CCR7/PPP1R16B	2		BP	GO:0051651	maintenance of location in cell	4/110	219/18670	0.0406468	0.295783	0.264572	HK2/PDIA2/SLC30A2/SLC30A8	4
BP	GO:0097755	positive regulation of blood vessel diameter	2/62	59/18670	0.0164419	0.120488	0.0918771	ADM/ADCYAP1	2		BP	GO:0007043	cell-cell junction assembly	3/110	129/18670	0.0407756	0.295783	0.264572	PKP3/CDH3/EPHA2	3
BP	GO:0031960	response to corticosteroid	3/62	162/18670	0.0166921	0.121846	0.0929126	ADM/ADCYAP1/ADIPOQ	3		BP	GO:0060042	retina morphogenesis in camera-type eye	2/110	55/18670	0.0417234	0.30148	0.269668	TFAP2A/NTRK2	2
BP	GO:0045576	mast cell activation	2/62	60/18670	0.0169729	0.123415	0.0941091	CHGA/CNR2	2		BP	GO:0044706	multi-multicellular organism process	4/110	222/18670	0.0423751	0.305002	0.272819	SLC2A1/ITGA3/CLDN4/GHRL	4
BP	GO:0030888	regulation of B cell proliferation	2/62	61/18670	0.0175111	0.126414	0.0963959	FCRL3/SASH3	2		BP	GO:1903078	positive regulation of protein localization to plasma membrane	2/110	56/18670	0.0431058	0.30832	0.275787	EPHA2/ITGA3	2
BP	GO:0050680	negative regulation of epithelial cell proliferation	3/62	165/18670	0.0175201	0.126414	0.0963959	NGFR/APOH/SCG2	3		BP	GO:0042476	odontogenesis	3/110	132/18670	0.0431681	0.30832	0.275787	TFAP2A/AQP1/ITGB4	3
BP	GO:0002637	regulation of immunoglobulin production	2/62	63/18670	0.0186092	0.131597	0.100348	FCRL3/SASH3	2		BP	GO:0030595	leukocyte chemotaxis	4/110	224/18670	0.0435503	0.309858	0.277162	CCL5/THBS4/S100A14/PLA2G1B	4
BP	GO:0046888	negative regulation of hormone secretion	2/62	63/18670	0.0186092	0.131597	0.100348	ADIPOQ/CHGA	2		BP	GO:0055076	transition metal ion homeostasis	3/110	133/18670	0.043981	0.310542	0.277775	SLC39A4/SLC30A2/SLC30A8	3
BP	GO:2000401	regulation of lymphocyte migration	2/62	63/18670	0.0186092	0.131597	0.100348	MADCAM1/CXCL12	2		BP	GO:0071333	cellular response to glucose stimulus	3/110	133/18670	0.043981	0.310542	0.277775	GHRL/GJB6/CFTR	3
BP	GO:0045619	regulation of lymphocyte differentiation	3/62	169/18670	0.0186593	0.131597	0.100348	FCRL3/SASH3/IL7R	3		BP	GO:0061178	regulation of insulin secretion involved in cellular response to glucose stimulus	2/110	57/18670	0.0445052	0.313054	0.280021	GHRL/CFTR	2
BP	GO:0050728	negative regulation of inflammatory response	3/62	169/18670	0.0186593	0.131597	0.100348	ADCYAP1/ADIPOQ/CNR2	3		BP	GO:0046683	response to organophosphorus	3/110	134/18670	0.0448015	0.313948	0.280821	AQP1/AQP8/CFTR	3
BP	GO:0097696	receptor signaling pathway via STAT	3/62	169/18670	0.0186593	0.131597	0.100348	IL24/IL7R/NEUROD1	3		BP	GO:0007498	mesoderm development	3/110	135/18670	0.0456296	0.314672	0.281468	EPHA2/ITGB4/ITGA3	3
BP	GO:0043550	regulation of lipid kinase activity	2/62	64/18670	0.0191689	0.134685	0.102703	CCR7/CD19	2		BP	GO:0050921	positive regulation of chemotaxis	3/110	135/18670	0.0456296	0.314672	0.281468	CCL5/THBS4/S100A14	3
BP	GO:0035308	negative regulation of protein dephosphorylation	2/62	65/18670	0.0197357	0.13815	0.105345	PPP1R16B/PPP1R1A	2		BP	GO:0071331	cellular response to hexose stimulus	3/110	135/18670	0.0456296	0.314672	0.281468	GHRL/GJB6/CFTR	3
BP	GO:0002429	immune response-activating cell surface receptor signaling pathway	5/62	473/18670	0.0202754	0.140877	0.107424	FCRL3/CCR7/CYFIP2/CD19/CR2	5		BP	GO:0001655	urogenital system development	5/110	330/18670	0.0456954	0.314672	0.281468	TFAP2A/ITGB4/GPC3/ITGA3/SERPINB5	5
BP	GO:0002757	immune response-activating signal transduction	5/62	473/18670	0.0202754	0.140877	0.107424	FCRL3/CCR7/CYFIP2/CD19/CR2	5		BP	GO:0051222	positive regulation of protein transport	6/110	440/18670	0.0458782	0.314672	0.281468	GHRL/NMU/SFN/PLA2G1B/CFTR/SLC30A8	6
BP	GO:0006956	complement activation	3/62	175/18670	0.0204438	0.141002	0.10752	CLU/CD19/CR2	3		BP	GO:0071385	cellular response to glucocorticoid stimulus	2/110	58/18670	0.0459214	0.314672	0.281468	FLT3/AQP1	2
BP	GO:0010921	regulation of phosphatase activity	3/62	175/18670	0.0204438	0.141002	0.10752	FCRL3/PPP1R16B/PPP1R1A	3		BP	GO:0071326	cellular response to monosaccharide stimulus	3/110	136/18670	0.0464653	0.317228	0.283755	GHRL/GJB6/CFTR	3
BP	GO:0051235	maintenance of location	4/62	315/18670	0.0206235	0.14172	0.108067	CCR7/CD19/ANK2/CORO1A	4		BP	GO:0009743	response to carbohydrate	4/110	230/18670	0.0471853	0.31746	0.283962	GHRL/GJB6/CFTR/SLC30A8	4
BP	GO:0070588	calcium ion transmembrane transport	4/62	319/18670	0.0214862	0.14711	0.112177	CCR7/CD19/ANK2/CORO1A	4		BP	GO:1904018	positive regulation of vasculature development	4/110	230/18670	0.0471853	0.31746	0.283962	HK2/AQP1/GHRL/C6	4
BP	GO:0008064	regulation of actin polymerization or depolymerization	3/62	179/18670	0.0216841	0.147925	0.112799	CCR7/CORO1A/CXCL12	3		BP	GO:0031644	regulation of nervous system process	3/110	137/18670	0.0473086	0.31746	0.283962	VIP/GHRL/NMU	3
BP	GO:0022408	negative regulation of cell-cell adhesion	3/62	180/18670	0.0220005	0.149	0.113619	TIGIT/CXCL12/ADIPOQ	3		BP	GO:0046425	regulation of receptor signaling pathway via JAK-STAT	3/110	137/18670	0.0473086	0.31746	0.283962	FLT3/CCL5/PTK6	3
BP	GO:0030832	regulation of actin filament length	3/62	180/18670	0.0220005	0.149	0.113619	CCR7/CORO1A/CXCL12	3		BP	GO:1902369	negative regulation of RNA catabolic process	2/110	59/18670	0.047354	0.31746	0.283962	PKP3/VIP	2
BP	GO:0022604	regulation of cell morphogenesis	5/62	484/18670	0.0221391	0.149399	0.113923	ARHGAP15/CORO1A/NGFR/CXCL12/SYT4	5		BP	GO:0032507	maintenance of protein location in cell	2/110	60/18670	0.0488029	0.321917	0.287949	HK2/PDIA2	2
BP	GO:0048871	multicellular organismal homeostasis	5/62	486/18670	0.0224896	0.151221	0.115312	CORO1A/SASH3/ADCYAP1/ADIPOQ/NEUROD1	5		BP	GO:0051851	modulation by host of symbiont process	2/110	60/18670	0.0488029	0.321917	0.287949	CCL5/AQP1	2
BP	GO:0032720	negative regulation of tumor necrosis factor production	2/62	70/18670	0.0226736	0.151372	0.115427	SLAMF1/ADIPOQ	2		CC	GO:0043256	laminin complex	2/111	10/19717	0.00137233	0.0768257	0.0696994	LAMB3/LAMC2	2
BP	GO:0033077	T cell differentiation in thymus	2/62	70/18670	0.0226736	0.151372	0.115427	CCR7/IL7R	2		CC	GO:0005788	endoplasmic reticulum lumen	7/111	309/19717	0.00183638	0.0768257	0.0696994	FLT3/GPC3/GHRL/MSLN/COL17A1/PDIA2/ERP27	7
BP	GO:0046677	response to antibiotic	4/62	327/18670	0.0232777	0.152247	0.116095	CLU/ADCYAP1/KCNA5/ADIPOQ	4		CC	GO:0005604	basement membrane	4/111	95/19717	0.00204357	0.0768257	0.0696994	LAMB3/THBS4/LAMC2/COL17A1	4
BP	GO:1904427	positive regulation of calcium ion transmembrane transport	2/62	71/18670	0.0232816	0.152247	0.116095	CD19/ANK2	2		CC	GO:0062023	collagen-containing extracellular matrix	8/111	406/19717	0.00210571	0.0768257	0.0696994	LAMB3/GPC3/MGP/ADAMTS8/THBS4/LAMC2/COL17A1/PRSS1	8
BP	GO:0019933	cAMP-mediated signaling	3/62	184/18670	0.0232915	0.152247	0.116095	ADM/ADCYAP1/CHGA	3		CC	GO:0031253	cell projection membrane	7/111	326/19717	0.00248089	0.0768257	0.0696994	AQP1/EPHA2/EPS8L1/ITGA3/PLEK2/S100P/REG1A	7
BP	GO:0042098	T cell proliferation	3/62	184/18670	0.0232915	0.152247	0.116095	CD1D/CORO1A/SASH3	3		CC	GO:0034707	chloride channel complex	3/111	50/19717	0.00280779	0.0768257	0.0696994	CLIC3/CLDN4/CFTR	3
BP	GO:0048639	positive regulation of developmental growth	3/62	184/18670	0.0232915	0.152247	0.116095	SASH3/CXCL12/SYT4	3		CC	GO:0045178	basal part of cell	3/111	51/19717	0.00297116	0.0768257	0.0696994	AQP1/CLDN4/REG1A	3
BP	GO:0050864	regulation of B cell activation	3/62	184/18670	0.0232915	0.152247	0.116095	FCRL3/CD19/SASH3	3		CC	GO:0045177	apical part of cell	7/111	384/19717	0.00605136	0.128773	0.116828	SLC2A1/AQP1/CLDN4/SLC39A4/GJB6/AQP8/CFTR	7
BP	GO:1903556	negative regulation of tumor necrosis factor superfamily cytokine production	2/62	72/18670	0.0238963	0.155613	0.118661	SLAMF1/ADIPOQ	2		CC	GO:0031258	lamellipodium membrane	2/111	22/19717	0.006741	0.128773	0.116828	EPHA2/PLEK2	2
BP	GO:0032496	response to lipopolysaccharide	4/62	330/18670	0.0239724	0.155613	0.118661	IL24/CCR7/ADM/CNR2	4		CC	GO:0046930	pore complex	2/111	23/19717	0.00735602	0.128773	0.116828	C7/C6	2
BP	GO:0048167	regulation of synaptic plasticity	3/62	187/18670	0.0242864	0.157108	0.119801	CBLN1/SYT4/SCGN	3		CC	GO:0030057	desmosome	2/111	25/19717	0.00865896	0.128773	0.116828	PKP3/EVPL	2
BP	GO:0031100	animal organ regeneration	2/62	73/18670	0.0245176	0.157517	0.120113	ADM/CXCL12	2		CC	GO:0005911	cell-cell junction	7/111	416/19717	0.0092015	0.128773	0.116828	SLC2A1/PKP3/EPHA2/EVPL/CLDN4/COL17A1/GJB6	7
BP	GO:1903524	positive regulation of blood circulation	2/62	73/18670	0.0245176	0.157517	0.120113	ADM/CHGA	2		CC	GO:0016324	apical plasma membrane	6/111	318/19717	0.00924889	0.128773	0.116828	SLC2A1/AQP1/CLDN4/SLC39A4/GJB6/CFTR	6
BP	GO:0030336	negative regulation of cell migration	4/62	334/18670	0.0249181	0.159544	0.121659	IL24/CXCL12/APOH/ADIPOQ	4		CC	GO:0008305	integrin complex	2/111	31/19717	0.0131305	0.149268	0.135422	ITGB4/ITGA3	2
BP	GO:0086001	cardiac muscle cell action potential	2/62	74/18670	0.0251456	0.159909	0.121937	ANK2/KCNA5	2		CC	GO:0019897	extrinsic component of plasma membrane	4/111	165/19717	0.0141758	0.149268	0.135422	PRSS22/PTK6/CDH3/STYK1	4
BP	GO:0086003	cardiac muscle cell contraction	2/62	74/18670	0.0251456	0.159909	0.121937	ANK2/KCNA5	2		CC	GO:0031225	anchored component of membrane	4/111	170/19717	0.0156557	0.149268	0.135422	PRSS22/GPC3/MSLN/GP2	4
BP	GO:0042594	response to starvation	3/62	191/18670	0.0256483	0.162555	0.123955	ADM/KIAA1324/ADCYAP1	3		CC	GO:0031256	leading edge membrane	4/111	170/19717	0.0156557	0.149268	0.135422	EPHA2/EPS8L1/PLEK2/REG1A	4
BP	GO:0007565	female pregnancy	3/62	192/18670	0.0259952	0.163647	0.124788	ADM/ADCYAP1/EPYC	3		CC	GO:0009925	basal plasma membrane	2/111	34/19717	0.015669	0.149268	0.135422	AQP1/CLDN4	2
BP	GO:0043112	receptor metabolic process	3/62	192/18670	0.0259952	0.163647	0.124788	ADM/ADIPOQ/SH3GL2	3		CC	GO:0098636	protein complex involved in cell adhesion	2/111	34/19717	0.015669	0.149268	0.135422	ITGB4/ITGA3	2
BP	GO:0002377	immunoglobulin production	3/62	193/18670	0.0263445	0.164671	0.125568	FCRL3/SASH3/IL7R	3		CC	GO:0031252	cell leading edge	6/111	403/19717	0.0264882	0.239719	0.217482	PTK6/EPHA2/ITGB4/EPS8L1/PLEK2/REG1A	6
BP	GO:0051224	negative regulation of protein transport	3/62	193/18670	0.0263445	0.164671	0.125568	SYT4/ADIPOQ/CHGA	3		CC	GO:0060076	excitatory synapse	2/111	50/19717	0.0322846	0.270327	0.245251	SLC16A3/ITGA3	2
BP	GO:0042310	vasoconstriction	2/62	76/18670	0.0264211	0.164671	0.125568	ADM/KCNA5	2		CC	GO:0043195	terminal bouton	2/111	51/19717	0.033481	0.270327	0.245251	NTRK2/NMU	2
BP	GO:0006809	nitric oxide biosynthetic process	2/62	77/18670	0.0270685	0.167962	0.128078	CLU/SLC7A2	2		CC	GO:0016323	basolateral plasma membrane	4/111	217/19717	0.0343509	0.270327	0.245251	SLC2A1/AQP1/ITGA3/CLDN4	4
BP	GO:0002237	response to molecule of bacterial origin	4/62	343/18670	0.0271281	0.167962	0.128078	IL24/CCR7/ADM/CNR2	4		CC	GO:0042383	sarcolemma	3/111	136/19717	0.0415524	0.313374	0.284306	SLC2A1/AQP1/AHNAK2	3
BP	GO:0002685	regulation of leukocyte migration	3/62	196/18670	0.0274077	0.169135	0.128972	MADCAM1/CCR7/CXCL12	3		CC	GO:0046658	anchored component of plasma membrane	2/111	59/19717	0.0436519	0.31604	0.286724	PRSS22/GPC3	2
BP	GO:0031016	pancreas development	2/62	78/18670	0.0277224	0.169678	0.129387	INSM1/NEUROD1	2		MF	GO:0004252	serine-type endopeptidase activity	10/104	160/17696	3.46595e-08	9.35807e-06	7.77103e-06	PRSS22/TMPRSS4/CTRC/CELA2A/CELA2B/KLK1/CELA3A/CTRB2/PRSS2/PRSS1	10
BP	GO:0009749	response to glucose	3/62	197/18670	0.0277672	0.169678	0.129387	CMA1/ADIPOQ/NEUROD1	3		MF	GO:0008236	serine-type peptidase activity	10/104	182/17696	1.1704e-07	9.68321e-06	8.04103e-06	PRSS22/TMPRSS4/CTRC/CELA2A/CELA2B/KLK1/CELA3A/CTRB2/PRSS2/PRSS1	10
BP	GO:1904950	negative regulation of establishment of protein localization	3/62	197/18670	0.0277672	0.169678	0.129387	SYT4/ADIPOQ/CHGA	3		MF	GO:0016825	hydrolase activity, acting on acid phosphorus-nitrogen bonds	10/104	186/17696	1.43455e-07	9.68321e-06	8.04103e-06	PRSS22/TMPRSS4/CTRC/CELA2A/CELA2B/KLK1/CELA3A/CTRB2/PRSS2/PRSS1	10
BP	GO:0070997	neuron death	4/62	348/18670	0.0284053	0.171334	0.13065	CLU/CORO1A/NGFR/CHGA	4		MF	GO:0017171	serine hydrolase activity	10/104	186/17696	1.43455e-07	9.68321e-06	8.04103e-06	PRSS22/TMPRSS4/CTRC/CELA2A/CELA2B/KLK1/CELA3A/CTRB2/PRSS2/PRSS1	10
BP	GO:2000146	negative regulation of cell motility	4/62	349/18670	0.028665	0.171334	0.13065	IL24/CXCL12/APOH/ADIPOQ	4		MF	GO:0070492	oligosaccharide binding	4/104	15/17696	1.46196e-06	7.8946e-05	6.55575e-05	REG3A/REG3G/REG1B/REG1A	4
BP	GO:0070509	calcium ion import	2/62	80/18670	0.0290491	0.171334	0.13065	FCRL3/CXCL12	2		MF	GO:0042834	peptidoglycan binding	4/104	17/17696	2.5261e-06	0.000113675	9.43964e-05	REG3A/REG3G/REG1B/REG1A	4
BP	GO:0051260	protein homooligomerization	4/62	351/18670	0.0291887	0.171334	0.13065	CLU/GPX3/KCNA5/ADIPOQ	4		MF	GO:0004806	triglyceride lipase activity	4/104	21/17696	6.23852e-06	0.000240628	0.00019982	PNLIPRP2/PNLIP/PNLIPRP1/CEL	4
BP	GO:0009746	response to hexose	3/62	202/18670	0.0296024	0.171334	0.13065	CMA1/ADIPOQ/NEUROD1	3		MF	GO:0004175	endopeptidase activity	12/104	427/17696	7.77825e-06	0.000246896	0.000205025	PRSS22/TMPRSS4/ADAMTS8/CAPN6/CTRC/CELA2A/CELA2B/KLK1/CELA3A/CTRB2/PRSS2/PRSS1	12
BP	GO:1902903	regulation of supramolecular fiber organization	4/62	353/18670	0.0297181	0.171334	0.13065	CCR7/CLU/CORO1A/CXCL12	4		MF	GO:0005539	glycosaminoglycan binding	9/104	229/17696	8.22986e-06	0.000246896	0.000205025	LIPH/ADAMTS8/THBS4/LAMC2/REG3A/REG3G/REG1B/CEL/REG1A	9
BP	GO:2001021	negative regulation of response to DNA damage stimulus	2/62	81/18670	0.0297218	0.171334	0.13065	CLU/CXCL12	2		MF	GO:0016298	lipase activity	7/104	127/17696	9.90717e-06	0.000267494	0.000222129	CCL5/LIPH/PNLIPRP2/PLA2G1B/PNLIP/PNLIPRP1/CEL	7
BP	GO:0034764	positive regulation of transmembrane transport	3/62	204/18670	0.0303542	0.171334	0.13065	CD19/ANK2/ADIPOQ	3		MF	GO:0052689	carboxylic ester hydrolase activity	7/104	136/17696	1.54983e-05	0.000380413	0.000315899	AOAH/LIPH/PNLIPRP2/PLA2G1B/PNLIP/PNLIPRP1/CEL	7
BP	GO:0045766	positive regulation of angiogenesis	3/62	204/18670	0.0303542	0.171334	0.13065	PPP1R16B/CMA1/ADM	3		MF	GO:0004713	protein tyrosine kinase activity	6/104	134/17696	0.000139276	0.0031337	0.00260226	FLT3/NTRK2/PTK6/EPHA2/STYK1/MST1R	6
BP	GO:1902905	positive regulation of supramolecular fiber organization	3/62	204/18670	0.0303542	0.171334	0.13065	CCR7/CLU/CORO1A	3		MF	GO:0050839	cell adhesion molecule binding	11/104	499/17696	0.000168479	0.00349917	0.00290574	PKP3/CDH3/EPHA2/ITGB4/EVPL/EPS8L1/ITGA3/ADAMTS8/THBS4/S100P/SFN	11
BP	GO:0032642	regulation of chemokine production	2/62	82/18670	0.0304008	0.171334	0.13065	ADCYAP1/ADIPOQ	2		MF	GO:0005385	zinc ion transmembrane transporter activity	3/104	20/17696	0.00020903	0.00403129	0.00334762	SLC39A4/SLC30A2/SLC30A8	3
BP	GO:0046209	nitric oxide metabolic process	2/62	82/18670	0.0304008	0.171334	0.13065	CLU/SLC7A2	2		MF	GO:0004714	transmembrane receptor protein tyrosine kinase activity	4/104	62/17696	0.000483361	0.00870049	0.00722497	FLT3/NTRK2/EPHA2/MST1R	4
BP	GO:0055117	regulation of cardiac muscle contraction	2/62	82/18670	0.0304008	0.171334	0.13065	ANK2/CHGA	2		MF	GO:0004181	metallocarboxypeptidase activity	3/104	29/17696	0.000644746	0.0108801	0.00903492	CPA2/CPB1/CPA1	3
BP	GO:0015893	drug transport	3/62	205/18670	0.0307338	0.171334	0.13065	CXCL12/SLC7A2/SYT4	3		MF	GO:0019199	transmembrane receptor protein kinase activity	4/104	79/17696	0.00120627	0.0178886	0.0148549	FLT3/NTRK2/EPHA2/MST1R	4
BP	GO:0030100	regulation of endocytosis	3/62	205/18670	0.0307338	0.171334	0.13065	CLU/SYT4/SH3GL2	3		MF	GO:0046915	transition metal ion transmembrane transporter activity	3/104	36/17696	0.00122284	0.0178886	0.0148549	SLC39A4/SLC30A2/SLC30A8	3
BP	GO:0045582	positive regulation of T cell differentiation	2/62	83/18670	0.0310859	0.171334	0.13065	SASH3/IL7R	2		MF	GO:0017147	Wnt-protein binding	3/104	37/17696	0.00132508	0.0178886	0.0148549	MST1R/SFRP4/SFRP5	3
BP	GO:0050679	positive regulation of epithelial cell proliferation	3/62	206/18670	0.031116	0.171334	0.13065	PPP1R16B/CXCL12/SCG2	3		MF	GO:0072509	divalent inorganic cation transmembrane transporter activity	3/104	37/17696	0.00132508	0.0178886	0.0148549	SLC39A4/SLC30A2/SLC30A8	3
BP	GO:0001666	response to hypoxia	4/62	359/18670	0.0313405	0.171334	0.13065	ADM/CXCL12/KCNA5/ADIPOQ	4		MF	GO:0015250	water channel activity	2/104	11/17696	0.00181754	0.0233684	0.0194053	AQP1/AQP8	2
BP	GO:0002064	epithelial cell development	3/62	207/18670	0.0315007	0.171334	0.13065	PPP1R16B/ADIPOQ/INSM1	3		MF	GO:0005372	water transmembrane transporter activity	2/104	12/17696	0.0021727	0.0263141	0.0218515	AQP1/AQP8	2
BP	GO:0034284	response to monosaccharide	3/62	207/18670	0.0315007	0.171334	0.13065	CMA1/ADIPOQ/NEUROD1	3		MF	GO:0004867	serine-type endopeptidase inhibitor activity	4/104	94/17696	0.00228929	0.0263141	0.0218515	SERPINB5/SERPINI2/SERPINA6/SPINK1	4
BP	GO:0007623	circadian rhythm	3/62	208/18670	0.0318879	0.171334	0.13065	NGFR/PTGDS/ADIPOQ	3		MF	GO:0004180	carboxypeptidase activity	3/104	45/17696	0.00233903	0.0263141	0.0218515	CPA2/CPB1/CPA1	3
BP	GO:0043687	post-translational protein modification	4/62	361/18670	0.0318928	0.171334	0.13065	CHRDL1/SCG2/SCG3/CHGB	4		MF	GO:0005201	extracellular matrix structural constituent	5/104	163/17696	0.00275519	0.029756	0.0247097	LAMB3/MGP/LAMC2/COL17A1/MUC4	5
BP	GO:0008154	actin polymerization or depolymerization	3/62	209/18670	0.0322776	0.171334	0.13065	CCR7/CORO1A/CXCL12	3		MF	GO:0004620	phospholipase activity	4/104	102/17696	0.00307821	0.031966	0.0265449	CCL5/LIPH/PNLIPRP2/PLA2G1B	4
BP	GO:0035303	regulation of dephosphorylation	3/62	209/18670	0.0322776	0.171334	0.13065	FCRL3/PPP1R16B/PPP1R1A	3		MF	GO:0008201	heparin binding	5/104	169/17696	0.00321827	0.0321827	0.0267248	LIPH/ADAMTS8/THBS4/LAMC2/CEL	5
BP	GO:0006936	muscle contraction	4/62	363/18670	0.0324508	0.171334	0.13065	ANK2/RCSD1/KCNA5/CHGA	4		MF	GO:0045296	cadherin binding	7/104	331/17696	0.00339462	0.0327338	0.0271825	PKP3/CDH3/EPHA2/EVPL/EPS8L1/S100P/SFN	7
BP	GO:0050772	positive regulation of axonogenesis	2/62	85/18670	0.0324745	0.171334	0.13065	NGFR/CXCL12	2		MF	GO:0008509	anion transmembrane transporter activity	7/104	336/17696	0.00368536	0.034312	0.028493	SLC16A3/SLC2A1/CLIC3/SLCO4A1/CLDN4/ADAMTS8/CFTR	7
BP	GO:2001057	reactive nitrogen species metabolic process	2/62	85/18670	0.0324745	0.171334	0.13065	CLU/SLC7A2	2		MF	GO:0043621	protein self-association	3/104	56/17696	0.00436104	0.0384124	0.0318981	FLT3/CCL5/SLC2A1	3
BP	GO:0001768	establishment of T cell polarity	1/62	10/18670	0.0327242	0.171334	0.13065	CCR7	1		MF	GO:0030414	peptidase inhibitor activity	5/104	182/17696	0.00441032	0.0384124	0.0318981	GPC3/SERPINB5/SERPINI2/SERPINA6/SPINK1	5
BP	GO:0010739	positive regulation of protein kinase A signaling	1/62	10/18670	0.0327242	0.171334	0.13065	ADIPOQ	1		MF	GO:0030246	carbohydrate binding	6/104	271/17696	0.00530154	0.0447318	0.0371457	HK2/EGLN3/REG3A/REG3G/REG1B/REG1A	6
BP	GO:0014049	positive regulation of glutamate secretion	1/62	10/18670	0.0327242	0.171334	0.13065	SYT4	1		MF	GO:0030296	protein tyrosine kinase activator activity	2/104	19/17696	0.00548041	0.0448398	0.0372354	CCL5/GHRL	2
BP	GO:0015809	arginine transport	1/62	10/18670	0.0327242	0.171334	0.13065	SLC7A2	1		MF	GO:0008235	metalloexopeptidase activity	3/104	62/17696	0.00580089	0.0448953	0.0372815	CPA2/CPB1/CPA1	3
BP	GO:0032463	negative regulation of protein homooligomerization	1/62	10/18670	0.0327242	0.171334	0.13065	CLU	1		MF	GO:0005179	hormone activity	4/104	122/17696	0.00581976	0.0448953	0.0372815	VIP/GHRL/SST/IAPP	4
BP	GO:0032464	positive regulation of protein homooligomerization	1/62	10/18670	0.0327242	0.171334	0.13065	CLU	1		MF	GO:0005178	integrin binding	4/104	132/17696	0.00765783	0.0574337	0.0476935	ITGB4/ITGA3/ADAMTS8/THBS4	4
BP	GO:0045713	low-density lipoprotein particle receptor biosynthetic process	1/62	10/18670	0.0327242	0.171334	0.13065	ADIPOQ	1		MF	GO:0061134	peptidase regulator activity	5/104	219/17696	0.00947996	0.0681406	0.0565846	GPC3/SERPINB5/SERPINI2/SERPINA6/SPINK1	5
BP	GO:0051006	positive regulation of lipoprotein lipase activity	1/62	10/18670	0.0327242	0.171334	0.13065	APOH	1		MF	GO:0005254	chloride channel activity	3/104	75/17696	0.00980419	0.0681406	0.0565846	CLIC3/CLDN4/CFTR	3
BP	GO:0051918	negative regulation of fibrinolysis	1/62	10/18670	0.0327242	0.171334	0.13065	APOH	1		MF	GO:0015103	inorganic anion transmembrane transporter activity	4/104	142/17696	0.00984253	0.0681406	0.0565846	CLIC3/CLDN4/ADAMTS8/CFTR	4
BP	GO:0070942	neutrophil mediated cytotoxicity	1/62	10/18670	0.0327242	0.171334	0.13065	DNASE1L3	1		MF	GO:0090482	vitamin transmembrane transporter activity	2/104	27/17696	0.0109111	0.0736499	0.0611596	SLC2A1/GC	2
BP	GO:0071609	chemokine (C-C motif) ligand 5 production	1/62	10/18670	0.0327242	0.171334	0.13065	ADCYAP1	1		MF	GO:0005253	anion channel activity	3/104	89/17696	0.0155462	0.100752	0.083665	CLIC3/CLDN4/CFTR	3
BP	GO:0072015	glomerular visceral epithelial cell development	1/62	10/18670	0.0327242	0.171334	0.13065	ADIPOQ	1		MF	GO:0005217	intracellular ligand-gated ion channel activity	2/104	33/17696	0.016043	0.100752	0.083665	AQP1/CFTR	2
BP	GO:0072610	interleukin-12 secretion	1/62	10/18670	0.0327242	0.171334	0.13065	CCR7	1		MF	GO:1901681	sulfur compound binding	5/104	250/17696	0.0160456	0.100752	0.083665	LIPH/ADAMTS8/THBS4/LAMC2/CEL	5
BP	GO:0097050	type B pancreatic cell apoptotic process	1/62	10/18670	0.0327242	0.171334	0.13065	NEUROD1	1		MF	GO:0005496	steroid binding	3/104	95/17696	0.0184773	0.113384	0.0941549	GC/SERPINA6/PDIA2	3
BP	GO:0098917	retrograde trans-synaptic signaling	1/62	10/18670	0.0327242	0.171334	0.13065	SYT4	1		MF	GO:0004866	endopeptidase inhibitor activity	4/104	175/17696	0.0197821	0.116988	0.0971476	SERPINB5/SERPINI2/SERPINA6/SPINK1	4
BP	GO:1990416	cellular response to brain-derived neurotrophic factor stimulus	1/62	10/18670	0.0327242	0.171334	0.13065	SH3GL2	1		MF	GO:0015144	carbohydrate transmembrane transporter activity	2/104	37/17696	0.0199312	0.116988	0.0971476	SLC2A1/AQP1	2
BP	GO:1990822	basic amino acid transmembrane transport	1/62	10/18670	0.0327242	0.171334	0.13065	SLC7A2	1		MF	GO:0015108	chloride transmembrane transporter activity	3/104	100/17696	0.0211386	0.121434	0.10084	CLIC3/CLDN4/CFTR	3
BP	GO:2000035	regulation of stem cell division	1/62	10/18670	0.0327242	0.171334	0.13065	NAP1L2	1		MF	GO:0008237	metallopeptidase activity	4/104	181/17696	0.0220729	0.123813	0.102816	ADAMTS8/CPA2/CPB1/CPA1	4
BP	GO:2001214	positive regulation of vasculogenesis	1/62	10/18670	0.0327242	0.171334	0.13065	ADM	1		MF	GO:0061135	endopeptidase regulator activity	4/104	182/17696	0.0224698	0.123813	0.102816	SERPINB5/SERPINI2/SERPINA6/SPINK1	4
BP	GO:0032760	positive regulation of tumor necrosis factor production	2/62	86/18670	0.0331779	0.171334	0.13065	CLU/SASH3	2		MF	GO:0004857	enzyme inhibitor activity	6/104	375/17696	0.0232958	0.124766	0.103607	GPC3/SERPINB5/SFN/SERPINI2/SERPINA6/SPINK1	6
BP	GO:0070542	response to fatty acid	2/62	86/18670	0.0331779	0.171334	0.13065	CCR7/ADIPOQ	2		MF	GO:0048018	receptor ligand activity	7/104	482/17696	0.0235669	0.124766	0.103607	CCL5/VIP/GHRL/THBS4/SST/IAPP/REG1A	7
BP	GO:0019935	cyclic-nucleotide-mediated signaling	3/62	212/18670	0.0334617	0.171334	0.13065	ADM/ADCYAP1/CHGA	3		MF	GO:0030546	signaling receptor activator activity	7/104	487/17696	0.0247555	0.126245	0.104835	CCL5/VIP/GHRL/THBS4/SST/IAPP/REG1A	7
BP	GO:1903531	negative regulation of secretion by cell	3/62	212/18670	0.0334617	0.171334	0.13065	SYT4/ADIPOQ/CHGA	3		MF	GO:0001664	G protein-coupled receptor binding	5/104	280/17696	0.0247815	0.126245	0.104835	CCL5/ITGB4/GHRL/S100A14/NMU	5
BP	GO:0002690	positive regulation of leukocyte chemotaxis	2/62	87/18670	0.0338872	0.171334	0.13065	CCR7/CXCL12	2		MF	GO:1901618	organic hydroxy compound transmembrane transporter activity	2/104	44/17696	0.0275705	0.137853	0.114474	SLC16A3/AQP1	2
BP	GO:0006909	phagocytosis	4/62	369/18670	0.0341593	0.171334	0.13065	SLAMF1/CYFIP2/CORO1A/ADIPOQ	4		MF	GO:0008238	exopeptidase activity	3/104	113/17696	0.0289906	0.142317	0.118182	CPA2/CPB1/CPA1	3
BP	GO:0032535	regulation of cellular component size	4/62	370/18670	0.0344491	0.171334	0.13065	CCR7/CORO1A/IL7R/CXCL12	4		MF	GO:0004715	non-membrane spanning protein tyrosine kinase activity	2/104	46/17696	0.0299374	0.144341	0.119862	PTK6/STYK1	2
BP	GO:0036293	response to decreased oxygen levels	4/62	370/18670	0.0344491	0.171334	0.13065	ADM/CXCL12/KCNA5/ADIPOQ	4		MF	GO:0008514	organic anion transmembrane transporter activity	4/104	210/17696	0.0353798	0.167588	0.139167	SLC16A3/SLC2A1/SLCO4A1/CFTR	4
BP	GO:0070098	chemokine-mediated signaling pathway	2/62	88/18670	0.0346025	0.171334	0.13065	CCR7/CXCL12	2
BP	GO:1903557	positive regulation of tumor necrosis factor superfamily cytokine production	2/62	88/18670	0.0346025	0.171334	0.13065	CLU/SASH3	2
BP	GO:1903725	regulation of phospholipid metabolic process	2/62	88/18670	0.0346025	0.171334	0.13065	CCR7/CD19	2
BP	GO:1904035	regulation of epithelial cell apoptotic process	2/62	88/18670	0.0346025	0.171334	0.13065	SCG2/NEUROD1	2
BP	GO:2000177	regulation of neural precursor cell proliferation	2/62	88/18670	0.0346025	0.171334	0.13065	ADCYAP1/INSM1	2
BP	GO:0032602	chemokine production	2/62	89/18670	0.0353236	0.171334	0.13065	ADCYAP1/ADIPOQ	2
BP	GO:0050920	regulation of chemotaxis	3/62	217/18670	0.0354853	0.171334	0.13065	CCR7/CXCL12/SCG2	3
BP	GO:0071805	potassium ion transmembrane transport	3/62	217/18670	0.0354853	0.171334	0.13065	ANK2/KCNA5/ABCC8	3
BP	GO:0016064	immunoglobulin mediated immune response	3/62	218/18670	0.0358974	0.171334	0.13065	CLU/CD19/CR2	3
BP	GO:0001767	establishment of lymphocyte polarity	1/62	11/18670	0.0359381	0.171334	0.13065	CCR7	1
BP	GO:0001821	histamine secretion	1/62	11/18670	0.0359381	0.171334	0.13065	ADCYAP1	1
BP	GO:0002604	regulation of dendritic cell antigen processing and presentation	1/62	11/18670	0.0359381	0.171334	0.13065	CCR7	1
BP	GO:0002638	negative regulation of immunoglobulin production	1/62	11/18670	0.0359381	0.171334	0.13065	FCRL3	1
BP	GO:0019371	cyclooxygenase pathway	1/62	11/18670	0.0359381	0.171334	0.13065	PTGDS	1
BP	GO:0033089	positive regulation of T cell differentiation in thymus	1/62	11/18670	0.0359381	0.171334	0.13065	IL7R	1
BP	GO:0034115	negative regulation of heterotypic cell-cell adhesion	1/62	11/18670	0.0359381	0.171334	0.13065	ADIPOQ	1
BP	GO:0045060	negative thymic T cell selection	1/62	11/18670	0.0359381	0.171334	0.13065	CCR7	1
BP	GO:0046886	positive regulation of hormone biosynthetic process	1/62	11/18670	0.0359381	0.171334	0.13065	ADM	1
BP	GO:0061365	positive regulation of triglyceride lipase activity	1/62	11/18670	0.0359381	0.171334	0.13065	APOH	1
BP	GO:0070587	regulation of cell-cell adhesion involved in gastrulation	1/62	11/18670	0.0359381	0.171334	0.13065	ADIPOQ	1
BP	GO:0072310	glomerular epithelial cell development	1/62	11/18670	0.0359381	0.171334	0.13065	ADIPOQ	1
BP	GO:0072321	chaperone-mediated protein transport	1/62	11/18670	0.0359381	0.171334	0.13065	CLU	1
BP	GO:0086023	adenylate cyclase-activating adrenergic receptor signaling pathway involved in heart process	1/62	11/18670	0.0359381	0.171334	0.13065	CHGA	1
BP	GO:0090193	positive regulation of glomerulus development	1/62	11/18670	0.0359381	0.171334	0.13065	ADIPOQ	1
BP	GO:0090394	negative regulation of excitatory postsynaptic potential	1/62	11/18670	0.0359381	0.171334	0.13065	CBLN1	1
BP	GO:0099151	regulation of postsynaptic density assembly	1/62	11/18670	0.0359381	0.171334	0.13065	CBLN1	1
BP	GO:0099624	atrial cardiac muscle cell membrane repolarization	1/62	11/18670	0.0359381	0.171334	0.13065	KCNA5	1
BP	GO:1901077	regulation of relaxation of muscle	1/62	11/18670	0.0359381	0.171334	0.13065	CHGA	1
BP	GO:1904995	negative regulation of leukocyte adhesion to vascular endothelial cell	1/62	11/18670	0.0359381	0.171334	0.13065	CXCL12	1
BP	GO:2000615	regulation of histone H3-K9 acetylation	1/62	11/18670	0.0359381	0.171334	0.13065	NAP1L2	1
BP	GO:2000786	positive regulation of autophagosome assembly	1/62	11/18670	0.0359381	0.171334	0.13065	KIAA1324	1
BP	GO:0007188	adenylate cyclase-modulating G protein-coupled receptor signaling pathway	3/62	221/18670	0.0371489	0.171334	0.13065	ADM/ADCYAP1/CHGA	3
BP	GO:0019724	B cell mediated immunity	3/62	221/18670	0.0371489	0.171334	0.13065	CLU/CD19/CR2	3
BP	GO:0006869	lipid transport	4/62	380/18670	0.0374265	0.171334	0.13065	CLU/PLA2G2A/APOH/ADIPOQ	4
BP	GO:1904894	positive regulation of receptor signaling pathway via STAT	2/62	92/18670	0.0375219	0.171334	0.13065	IL24/IL7R	2
BP	GO:0044706	multi-multicellular organism process	3/62	222/18670	0.037571	0.171334	0.13065	ADM/ADCYAP1/EPYC	3
BP	GO:0040013	negative regulation of locomotion	4/62	381/18670	0.0377322	0.171334	0.13065	IL24/CXCL12/APOH/ADIPOQ	4
BP	GO:0003073	regulation of systemic arterial blood pressure	2/62	93/18670	0.0382662	0.171334	0.13065	CMA1/ADM	2
BP	GO:0051271	negative regulation of cellular component movement	4/62	384/18670	0.038658	0.171334	0.13065	IL24/CXCL12/APOH/ADIPOQ	4
BP	GO:0006906	vesicle fusion	2/62	94/18670	0.039016	0.171334	0.13065	CORO1A/SYT4	2
BP	GO:0045621	positive regulation of lymphocyte differentiation	2/62	94/18670	0.039016	0.171334	0.13065	SASH3/IL7R	2
BP	GO:0002002	regulation of angiotensin levels in blood	1/62	12/18670	0.0391415	0.171334	0.13065	CMA1	1
BP	GO:0002003	angiotensin maturation	1/62	12/18670	0.0391415	0.171334	0.13065	CMA1	1
BP	GO:0002468	dendritic cell antigen processing and presentation	1/62	12/18670	0.0391415	0.171334	0.13065	CCR7	1
BP	GO:0002551	mast cell chemotaxis	1/62	12/18670	0.0391415	0.171334	0.13065	CHGA	1
BP	GO:0002674	negative regulation of acute inflammatory response	1/62	12/18670	0.0391415	0.171334	0.13065	ADCYAP1	1
BP	GO:0002862	negative regulation of inflammatory response to antigenic stimulus	1/62	12/18670	0.0391415	0.171334	0.13065	ADCYAP1	1
BP	GO:0002863	positive regulation of inflammatory response to antigenic stimulus	1/62	12/18670	0.0391415	0.171334	0.13065	CCR7	1
BP	GO:0010623	programmed cell death involved in cell development	1/62	12/18670	0.0391415	0.171334	0.13065	DNASE1L3	1
BP	GO:0016045	detection of bacterium	1/62	12/18670	0.0391415	0.171334	0.13065	CD1D	1
BP	GO:0038180	nerve growth factor signaling pathway	1/62	12/18670	0.0391415	0.171334	0.13065	CORO1A	1
BP	GO:0043383	negative T cell selection	1/62	12/18670	0.0391415	0.171334	0.13065	CCR7	1
BP	GO:0046929	negative regulation of neurotransmitter secretion	1/62	12/18670	0.0391415	0.171334	0.13065	SYT4	1
BP	GO:0051481	negative regulation of cytosolic calcium ion concentration	1/62	12/18670	0.0391415	0.171334	0.13065	KCNA5	1
BP	GO:0051608	histamine transport	1/62	12/18670	0.0391415	0.171334	0.13065	ADCYAP1	1
BP	GO:0060081	membrane hyperpolarization	1/62	12/18670	0.0391415	0.171334	0.13065	KCNA5	1
BP	GO:0060670	branching involved in labyrinthine layer morphogenesis	1/62	12/18670	0.0391415	0.171334	0.13065	ADM	1
BP	GO:0070586	cell-cell adhesion involved in gastrulation	1/62	12/18670	0.0391415	0.171334	0.13065	ADIPOQ	1
BP	GO:0071639	positive regulation of monocyte chemotactic protein-1 production	1/62	12/18670	0.0391415	0.171334	0.13065	ADIPOQ	1
BP	GO:0090148	membrane fission	1/62	12/18670	0.0391415	0.171334	0.13065	SH3GL2	1
BP	GO:0097531	mast cell migration	1/62	12/18670	0.0391415	0.171334	0.13065	CHGA	1
BP	GO:0099150	regulation of postsynaptic specialization assembly	1/62	12/18670	0.0391415	0.171334	0.13065	CBLN1	1
BP	GO:0099550	trans-synaptic signaling, modulating synaptic transmission	1/62	12/18670	0.0391415	0.171334	0.13065	SYT4	1
BP	GO:0150052	regulation of postsynapse assembly	1/62	12/18670	0.0391415	0.171334	0.13065	CBLN1	1
BP	GO:0019882	antigen processing and presentation	3/62	226/18670	0.0392842	0.171334	0.13065	CCR7/CD1D/SH3GL2	3
BP	GO:0042116	macrophage activation	2/62	95/18670	0.0397716	0.171334	0.13065	CLU/SLC7A2	2
BP	GO:0032970	regulation of actin filament-based process	4/62	388/18670	0.0399127	0.171334	0.13065	CCR7/ANK2/CORO1A/CXCL12	4
BP	GO:0010660	regulation of muscle cell apoptotic process	2/62	96/18670	0.0405326	0.171334	0.13065	ADCYAP1/APOH	2
BP	GO:0001894	tissue homeostasis	3/62	229/18670	0.040595	0.171334	0.13065	CORO1A/SASH3/NEUROD1	3
BP	GO:0009743	response to carbohydrate	3/62	230/18670	0.0410368	0.171334	0.13065	CMA1/ADIPOQ/NEUROD1	3
BP	GO:1904018	positive regulation of vasculature development	3/62	230/18670	0.0410368	0.171334	0.13065	PPP1R16B/CMA1/ADM	3
BP	GO:2001234	negative regulation of apoptotic signaling pathway	3/62	230/18670	0.0410368	0.171334	0.13065	CLU/CXCL12/SCG2	3
BP	GO:0006942	regulation of striated muscle contraction	2/62	97/18670	0.0412992	0.171334	0.13065	ANK2/CHGA	2
BP	GO:0120162	positive regulation of cold-induced thermogenesis	2/62	97/18670	0.0412992	0.171334	0.13065	ADCYAP1/ADIPOQ	2
BP	GO:1990868	response to chemokine	2/62	97/18670	0.0412992	0.171334	0.13065	CCR7/CXCL12	2
BP	GO:1990869	cellular response to chemokine	2/62	97/18670	0.0412992	0.171334	0.13065	CCR7/CXCL12	2
BP	GO:0070482	response to oxygen levels	4/62	394/18670	0.0418384	0.171334	0.13065	ADM/CXCL12/KCNA5/ADIPOQ	4
BP	GO:2001243	negative regulation of intrinsic apoptotic signaling pathway	2/62	98/18670	0.0420713	0.171334	0.13065	CLU/CXCL12	2
BP	GO:0001845	phagolysosome assembly	1/62	13/18670	0.0423344	0.171334	0.13065	CORO1A	1
BP	GO:0002430	complement receptor mediated signaling pathway	1/62	13/18670	0.0423344	0.171334	0.13065	CR2	1
BP	GO:0010642	negative regulation of platelet-derived growth factor receptor signaling pathway	1/62	13/18670	0.0423344	0.171334	0.13065	ADIPOQ	1
BP	GO:0010745	negative regulation of macrophage derived foam cell differentiation	1/62	13/18670	0.0423344	0.171334	0.13065	ADIPOQ	1
BP	GO:0021681	cerebellar granular layer development	1/62	13/18670	0.0423344	0.171334	0.13065	CBLN1	1
BP	GO:0031274	positive regulation of pseudopodium assembly	1/62	13/18670	0.0423344	0.171334	0.13065	CCR7	1
BP	GO:0031953	negative regulation of protein autophosphorylation	1/62	13/18670	0.0423344	0.171334	0.13065	ADIPOQ	1
BP	GO:0033004	negative regulation of mast cell activation	1/62	13/18670	0.0423344	0.171334	0.13065	CNR2	1
BP	GO:0033605	positive regulation of catecholamine secretion	1/62	13/18670	0.0423344	0.171334	0.13065	CXCL12	1
BP	GO:0034374	low-density lipoprotein particle remodeling	1/62	13/18670	0.0423344	0.171334	0.13065	PLA2G2A	1
BP	GO:0035589	G protein-coupled purinergic nucleotide receptor signaling pathway	1/62	13/18670	0.0423344	0.171334	0.13065	P2RY10	1
BP	GO:0042415	norepinephrine metabolic process	1/62	13/18670	0.0423344	0.171334	0.13065	INSM1	1
BP	GO:0043116	negative regulation of vascular permeability	1/62	13/18670	0.0423344	0.171334	0.13065	ADM	1
BP	GO:0043970	histone H3-K9 acetylation	1/62	13/18670	0.0423344	0.171334	0.13065	NAP1L2	1
BP	GO:0045759	negative regulation of action potential	1/62	13/18670	0.0423344	0.171334	0.13065	CNR2	1
BP	GO:0050966	detection of mechanical stimulus involved in sensory perception of pain	1/62	13/18670	0.0423344	0.171334	0.13065	CXCL12	1
BP	GO:0051001	negative regulation of nitric-oxide synthase activity	1/62	13/18670	0.0423344	0.171334	0.13065	CNR2	1
BP	GO:0051386	regulation of neurotrophin TRK receptor signaling pathway	1/62	13/18670	0.0423344	0.171334	0.13065	CYFIP2	1
BP	GO:0060123	regulation of growth hormone secretion	1/62	13/18670	0.0423344	0.171334	0.13065	ADCYAP1	1
BP	GO:0060712	spongiotrophoblast layer development	1/62	13/18670	0.0423344	0.171334	0.13065	ADM	1
BP	GO:0070208	protein heterotrimerization	1/62	13/18670	0.0423344	0.171334	0.13065	ADIPOQ	1
BP	GO:0071872	cellular response to epinephrine stimulus	1/62	13/18670	0.0423344	0.171334	0.13065	ADIPOQ	1
BP	GO:1902430	negative regulation of amyloid-beta formation	1/62	13/18670	0.0423344	0.171334	0.13065	CLU	1
BP	GO:1902947	regulation of tau-protein kinase activity	1/62	13/18670	0.0423344	0.171334	0.13065	CLU	1
BP	GO:0097305	response to alcohol	3/62	233/18670	0.042377	0.171334	0.13065	CCR7/ADCYAP1/ADIPOQ	3
BP	GO:0030301	cholesterol transport	2/62	99/18670	0.0428489	0.17181	0.131012	CLU/ADIPOQ	2
BP	GO:0030838	positive regulation of actin filament polymerization	2/62	99/18670	0.0428489	0.17181	0.131012	CCR7/CORO1A	2
BP	GO:0002824	positive regulation of adaptive immune response based on somatic recombination of immune receptors built from immunoglobulin superfamily domains	2/62	100/18670	0.0436318	0.17181	0.131012	CD1D/SASH3	2
BP	GO:0007200	phospholipase C-activating G protein-coupled receptor signaling pathway	2/62	100/18670	0.0436318	0.17181	0.131012	P2RY10/CHGA	2
BP	GO:0010657	muscle cell apoptotic process	2/62	100/18670	0.0436318	0.17181	0.131012	ADCYAP1/APOH	2
BP	GO:0090174	organelle membrane fusion	2/62	100/18670	0.0436318	0.17181	0.131012	CORO1A/SYT4	2
BP	GO:0032102	negative regulation of response to external stimulus	4/62	400/18670	0.0438163	0.17181	0.131012	ADCYAP1/APOH/ADIPOQ/CNR2	4
BP	GO:0032611	interleukin-1 beta production	2/62	101/18670	0.0444201	0.17181	0.131012	CCR7/CMA1	2
BP	GO:0032649	regulation of interferon-gamma production	2/62	101/18670	0.0444201	0.17181	0.131012	CCR7/SASH3	2
BP	GO:0048259	regulation of receptor-mediated endocytosis	2/62	101/18670	0.0444201	0.17181	0.131012	CLU/SH3GL2	2
BP	GO:0050830	defense response to Gram-positive bacterium	2/62	101/18670	0.0444201	0.17181	0.131012	PLA2G2A/CHGA	2
BP	GO:0097006	regulation of plasma lipoprotein particle levels	2/62	101/18670	0.0444201	0.17181	0.131012	PLA2G2A/ADIPOQ	2
BP	GO:0051048	negative regulation of secretion	3/62	238/18670	0.0446593	0.17181	0.131012	SYT4/ADIPOQ/CHGA	3
BP	GO:0031348	negative regulation of defense response	3/62	239/18670	0.0451231	0.17181	0.131012	ADCYAP1/ADIPOQ/CNR2	3
BP	GO:0002367	cytokine production involved in immune response	2/62	102/18670	0.0452136	0.17181	0.131012	SASH3/CHGA	2
BP	GO:0021549	cerebellum development	2/62	102/18670	0.0452136	0.17181	0.131012	CBLN1/NEUROD1	2
BP	GO:0043547	positive regulation of GTPase activity	4/62	405/18670	0.0455044	0.17181	0.131012	CCR7/ARHGAP15/ADCYAP1/ACAP1	4
BP	GO:0001771	immunological synapse formation	1/62	14/18670	0.0455169	0.17181	0.131012	CCR7	1
BP	GO:0031272	regulation of pseudopodium assembly	1/62	14/18670	0.0455169	0.17181	0.131012	CCR7	1
BP	GO:0034392	negative regulation of smooth muscle cell apoptotic process	1/62	14/18670	0.0455169	0.17181	0.131012	APOH	1
BP	GO:0044090	positive regulation of vacuole organization	1/62	14/18670	0.0455169	0.17181	0.131012	KIAA1324	1
BP	GO:0050720	interleukin-1 beta biosynthetic process	1/62	14/18670	0.0455169	0.17181	0.131012	CMA1	1
BP	GO:0050862	positive regulation of T cell receptor signaling pathway	1/62	14/18670	0.0455169	0.17181	0.131012	CCR7	1
BP	GO:0051917	regulation of fibrinolysis	1/62	14/18670	0.0455169	0.17181	0.131012	APOH	1
BP	GO:0060452	positive regulation of cardiac muscle contraction	1/62	14/18670	0.0455169	0.17181	0.131012	CHGA	1
BP	GO:0072216	positive regulation of metanephros development	1/62	14/18670	0.0455169	0.17181	0.131012	ADIPOQ	1
BP	GO:0086069	bundle of His cell to Purkinje myocyte communication	1/62	14/18670	0.0455169	0.17181	0.131012	KCNA5	1
BP	GO:0097202	activation of cysteine-type endopeptidase activity	1/62	14/18670	0.0455169	0.17181	0.131012	CYFIP2	1
BP	GO:0098543	detection of other organism	1/62	14/18670	0.0455169	0.17181	0.131012	CD1D	1
BP	GO:1900121	negative regulation of receptor binding	1/62	14/18670	0.0455169	0.17181	0.131012	ADIPOQ	1
BP	GO:1900452	regulation of long-term synaptic depression	1/62	14/18670	0.0455169	0.17181	0.131012	CBLN1	1
BP	GO:1904889	regulation of excitatory synapse assembly	1/62	14/18670	0.0455169	0.17181	0.131012	CBLN1	1
BP	GO:2001212	regulation of vasculogenesis	1/62	14/18670	0.0455169	0.17181	0.131012	ADM	1
BP	GO:0008630	intrinsic apoptotic signaling pathway in response to DNA damage	2/62	104/18670	0.0468166	0.176361	0.134483	CLU/CXCL12	2
BP	GO:0019216	regulation of lipid metabolic process	4/62	410/18670	0.0472289	0.177016	0.134982	CCR7/CD19/ADM/ADIPOQ	4
BP	GO:0031334	positive regulation of protein-containing complex assembly	3/62	244/18670	0.047478	0.177016	0.134982	CCR7/CLU/CORO1A	3
BP	GO:0002708	positive regulation of lymphocyte mediated immunity	2/62	105/18670	0.0476259	0.177016	0.134982	CD1D/SASH3	2
BP	GO:0002821	positive regulation of adaptive immune response	2/62	105/18670	0.0476259	0.177016	0.134982	CD1D/SASH3	2
BP	GO:0042136	neurotransmitter biosynthetic process	2/62	106/18670	0.0484403	0.177016	0.134982	CLU/SLC7A2	2
BP	GO:2001023	regulation of response to drug	2/62	106/18670	0.0484403	0.177016	0.134982	CXCL12/SYT4	2
BP	GO:0015802	basic amino acid transport	1/62	15/18670	0.0486889	0.177016	0.134982	SLC7A2	1
BP	GO:0030852	regulation of granulocyte differentiation	1/62	15/18670	0.0486889	0.177016	0.134982	ADIPOQ	1
BP	GO:0032352	positive regulation of hormone metabolic process	1/62	15/18670	0.0486889	0.177016	0.134982	ADM	1
BP	GO:0048172	regulation of short-term neuronal synaptic plasticity	1/62	15/18670	0.0486889	0.177016	0.134982	SYT4	1
BP	GO:0050961	detection of temperature stimulus involved in sensory perception	1/62	15/18670	0.0486889	0.177016	0.134982	CXCL12	1
BP	GO:0050965	detection of temperature stimulus involved in sensory perception of pain	1/62	15/18670	0.0486889	0.177016	0.134982	CXCL12	1
BP	GO:0060253	negative regulation of glial cell proliferation	1/62	15/18670	0.0486889	0.177016	0.134982	ADCYAP1	1
BP	GO:0071474	cellular hyperosmotic response	1/62	15/18670	0.0486889	0.177016	0.134982	RCSD1	1
BP	GO:0072148	epithelial cell fate commitment	1/62	15/18670	0.0486889	0.177016	0.134982	NEUROD1	1
BP	GO:0090192	regulation of glomerulus development	1/62	15/18670	0.0486889	0.177016	0.134982	ADIPOQ	1
BP	GO:1903729	regulation of plasma membrane organization	1/62	15/18670	0.0486889	0.177016	0.134982	SH3GL2	1
BP	GO:1905874	regulation of postsynaptic density organization	1/62	15/18670	0.0486889	0.177016	0.134982	CBLN1	1
BP	GO:0010876	lipid localization	4/62	415/18670	0.0489897	0.177765	0.135553	CLU/PLA2G2A/APOH/ADIPOQ	4
CC	GO:0030133	transport vesicle	7/66	392/19717	0.000330435	0.0455486	0.0385652	PCSK1/SYT4/SH3GL2/SCG3/SCGN/CHGA/PCSK2	7
CC	GO:0030658	transport vesicle membrane	5/66	208/19717	0.000660124	0.0455486	0.0385652	SYT4/SH3GL2/SCG3/SCGN/CHGA	5
CC	GO:0031045	dense core granule	2/66	19/19717	0.00181898	0.0812904	0.0688272	SYT4/SCG2	2
CC	GO:0062023	collagen-containing extracellular matrix	6/66	406/19717	0.00235624	0.0812904	0.0688272	CBLN1/CMA1/CLU/CXCL12/APOH/ADIPOQ	6
CC	GO:0034364	high-density lipoprotein particle	2/66	26/19717	0.00340534	0.0862078	0.0729906	CLU/APOH	2
CC	GO:0005788	endoplasmic reticulum lumen	5/66	309/19717	0.00374817	0.0862078	0.0729906	CHRDL1/CLU/SCG2/SCG3/CHGB	5
CC	GO:0034358	plasma lipoprotein particle	2/66	37/19717	0.00681509	0.115767	0.0980182	CLU/APOH	2
CC	GO:1990777	lipoprotein particle	2/66	37/19717	0.00681509	0.115767	0.0980182	CLU/APOH	2
CC	GO:0032994	protein-lipid complex	2/66	39/19717	0.00755005	0.115767	0.0980182	CLU/APOH	2
CC	GO:0009897	external side of plasma membrane	5/66	393/19717	0.010142	0.129012	0.109232	CCR7/CD1D/CD19/IL7R/CXCL12	5
CC	GO:0043204	perikaryon	3/66	134/19717	0.0102836	0.129012	0.109232	ADCYAP1/PCSK2/CNR2	3
CC	GO:0014704	intercalated disc	2/66	50/19717	0.0121905	0.14019	0.118697	ANK2/KCNA5	2
CC	GO:0034774	secretory granule lumen	4/66	321/19717	0.0225674	0.20572	0.174179	CLU/PCSK1/APOH/SCG3	4
CC	GO:0060205	cytoplasmic vesicle lumen	4/66	325/19717	0.0234869	0.20572	0.174179	CLU/PCSK1/APOH/SCG3	4
CC	GO:0044291	cell-cell contact zone	2/66	71/19717	0.0236442	0.20572	0.174179	ANK2/KCNA5	2
CC	GO:0031983	vesicle lumen	4/66	327/19717	0.023955	0.20572	0.174179	CLU/PCSK1/APOH/SCG3	4
CC	GO:0043025	neuronal cell body	5/66	497/19717	0.0253423	0.20572	0.174179	ADCYAP1/SYT4/SH3GL2/PCSK2/CNR2	5
CC	GO:0098978	glutamatergic synapse	4/66	349/19717	0.0294819	0.226028	0.191374	CBLN1/CORO1A/SYT4/SH3GL2	4
CC	GO:0097470	ribbon synapse	1/66	10/19717	0.0329813	0.239549	0.202821	SH3GL2	1
CC	GO:0097449	astrocyte projection	1/66	12/19717	0.0394479	0.239582	0.202849	SYT4	1
CC	GO:0034705	potassium channel complex	2/66	96/19717	0.0411431	0.239582	0.202849	KCNA5/ABCC8	2
CC	GO:0042627	chylomicron	1/66	13/19717	0.0426651	0.239582	0.202849	APOH	1
CC	GO:0031089	platelet dense granule lumen	1/66	14/19717	0.0458718	0.239582	0.202849	APOH	1
CC	GO:0043083	synaptic cleft	1/66	14/19717	0.0458718	0.239582	0.202849	CBLN1	1
CC	GO:0099523	presynaptic cytosol	1/66	14/19717	0.0458718	0.239582	0.202849	SH3GL2	1
CC	GO:0030672	synaptic vesicle membrane	2/66	104/19717	0.0475141	0.239582	0.202849	SYT4/SH3GL2	2
CC	GO:0099501	exocytic vesicle membrane	2/66	104/19717	0.0475141	0.239582	0.202849	SYT4/SH3GL2	2
MF	GO:0048018	receptor ligand activity	8/62	482/17696	0.000265812	0.0272121	0.0242952	IL24/ADM/CXCL12/ADCYAP1/LTB/SCG2/ADIPOQ/CHGB	8
MF	GO:0030546	signaling receptor activator activity	8/62	487/17696	0.000284943	0.0272121	0.0242952	IL24/ADM/CXCL12/ADCYAP1/LTB/SCG2/ADIPOQ/CHGB	8
MF	GO:0005179	hormone activity	4/62	122/17696	0.000880995	0.0493045	0.0440195	ADM/ADCYAP1/ADIPOQ/CHGB	4
MF	GO:0005125	cytokine activity	5/62	220/17696	0.00103256	0.0493045	0.0440195	IL24/CXCL12/LTB/SCG2/ADIPOQ	5
MF	GO:0140375	immune receptor activity	3/62	128/17696	0.0102491	0.292442	0.261094	CCR7/CR2/IL7R	3
MF	GO:0003823	antigen binding	3/62	160/17696	0.0185916	0.292442	0.261094	SLAMF1/CD1D/IL7R	3
MF	GO:0004252	serine-type endopeptidase activity	3/62	160/17696	0.0185916	0.292442	0.261094	CMA1/PCSK1/PCSK2	3
MF	GO:0042277	peptide binding	4/62	295/17696	0.0198204	0.292442	0.261094	CD1D/CMA1/CLU/NGFR	4
MF	GO:0017022	myosin binding	2/62	71/17696	0.025708	0.292442	0.261094	RAB39B/CORO1A	2
MF	GO:0008236	serine-type peptidase activity	3/62	182/17696	0.025988	0.292442	0.261094	CMA1/PCSK1/PCSK2	3
MF	GO:0016825	hydrolase activity, acting on acid phosphorus-nitrogen bonds	3/62	186/17696	0.0274794	0.292442	0.261094	CMA1/PCSK1/PCSK2	3
MF	GO:0017171	serine hydrolase activity	3/62	186/17696	0.0274794	0.292442	0.261094	CMA1/PCSK1/PCSK2	3
MF	GO:0001618	virus receptor activity	2/62	74/17696	0.0277567	0.292442	0.261094	SLAMF1/CR2	2
MF	GO:0140272	exogenous protein binding	2/62	74/17696	0.0277567	0.292442	0.261094	SLAMF1/CR2	2
MF	GO:0001540	amyloid-beta binding	2/62	78/17696	0.0305871	0.292442	0.261094	CLU/NGFR	2
MF	GO:0019888	protein phosphatase regulator activity	2/62	82/17696	0.0335271	0.292442	0.261094	PPP1R16B/PPP1R1A	2
MF	GO:0071723	lipopeptide binding	1/62	10/17696	0.0344975	0.292442	0.261094	CD1D	1
MF	GO:0033218	amide binding	4/62	356/17696	0.0360823	0.292442	0.261094	CD1D/CMA1/CLU/NGFR	4
MF	GO:0004865	protein serine/threonine phosphatase inhibitor activity	1/62	11/17696	0.0378822	0.292442	0.261094	PPP1R1A	1
MF	GO:0005035	death receptor activity	1/62	11/17696	0.0378822	0.292442	0.261094	NGFR	1
MF	GO:0045236	CXCR chemokine receptor binding	1/62	11/17696	0.0378822	0.292442	0.261094	CXCL12	1
MF	GO:0015174	basic amino acid transmembrane transporter activity	1/62	12/17696	0.0412552	0.292442	0.261094	SLC7A2	1
MF	GO:0032036	myosin heavy chain binding	1/62	12/17696	0.0412552	0.292442	0.261094	CORO1A	1
MF	GO:0033691	sialic acid binding	1/62	12/17696	0.0412552	0.292442	0.261094	ADIPOQ	1
MF	GO:0004896	cytokine receptor activity	2/62	96/17696	0.0446301	0.292442	0.261094	CCR7/IL7R	2
MF	GO:0019208	phosphatase regulator activity	2/62	96/17696	0.0446301	0.292442	0.261094	PPP1R16B/PPP1R1A	2
MF	GO:0005539	glycosaminoglycan binding	3/62	229/17696	0.0463264	0.292442	0.261094	SELL/APOH/EPYC	3
MF	GO:0045028	G protein-coupled purinergic nucleotide receptor activity	1/62	14/17696	0.0479663	0.292442	0.261094	P2RY10	1
MF	GO:0060229	lipase activator activity	1/62	14/17696	0.0479663	0.292442	0.261094	APOH	1

## Sheet: S7
Table S7 Gene set enrichment analysis of ICI score
High ICI score						Low ICI score
NAME	SIZE	Enrichment Score	NES	NOM p-val		NAME	SIZE	Enrichment Score	NES	NOM p-val
KEGG_GLYCINE_SERINE_AND_THREONINE_METABOLISM	31	0.673096	1.85579	0		KEGG_NOD_LIKE_RECEPTOR_SIGNALING_PATHWAY	60	-0.569414	-1.62758	0.0213178
KEGG_PROXIMAL_TUBULE_BICARBONATE_RECLAMATION	22	0.677795	1.76922	0.00617284		KEGG_RIG_I_LIKE_RECEPTOR_SIGNALING_PATHWAY	64	-0.44296	-1.61648	0.0194553
KEGG_MATURITY_ONSET_DIABETES_OF_THE_YOUNG	25	0.818329	1.69935	0.00211864		KEGG_GLYCOSPHINGOLIPID_BIOSYNTHESIS_GANGLIO_SERIES	15	-0.623489	-1.60968	0.0343434
KEGG_GLYCEROLIPID_METABOLISM	43	0.44223	1.40972	0.0823045		KEGG_GLYCOSAMINOGLYCAN_DEGRADATION	21	-0.53576	-1.56015	0.0306748
KEGG_PROTEIN_EXPORT	22	0.428596	1.35615	0.117318		KEGG_COLORECTAL_CANCER	62	-0.448204	-1.53847	0.0409836
KEGG_SELENOAMINO_ACID_METABOLISM	21	0.398707	1.22043	0.247951		KEGG_AXON_GUIDANCE	127	-0.4608	-1.53582	0.015748
KEGG_RIBOSOME	80	0.411913	1.15809	0.306796		KEGG_TOLL_LIKE_RECEPTOR_SIGNALING_PATHWAY	96	-0.488491	-1.52276	0.0686869
KEGG_CYSTEINE_AND_METHIONINE_METABOLISM	34	0.330528	1.10831	0.325253		KEGG_T_CELL_RECEPTOR_SIGNALING_PATHWAY	106	-0.502518	-1.51891	0.0783133
KEGG_ARGININE_AND_PROLINE_METABOLISM	48	0.299524	1.10676	0.308534		KEGG_PRIMARY_IMMUNODEFICIENCY	35	-0.700722	-1.50818	0.0912698
KEGG_STEROID_BIOSYNTHESIS	15	0.439664	1.07836	0.358051		KEGG_NATURAL_KILLER_CELL_MEDIATED_CYTOTOXICITY	119	-0.49304	-1.50687	0.0518672
KEGG_FATTY_ACID_METABOLISM	40	0.330229	1.03877	0.419149		KEGG_B_CELL_RECEPTOR_SIGNALING_PATHWAY	74	-0.512964	-1.49179	0.0810277
KEGG_OLFACTORY_TRANSDUCTION	349	0.317948	1.03021	0.454545		KEGG_FC_GAMMA_R_MEDIATED_PHAGOCYTOSIS	91	-0.447796	-1.4785	0.0698603
KEGG_BUTANOATE_METABOLISM	34	0.323069	1.00427	0.429461		KEGG_NEUROTROPHIN_SIGNALING_PATHWAY	124	-0.366912	-1.47804	0.0532544
KEGG_ALANINE_ASPARTATE_AND_GLUTAMATE_METABOLISM	30	0.297401	0.983764	0.496907		KEGG_P53_SIGNALING_PATHWAY	64	-0.485618	-1.46935	0.074
KEGG_COMPLEMENT_AND_COAGULATION_CASCADES	67	0.353612	0.968349	0.488223		KEGG_BASAL_TRANSCRIPTION_FACTORS	33	-0.431902	-1.46818	0.0848485
KEGG_GLUTATHIONE_METABOLISM	46	0.269785	0.958787	0.4862		KEGG_LEUKOCYTE_TRANSENDOTHELIAL_MIGRATION	113	-0.463391	-1.46649	0.0752896
KEGG_PROPANOATE_METABOLISM	31	0.30518	0.955763	0.514228		KEGG_EPITHELIAL_CELL_SIGNALING_IN_HELICOBACTER_PYLORI_INFECTION	67	-0.384464	-1.45669	0.0452756
KEGG_ALPHA_LINOLENIC_ACID_METABOLISM	17	0.345954	0.889837	0.639583		KEGG_LEISHMANIA_INFECTION	68	-0.538311	-1.44215	0.145349
KEGG_PRIMARY_BILE_ACID_BIOSYNTHESIS	16	0.379993	0.885611	0.604701		KEGG_NUCLEOTIDE_EXCISION_REPAIR	42	-0.429326	-1.44063	0.115464
KEGG_PRION_DISEASES	35	0.273749	0.851178	0.656379		KEGG_APOPTOSIS	86	-0.42333	-1.43565	0.103516
KEGG_NITROGEN_METABOLISM	23	0.327131	0.840486	0.717105		KEGG_CHRONIC_MYELOID_LEUKEMIA	73	-0.396132	-1.40633	0.110169
KEGG_TASTE_TRANSDUCTION	50	0.290376	0.835349	0.704062		KEGG_SMALL_CELL_LUNG_CANCER	84	-0.443149	-1.39901	0.103239
KEGG_REGULATION_OF_AUTOPHAGY	30	0.226961	0.826805	0.655391		KEGG_CYTOKINE_CYTOKINE_RECEPTOR_INTERACTION	244	-0.507715	-1.39556	0.116
KEGG_NEUROACTIVE_LIGAND_RECEPTOR_INTERACTION	267	0.258674	0.796764	0.846791		KEGG_PANCREATIC_CANCER	69	-0.415368	-1.3907	0.142562
KEGG_DRUG_METABOLISM_CYTOCHROME_P450	55	0.295632	0.786367	0.737991		KEGG_ADHERENS_JUNCTION	67	-0.392521	-1.3813	0.123753
KEGG_PENTOSE_AND_GLUCURONATE_INTERCONVERSIONS	16	0.317807	0.768258	0.739669		KEGG_GLYCOSAMINOGLYCAN_BIOSYNTHESIS_CHONDROITIN_SULFATE	22	-0.5371	-1.37458	0.14405
KEGG_BIOSYNTHESIS_OF_UNSATURATED_FATTY_ACIDS	18	0.281446	0.763958	0.741414		KEGG_ECM_RECEPTOR_INTERACTION	84	-0.507576	-1.37071	0.142023
KEGG_VALINE_LEUCINE_AND_ISOLEUCINE_DEGRADATION	43	0.206535	0.716379	0.786885		KEGG_PATHWAYS_IN_CANCER	319	-0.383442	-1.36935	0.106299
KEGG_ALDOSTERONE_REGULATED_SODIUM_REABSORPTION	41	0.230744	0.714792	0.891129		KEGG_PATHOGENIC_ESCHERICHIA_COLI_INFECTION	54	-0.363011	-1.3685	0.123552
KEGG_LONG_TERM_DEPRESSION	66	0.209523	0.689671	0.92562		KEGG_THYROID_CANCER	29	-0.421015	-1.36712	0.124
KEGG_BETA_ALANINE_METABOLISM	22	0.226618	0.670894	0.882231		KEGG_HEMATOPOIETIC_CELL_LINEAGE	85	-0.561733	-1.36289	0.139394
KEGG_METABOLISM_OF_XENOBIOTICS_BY_CYTOCHROME_P450	56	0.242303	0.643358	0.92161		KEGG_CHEMOKINE_SIGNALING_PATHWAY	177	-0.442776	-1.33313	0.164683
KEGG_NOTCH_SIGNALING_PATHWAY	47	0.171689	0.64136	0.903475		KEGG_CYTOSOLIC_DNA_SENSING_PATHWAY	49	-0.410331	-1.33266	0.161736
KEGG_PORPHYRIN_AND_CHLOROPHYLL_METABOLISM	29	0.186396	0.582727	0.94958		KEGG_HOMOLOGOUS_RECOMBINATION	26	-0.535279	-1.30378	0.228106
KEGG_CITRATE_CYCLE_TCA_CYCLE	30	0.163208	0.556676	0.919588		KEGG_MISMATCH_REPAIR	22	-0.488152	-1.30095	0.214433
KEGG_RENIN_ANGIOTENSIN_SYSTEM	17	0.226097	0.543615	0.973306		KEGG_ACUTE_MYELOID_LEUKEMIA	57	-0.395598	-1.29345	0.207364
KEGG_LYSINE_DEGRADATION	39	0.151023	0.519544	0.96945		KEGG_VEGF_SIGNALING_PATHWAY	73	-0.373437	-1.28718	0.137177
KEGG_PEROXISOME	77	0.123768	0.469017	0.984881		KEGG_HEDGEHOG_SIGNALING_PATHWAY	56	-0.44277	-1.28696	0.155268
KEGG_PARKINSONS_DISEASE	97	0.0993752	0.457036	0.973948		KEGG_GLIOMA	65	-0.360078	-1.27426	0.186879
KEGG_PYRUVATE_METABOLISM	39	0.123796	0.44529	1		KEGG_HYPERTROPHIC_CARDIOMYOPATHY_HCM	83	-0.41827	-1.26317	0.154455
KEGG_N_GLYCAN_BIOSYNTHESIS	43	0.105973	0.397869	0.997942		KEGG_WNT_SIGNALING_PATHWAY	149	-0.343791	-1.26204	0.176125
						KEGG_ASTHMA	27	-0.557852	-1.26179	0.215726
						KEGG_DORSO_VENTRAL_AXIS_FORMATION	24	-0.423814	-1.26144	0.145315
						KEGG_JAK_STAT_SIGNALING_PATHWAY	145	-0.401107	-1.25907	0.192385
						KEGG_MAPK_SIGNALING_PATHWAY	261	-0.319563	-1.25154	0.156673
						KEGG_REGULATION_OF_ACTIN_CYTOSKELETON	209	-0.335218	-1.24711	0.204724
						KEGG_BASAL_CELL_CARCINOMA	55	-0.454662	-1.24609	0.216797
						KEGG_FOCAL_ADHESION	197	-0.386138	-1.24254	0.241107
						KEGG_FC_EPSILON_RI_SIGNALING_PATHWAY	77	-0.381424	-1.24164	0.214008
						KEGG_ARRHYTHMOGENIC_RIGHT_VENTRICULAR_CARDIOMYOPATHY_ARVC	74	-0.421297	-1.24163	0.203187
						KEGG_PYRIMIDINE_METABOLISM	93	-0.319332	-1.23607	0.27459
						KEGG_CELL_ADHESION_MOLECULES_CAMS	125	-0.470696	-1.23276	0.255489
						KEGG_MELANOGENESIS	101	-0.367376	-1.23241	0.178161
						KEGG_UBIQUITIN_MEDIATED_PROTEOLYSIS	129	-0.296944	-1.23149	0.272912
						KEGG_VIRAL_MYOCARDITIS	65	-0.424416	-1.23052	0.248996
						KEGG_INTESTINAL_IMMUNE_NETWORK_FOR_IGA_PRODUCTION	44	-0.553558	-1.22594	0.267894
						KEGG_RENAL_CELL_CARCINOMA	65	-0.352553	-1.22409	0.255952
						KEGG_CELL_CYCLE	124	-0.413266	-1.21984	0.311475
						KEGG_SPLICEOSOME	117	-0.312396	-1.21977	0.269777
						KEGG_LYSOSOME	118	-0.2875	-1.21919	0.253385
						KEGG_GLYCOLYSIS_GLUCONEOGENESIS	60	-0.356164	-1.2189	0.203883
						KEGG_PHOSPHATIDYLINOSITOL_SIGNALING_SYSTEM	76	-0.360665	-1.21363	0.227799
						KEGG_SNARE_INTERACTIONS_IN_VESICULAR_TRANSPORT	38	-0.308942	-1.21173	0.256461
						KEGG_ENDOCYTOSIS	173	-0.300481	-1.20868	0.23622
						KEGG_GALACTOSE_METABOLISM	26	-0.381152	-1.20445	0.24466
						KEGG_FRUCTOSE_AND_MANNOSE_METABOLISM	33	-0.379655	-1.1906	0.262136
						KEGG_DNA_REPLICATION	36	-0.476479	-1.18962	0.333333
						KEGG_DILATED_CARDIOMYOPATHY	90	-0.393788	-1.18895	0.215649
						KEGG_PROSTATE_CANCER	89	-0.35047	-1.18752	0.27668
						KEGG_NON_SMALL_CELL_LUNG_CANCER	53	-0.354077	-1.18364	0.270876
						KEGG_PENTOSE_PHOSPHATE_PATHWAY	26	-0.35203	-1.17985	0.25974
						KEGG_RNA_POLYMERASE	28	-0.327809	-1.17357	0.294466
						KEGG_HISTIDINE_METABOLISM	26	-0.408539	-1.17152	0.259398
						KEGG_RNA_DEGRADATION	53	-0.319065	-1.16481	0.329897
						KEGG_AMINO_SUGAR_AND_NUCLEOTIDE_SUGAR_METABOLISM	43	-0.334805	-1.15549	0.318008
						KEGG_PROGESTERONE_MEDIATED_OOCYTE_MATURATION	85	-0.32563	-1.14674	0.289796
						KEGG_ALZHEIMERS_DISEASE	142	-0.23164	-1.13893	0.278978
						KEGG_ALLOGRAFT_REJECTION	33	-0.522615	-1.13813	0.370968
						KEGG_BASE_EXCISION_REPAIR	33	-0.375402	-1.12854	0.377246
						KEGG_MTOR_SIGNALING_PATHWAY	51	-0.324142	-1.1237	0.367063
						KEGG_ONE_CARBON_POOL_BY_FOLATE	16	-0.409719	-1.11668	0.339357
						KEGG_OOCYTE_MEIOSIS	110	-0.297463	-1.11323	0.34898
						KEGG_INSULIN_SIGNALING_PATHWAY	137	-0.271202	-1.11074	0.328094
						KEGG_GLYCOSPHINGOLIPID_BIOSYNTHESIS_LACTO_AND_NEOLACTO_SERIES	25	-0.402383	-1.10394	0.356322
						KEGG_AUTOIMMUNE_THYROID_DISEASE	44	-0.443504	-1.10245	0.396304
						KEGG_GRAFT_VERSUS_HOST_DISEASE	32	-0.501908	-1.07972	0.411647
						KEGG_PHENYLALANINE_METABOLISM	17	-0.400216	-1.06664	0.364683
						KEGG_PROTEASOME	42	-0.326564	-1.05868	0.394251
						KEGG_ANTIGEN_PROCESSING_AND_PRESENTATION	67	-0.332365	-1.03001	0.425703
						KEGG_ARACHIDONIC_ACID_METABOLISM	54	-0.358952	-1.02844	0.411439
						KEGG_INOSITOL_PHOSPHATE_METABOLISM	54	-0.310917	-1.02677	0.434951
						KEGG_ENDOMETRIAL_CANCER	51	-0.296262	-1.02658	0.458167
						KEGG_DRUG_METABOLISM_OTHER_ENZYMES	37	-0.356298	-1.01794	0.429942
						KEGG_GNRH_SIGNALING_PATHWAY	98	-0.272601	-1.00902	0.477228
						KEGG_MELANOMA	70	-0.309422	-1.00882	0.468938
						KEGG_PURINE_METABOLISM	146	-0.25059	-1.00576	0.456647
						KEGG_GLYCEROPHOSPHOLIPID_METABOLISM	67	-0.29309	-1.00524	0.438697
						KEGG_TGF_BETA_SIGNALING_PATHWAY	85	-0.319473	-1.00403	0.463462
						KEGG_NICOTINATE_AND_NICOTINAMIDE_METABOLISM	22	-0.355403	-0.995939	0.473077
						KEGG_AMINOACYL_TRNA_BIOSYNTHESIS	22	-0.332082	-0.992948	0.469548
						KEGG_ABC_TRANSPORTERS	44	-0.347435	-0.989965	0.473077
						KEGG_BLADDER_CANCER	40	-0.319687	-0.986112	0.492986
						KEGG_TIGHT_JUNCTION	127	-0.261076	-0.983042	0.485549
						KEGG_ERBB_SIGNALING_PATHWAY	85	-0.257852	-0.977048	0.520958
						KEGG_TYPE_I_DIABETES_MELLITUS	39	-0.414803	-0.972597	0.49187
						KEGG_STARCH_AND_SUCROSE_METABOLISM	36	-0.332061	-0.944154	0.511583
						KEGG_OTHER_GLYCAN_DEGRADATION	16	-0.289845	-0.917171	0.537037
						KEGG_AMYOTROPHIC_LATERAL_SCLEROSIS_ALS	52	-0.257282	-0.916085	0.57451
						KEGG_CALCIUM_SIGNALING_PATHWAY	176	-0.286009	-0.902678	0.622568
						KEGG_GAP_JUNCTION	86	-0.25653	-0.888917	0.65362
						KEGG_VASCULAR_SMOOTH_MUSCLE_CONTRACTION	109	-0.267209	-0.867405	0.668582
						KEGG_ADIPOCYTOKINE_SIGNALING_PATHWAY	66	-0.24994	-0.86574	0.632735
						KEGG_O_GLYCAN_BIOSYNTHESIS	25	-0.340027	-0.864793	0.648184
						KEGG_ETHER_LIPID_METABOLISM	28	-0.304847	-0.849553	0.675422
						KEGG_LONG_TERM_POTENTIATION	69	-0.238244	-0.848394	0.676413
						KEGG_TYROSINE_METABOLISM	39	-0.277313	-0.816281	0.709302
						KEGG_VASOPRESSIN_REGULATED_WATER_REABSORPTION	44	-0.209456	-0.815357	0.669776
						KEGG_RETINOL_METABOLISM	47	-0.310154	-0.814449	0.705224
						KEGG_SYSTEMIC_LUPUS_ERYTHEMATOSUS	51	-0.329192	-0.798282	0.666004
						KEGG_GLYCOSAMINOGLYCAN_BIOSYNTHESIS_HEPARAN_SULFATE	26	-0.256431	-0.766	0.820296
						KEGG_GLYCOSYLPHOSPHATIDYLINOSITOL_GPI_ANCHOR_BIOSYNTHESIS	24	-0.245932	-0.76116	0.713726
						KEGG_CARDIAC_MUSCLE_CONTRACTION	70	-0.226638	-0.757887	0.827451
						KEGG_HUNTINGTONS_DISEASE	157	-0.153206	-0.757431	0.744186
						KEGG_STEROID_HORMONE_BIOSYNTHESIS	43	-0.286903	-0.74815	0.861314
						KEGG_LINOLEIC_ACID_METABOLISM	27	-0.306405	-0.723305	0.846743
						KEGG_TERPENOID_BACKBONE_BIOSYNTHESIS	15	-0.271329	-0.707171	0.76506
						KEGG_TRYPTOPHAN_METABOLISM	38	-0.222936	-0.671903	0.929825
						KEGG_SPHINGOLIPID_METABOLISM	34	-0.211533	-0.656288	0.875236
						KEGG_OXIDATIVE_PHOSPHORYLATION	99	-0.145317	-0.641595	0.796715
						KEGG_TYPE_II_DIABETES_MELLITUS	46	-0.223307	-0.633064	0.93
						KEGG_VIBRIO_CHOLERAE_INFECTION	53	-0.147578	-0.609093	0.975518
						KEGG_PANTOTHENATE_AND_COA_BIOSYNTHESIS	16	-0.21426	-0.569641	0.978131
						KEGG_PPAR_SIGNALING_PATHWAY	67	-0.175574	-0.559037	0.98694
						KEGG_GLYOXYLATE_AND_DICARBOXYLATE_METABOLISM	16	-0.148137	-0.458598	0.990234
